# Supplementary material
Source: PubMed Central journal article supplement (PMC2754401)
Supplement: NIHMS125552-supplement-pdf.pdf [file NIHMS125552-supplement-pdf.pdf]

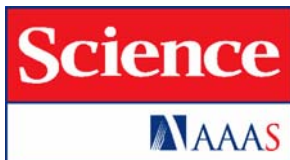

## Supporting Online Material for

### **Virus Attenuation by Genome-Scale Changes in Codon Pair Bias**

J. Robert Coleman, Dimitris Papamichail, Steven Skiena, Bruce Futcher, Eckard Wimmer,\*  
Steffen Mueller

\*To whom correspondence should be addressed. E-mail: [ewimmer@ms.cc.sunysb.edu](mailto:ewimmer@ms.cc.sunysb.edu)

Published 27 June 2008, *Science* **320**, 1784 (2008)  
DOI: 10.1126/science.1155761

#### **This PDF file includes:**

Materials and Methods

Figs. S1 to S4

Tables S1 and S2

References

## **Supplementary Materials**

### **Materials and Methods**

**Definition and Calculation of codon pair bias.** We developed an algorithm to quantify codon pair bias. For each of the 3721 possible codon pairs (excluding Stop codon pairs) we calculated a “Codon Pair Score”, or “CPS”. We define the CPS as the natural log of the ratio of the observed over the expected number of occurrences of each codon pair over all human coding regions (Fig. S1, Table S1). Although the calculation of the observed occurrences of a particular codon pair is straightforward (the actual count within the gene set), the expected number of occurrences of a codon pair requires additional calculation. We calculate this expected number so as to be independent both of amino acid frequency and of codon bias similarly to Gutman and Hatfield (51). That is, the expected frequency is calculated based on the relative proportion of the number of times an amino acid is encoded by a specific codon (Fig. S1). A positive CPS value signifies that the given codon pair is statistically over-represented, and a negative CPS indicates the pair is statistically under-represented in the human genome. The calculated CPS scores for all 3721 possible codon pairs can be found in Table S1.

Using these calculated CPSs, the *Codon Pair Bias* (CPB) for an entire open reading frame can then be calculated as the arithmetic mean of the individual codon pair scores. The CPB has been calculated for a core set of 14795 consistently annotated human genes (CCDS data set issued by NCB, release date March 2nd 2005) using the equations shown in Fig. S1 and plotted (Fig. 1B, main text). Each point in the graph

corresponds to the CPB of a single human gene. A negative CPB signifies a prevalent use of underrepresented codon pairs, while a positive CPB indicates predominant use of overrepresented codon pairs. The peak of the distribution has a positive codon pair bias of 0.07, which is the mean score for all annotated human genes.

**Development and Implementation of computer-based algorithm to produce codon pair deoptimized sequences.** Using these formulas we next developed a computer based algorithm to manipulate the CPB of any coding region while maintaining the original amino acid sequence. The algorithm has the critical ability to maintain the codon usage of a gene (i.e. preserve the frequency of use of each existing codon) but “shuffle” the existing codons so that the CPB can be increased or decreased. The algorithm uses simulated annealing, a mathematical process suitable for full-length optimization (S2). Other parameters are also under the control of this algorithm; for instance, the free energy of the folding of the RNA. This free energy is maintained within a narrow range, to prevent large changes in secondary structure as a consequence of codon re-arrangement. The optimization process specifically excludes the creation of any regions with large secondary structures, such as hairpins or stem loops, which could otherwise arise in the customized RNA. Using this computer software the user simply needs to input the cDNA sequence of a given gene and the CPB of the gene can be customized as the experimenter sees fit. In the experiments here, the starting CPB of wild-type poliovirus (i.e., PV(M)-wt) is -0.02, while PV-Min has a CPB of -0.48, and PV-Max has a CPB of 0.25.

Additional customization included inclusion of restriction sites that were designed into both synthetic sequences at given intervals, to allow for sub-cloning of the P1 region.

**DNA Synthesis, Plasmids, Sub cloning of Synthetic Capsids and Bacteria.** Poliovirus cDNA fragments with altered codon pair bias, corresponding to nucleotides 495 to 3636 of the viral genome, were synthesized *de novo* (Blue Heron Corp, Bothell, WA). All subsequent poliovirus cDNA clones/sub clones were constructed based on plasmid pT7PVM, which contains a full length infectious cDNA clone of poliovirus type 1 Mahoney [PV(M)] downstream of a T7 RNA polymerase promoter (S3). Specifically, the synthetic PV-Min, PV-Max cassettes were released from Blue Heron's carrier vector via *PflM* I digestion and used to replace the respective *PflM* I fragment in the pT7PVM vector. The PV-MinXY and PV-MinZ constructs were obtained by digestion with *Nhe* I and *Bgl* II simultaneously, then swapping this fragment with a pT7PVM vector digested similarly. PV-MinX and PV-MinYZ were constructed via *Bsm* I digestion and exchanging the fragment/vector with the similarly digested pT7PVM. PV-MinY was constructed by digesting the PV-MinXY construct with *Bsm* I and swapping this fragment with the *Bsm* I fragment for a digested pT7PVM. Plasmid transformation and amplification were all performed in *Escherichia coli* DH5 $\alpha$ .

**In vitro Transcription and RNA transfection.** 1.5  $\mu$ g of plasmid DNA was linearized with *EcoR* I and then transcribed by T7 RNA polymerase driven by a T7 promoter upstream of the cDNA for 2 hours at 37°C (S3). 1  $\mu$ g of transcript RNA was transfected into  $1 \times 10^6$  HeLa R19 cells using a modified DEAE-Dextran method (S3). These cells

were then incubated at room-temperature (RT) for 30 minutes after which the transfection supernatant was replaced with Dulbecco's modified Eagle medium (DMEM) containing 2% bovine calf serum (BCS). The cells were then incubated at 37° C and observed (up to 4 days) for the onset of cytopathic effect (CPE).

**Cells, virus, virus amplification, plaque assay, and one-step growth curves.** HeLa R19 cells were maintained as a monolayer in DMEM containing 10% BCS. Viruses were amplified on  $1.0 \times 10^8$  HeLa R19 cell monolayers infected at a multiplicity of infection (MOI) of 1. Infected cells were incubated at 37°C in DMEM with 2% BCS for three days or until CPE was observed. After three freeze/thaw cycles cell debris was removed from the lysates via low speed centrifugation and the supernatant containing virus was used for further experiments.

One-Step growth curves were obtained by infecting a monolayer of HeLa R19 cells with 2 MOI of a given virus. Excess inoculum was removed after 30 min after which the cells were washed 2x with PBS and incubated at 37°C for 0, 2, 4, 7, 10, 24, and 48 hours. Virus produced at these time points was quantified after 72 hours by plaque assays on HeLa cell monolayers.

**Heat stability and passaging.** The thermal stability of the synthetic viruses, PV-MinXY and PV-Min Z, was tested and compared to the wt virus PV(M). This was done by heating  $1 \times 10^8$  particles suspended in PBS at 50°C for 5, 15, 30 and, 60 minutes followed by plaque assays to measure the decrease of infectious virus at the different time points (Fig. S2). In order to test the genetic stability of the synthetic portions of the P1 region of

PV-MinXY and PV-MinZ, viruses were serially passaged and their genomes were sequenced. Briefly, monolayers of  $1 \times 10^6$  HeLa R19 cells were infected with 0.5 MOI of PV-MinXY and PV-MinZ and incubated until CPE was clearly visible. Throughout passages, the time interval until CPE developed, remained constant. Finally, the titers and nucleotide sequences of viruses that emerged after passage 5, 9, 15, 17 and 19 were determined (data not shown).

**Virus Purification and determination of viral particles via  $OD_{260}$  absorbance.** A monolayer of HeLa R19 cells on a 15 cm dish ( $1 \times 10^8$  cells) was infected with wt virus PV1(M), PV-Max, PV-MinXY or PV-Min Z at an MOI of 1 and incubated until CPE was observed. After three freeze/thaw cycles the cell lysates were subjected to two centrifugations at  $3,000 \times g$  for 15 minutes and then to one centrifugation at  $10,000 \times g$  for 15 minutes.  $10 \mu\text{g/ml}$  of RNase A was added to the supernatants of the second centrifugation to destroy free RNA. After an incubation at room temperature for 1 hour the supernatants were gently mixed with sodium dodecyl sulfate (SDS) and EDTA at final concentrations of 0.5 % and 2 mM, respectively, followed by incubation at room temperature for 30 minutes (S4). Only properly formed, intact virus particles survive this treatment (S5). These supernatants were placed above a 6ml sucrose cushion [30% sucrose in Hank's Buffered Salt Solution (HBSS)] and virus particles were sedimented by ultracentrifugation for 3.5 hours at 28,000 rpm using an SW28 swing-bucket rotor (S4).

After centrifugation, the supernatant above the sucrose cushion was removed and the tube was rinsed two times with HBBS without disturbing the sucrose cushion. The sucrose was then gently removed and the virus pellet at the bottom was re-suspended in

PBS containing 0.1% SDS (4). Viral titers were determined via plaque assay see (above). Virus particle concentration was determined via the average of three measurements of the optical density at 260nm of the solution via the NanoDrop spectrophotometer (NanoDrop Technologies) using the formula  $9.4 \times 10^{12}$  particles/ml = 1 OD<sub>260</sub> unit (S4, 6)

**Dicistronic reporter construction, and in vivo translation.** The dicistronic reporter replicons were all constructed based upon pdiLuc-PV (S4). PV-Max and PV-Min capsid regions were amplified via PCR using the oligonucleotides P1max-2A-RI (+)/P1max-2A-RI (-) or P1min-2A-RI (+)/P1min-2A-RI (-) respectively. The PCR fragment was gel purified and then inserted into an intermediate vector pCR-®-XL-TOPO® (Invitrogen Corp.). This intermediate vector was then amplified in One Shot® TOP10 chemically competent cells (Invitrogen Corp.). After preparation of the plasmid using Qiagen miniprep columns (Qiagen, Hilden Germany), the intermediate vectors containing PV-Min were digested with EcoRI and these fragments were ligated into the pdiLuc-PV vector that was equally digested with *EcoR* I (S4). These plasmids were also amplified in One Shot® TOP10 chemically competent cells. To construct pdiLuc-PV-MinXY and pdiLuc-PV-MinZ, pdiLuc-PV and pdiLuc-PV-Min each were digested with NheI and the resulting restriction fragments were exchanged between the respective vectors. These were then transformed into One Shot® TOP10 chemically competent cells and amplified. From all four of these clones RNA was in vitro transcribed as described above.

To analyze the in vivo translation efficiency of the synthetic region encoding the poliovirus capsids the RNAs of the dicistronic reporter constructs each were transfected into  $2 \times 10^5$  HeLa R19 cells on 12-well dishes using Lipofectamine 2000 (Invitrogen

Corp.). In order to quantify the translation of only the input RNA transfections were carried out in the presence of 2 mM guanidine hydrochloride (GnHCL), a potent and specific inhibitor of poliovirus RNA replication. Six hours after transfection cells were lysed in passive lysis buffer (Promega, Madison, WI) and these lysates were analyzed by a dual firefly (F-Luc) *Renilla* (R-Luc) luciferase assay (Promega).

**Oligonucleotides.** The following oligonucleotides were utilized to perform PCR:

P1max-2A-RI(+), 5'

CAAGAATTCCTGACCACATACGGAGCTCAAGTATCTTCACAAAAAGTTGG-3';

P1max-2A-RI(-), 5'

TTCGAATTCTCCGTACGTGGTGAGGTCTTTGGTGGACAAAGG-3'; P1min-2A-

RI(+),

5'CAAGAATTCCTGACCACATACGGAGCTCAGGTGTCATCCCAAAAAGTAGG-

3'; P1min-2A-RI(-), 5'

TTCGAATTCTCCGTACGTTCGTAAGGTCTTTCGTTGACAGTGG-3'.

**CD155tg mice: neuropathogenicity, vaccination, serum conversion.** Groups of 4-6, 6-8 week old *CD155* tg mice (Tg21 strain) were injected intracerebrally with purified virus ranging from  $10^2$  particles to  $10^9$  particles in 30 ul PBS to determine neuropathogenicity (S7). The lethal dose 50 ( $LD_{50}$ ) was calculated according to the method by the Reed and Muench (S8). Viral titers in the spinal cord and brain were quantified by plaque assay (data not shown).



To test PV-Min Z and PV-MinXY as a vaccine, three doses ( $10^8$  particles in 100ul of PBS) of these viruses were administered to 6-8 week old CD155tg mice via intraperitoneal injection once a week for three weeks. In parallel, a set of control mice received three mock vaccinations with 100 ul PBS. One week after the final vaccination, 30 ul of blood was extracted from the tail vein and subjected to low speed centrifugation after which the serum harvested (S9). Neutralizing antibodies against wt PV(M) in these sera were analyzed via micro-neutralization assay with 100 plaque forming units (PFU) of challenge virus, performed according to the recommendations of WHO (S9, 10). Two weeks after the final inoculations, the vaccinated and control mice were challenged with  $10^6$  PFU (a lethal dose) of wt PV(M) by intramuscular injection (9). All experiments utilizing CD155tg mice were undertaken in compliance with Stony Brook University's IACUC regulations as well as federal guidelines.

**Determination of RNA folding energies, exclusion of large (100bp) stable secondary structures.** To ensure that strong secondary structures do not affect translation efficiency, we scanned the capsid region of our designs using the program mfold (S11). We concentrated our search on 100-base long segments, having 80 bases overlap with each other. Any segments with lower binding energy than a threshold of - 30Kcal/mol would incur random synonymous substitutions at C - G binding locations, such that the binding energy of the segment could be elevated. The synonymous changes would be selected in such a way that the codon pair bias objective would be satisfied as well.

**Supporting Information.** The GenBank (<http://www.ncbi.nlm.nih.gov/Genbank/>) accession numbers for the codon-pair bias sequences presented in this paper are: P1-Min (EU095953) and P1-Max (EU095952).

## Supplementary Figures

A

$$\text{CPS} = \ln \left( \frac{F(\text{AB})_o}{\frac{F(\text{A}) \times F(\text{B})}{F(\text{X}) \times F(\text{Y})} \times F(\text{XY})} \right)$$

B

$$\text{CPB} = \sum_{i=1}^k \frac{\text{CPS}_i}{k-1}$$

**Figure S1. Equations used to determine codon-pair scores (CPS) and the codon-pair bias (CPB) of an entire open reading frame (ORF).** (A) The equation used to calculate the CPS of a given codon pair independent of codon usage and amino acid bias, thus its relative expected frequency, where the codon pair AB encodes for amino acid pair XY and F denotes frequency (number of occurrences). This CPS score for a given pair determines if the pair is over-represented (+) or under-represented (-) in the human genome. (B) The equation used to calculate the CPB for an entire gene. CPB is the arithmetic mean of the individual codon pair scores of all pairs making up the ORF.

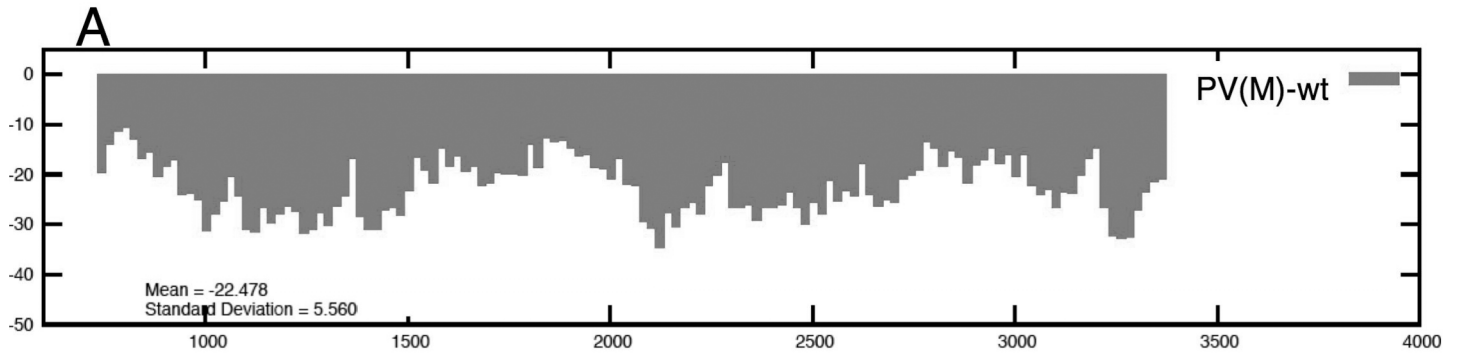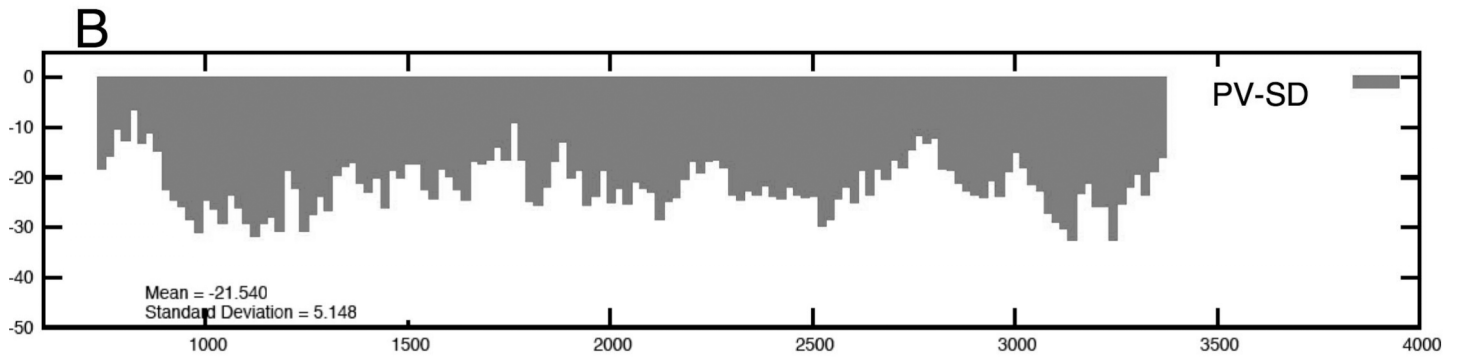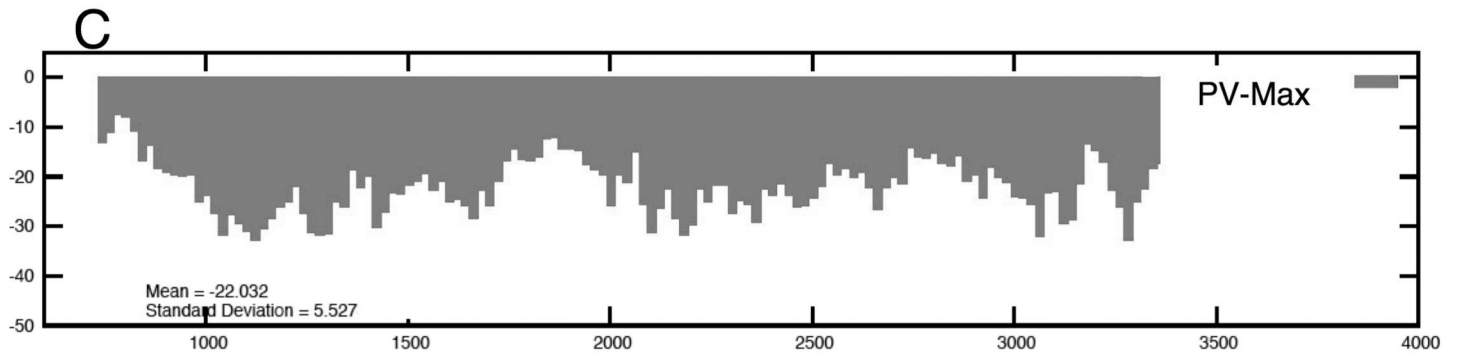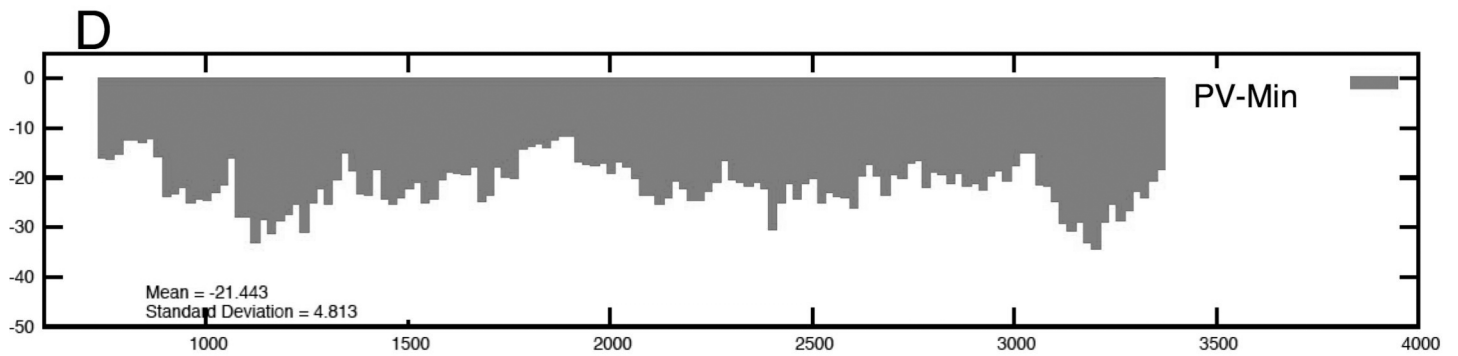

**Figure S2. Synthetic P1s have similar folding energy to wild-type, ensuring absences of large, stable secondary RNA structure.** To ensure that strong secondary structures do not affect translation efficiency, we scanned the capsid region of our designs using the program mFold (S11). We concentrated our search on 100-base long segments, having 80 bases overlap with each other. Any segments with lower binding energy than a threshold of -30Kcal/mol would incur random synonymous substitutions at C - G binding locations, such that the binding energy of the segment could be elevated. The synonymous changes would be selected in such a way that the codon pair bias objective would be satisfied as well. Nevertheless, only a few changes resulted thus altering the original codon pair selections of our algorithm. All constructs thus have a similar mean folding energy (A) PV(M)-wt, mean -22.478, (B) PV-SD, mean -21.540, (C) PV-Max, mean -22.032, (D) PV-Min, mean -21.443.

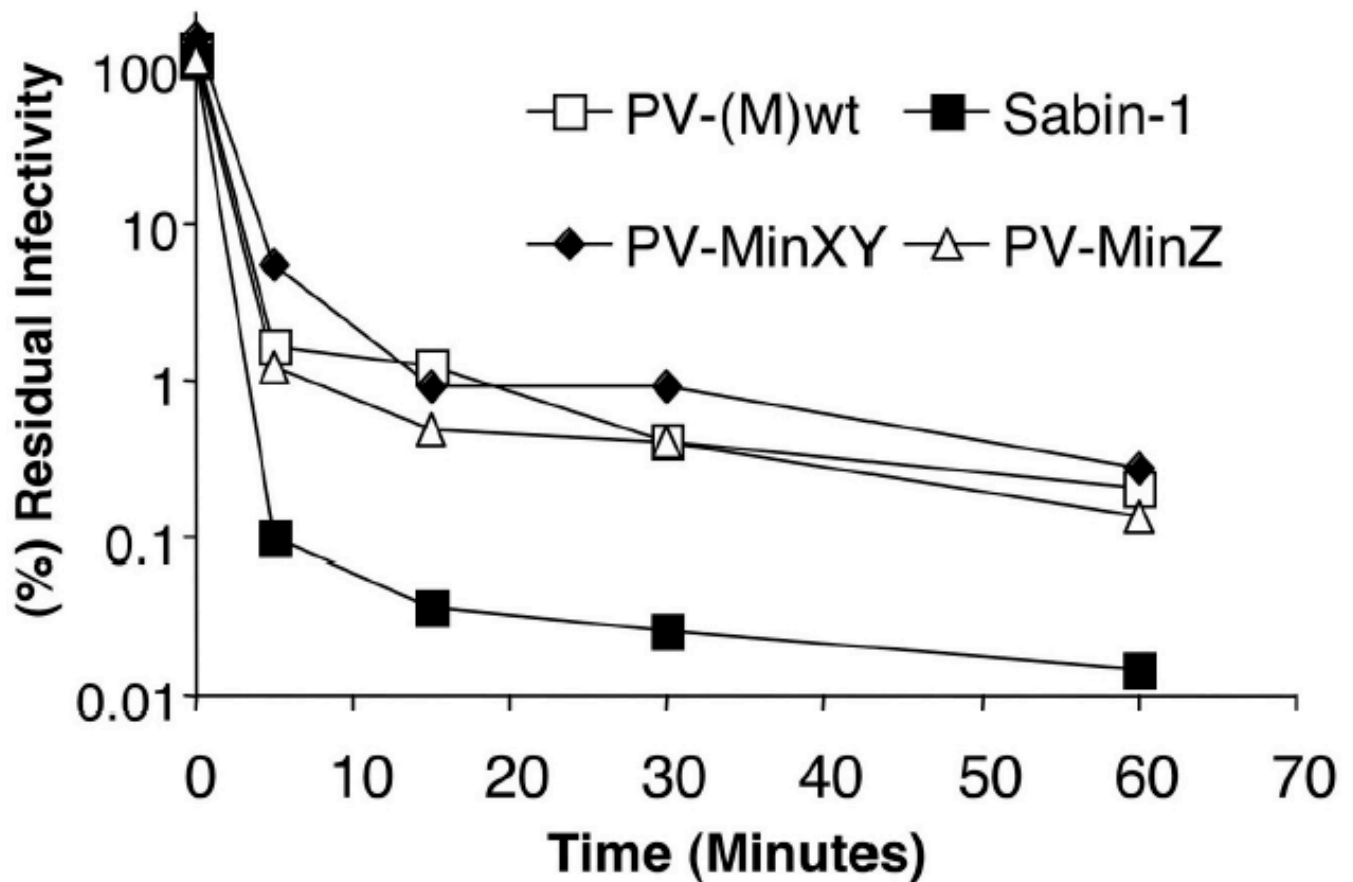

**Figure S3.** The heat inactivation profile of the synthetic viruses is unchanged. To rule out that large scale codon-pair bias modification alters the gross morphology of virions, as one might expect if capsid proteins were misfolded, the thermal stability of PV-MinXY and PV-MinZ was tested. An equal number of particles were incubated at 50°C and the remaining infectivity quantified after given periods of time via plaque assay. If the capsids of the synthetic viruses were destabilized we would expect increased loss of viability at 50°C in comparison to PV(M)-wt. This was not the case. The thermal inactivation kinetics of both synthetic viruses was identical to the wt. In contrast, the Sabin-1 virus carries numerous mutations in the genome region encoding the capsid, which, fittingly, rendered this virus less heat stable as compared to wt PV1(M).

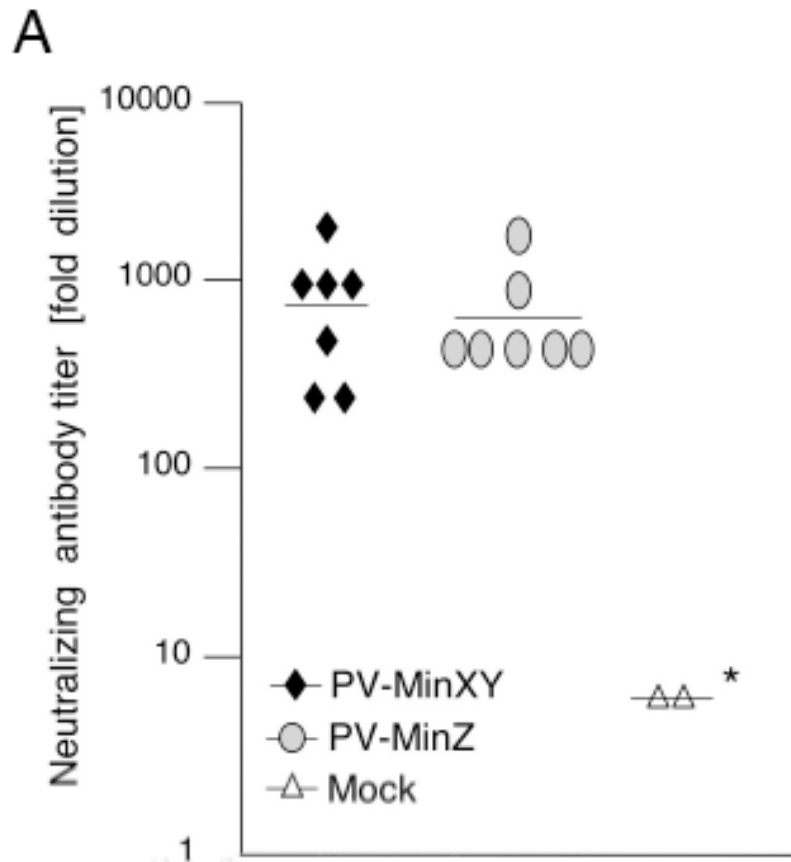

**B**

| Virus           | Mice Protected (out of 7) |
|-----------------|---------------------------|
| PV-MinZ         | 7                         |
| PV-MinXY        | 7                         |
| Mock vaccinated | 0                         |

**Figure S4.** Induction of neutralizing antibodies by PV-MinZ and PV-MinXY and protection after challenge. Since PV-MinZ and PV-MinXY encode exactly the same proteins as wild-type virus, they might provoke a protective immune response. Alternatively, the relatively poor translation of the mutant mRNAs might prevent such a response. To distinguish these possibilities, PV-MinZ and PV-MinXY were administered to groups of eight *CD155tg* mice at a dose of  $10^8$  particles once a week for three weeks via intraperitoneal injection. (A) Ten days after the final injection the protective antibodies of the seven surviving mice in each group were measured via micro-neutralization assay, and a robust immune response was detected, as indicated (878 for PV-MinXY, 805 for PV-MinZ) (S9, 10). (B) Subsequent challenge of the vaccinated mice with an otherwise lethal dose of wild-type poliovirus via intramuscular injection did not lead to death or signs of paralysis or paresia; in contrast, all mock vaccinated mice succumbed to challenge. (\*) No virus neutralization for mock-vaccinated animals was detected at the lowest tested dilution of 1:8.

## Supplementary Tables

**Table S1.** Calculated codon pair scores (CPS) for all 3721 possible codon pair combinations (excluding Stop codons) in the human ORFeome. Column A, amino acid pair; Column B, codon pair; Column C, expected number of occurrences of the codon pair within the human ORFeome; Column D, observed number of occurrences of this codon pair within the ORFeome; Column E, ratio of observed occurrences over expected occurrences; Column F, the natural log of the ratio in column E corresponds to the codon pair score (CPS) for the codon pair in column B.



| <b>AA pair</b> | <b>Codon pair</b> | <b>Expected</b> | <b>Observed</b> | <b>Observed/Expected</b> | <b>CPS</b>    |
|----------------|-------------------|-----------------|-----------------|--------------------------|---------------|
| AA             | GCGGCG            | 630.04          | 2870            | 4.555                    | <b>1.516</b>  |
| AA             | GCGGCC            | 2330.20         | 4032            | 1.730                    | <b>0.548</b>  |
| AA             | GCTGCT            | 3727.41         | 5562            | 1.492                    | <b>0.400</b>  |
| AA             | GCAGCA            | 2856.40         | 4196            | 1.469                    | <b>0.385</b>  |
| AA             | GCAGCT            | 3262.97         | 4711            | 1.444                    | <b>0.367</b>  |
| AA             | GCTGCA            | 3262.97         | 4357            | 1.335                    | <b>0.289</b>  |
| AA             | GCTGCC            | 5667.77         | 7014            | 1.238                    | <b>0.213</b>  |
| AA             | GCAGCC            | 4961.56         | 6033            | 1.216                    | <b>0.196</b>  |
| AA             | GCAGCG            | 1341.51         | 1420            | 1.059                    | <b>0.057</b>  |
| AA             | GCTGCG            | 1532.46         | 1533            | 1.000                    | <b>0.000</b>  |
| AA             | GCGGCT            | 1532.46         | 1472            | 0.961                    | <b>-0.040</b> |
| AA             | GCCGCG            | 2330.20         | 2042            | 0.876                    | <b>-0.132</b> |
| AA             | GCGGCA            | 1341.51         | 1142            | 0.851                    | <b>-0.161</b> |
| AA             | GCCGCC            | 8618.21         | 5141            | 0.597                    | <b>-0.517</b> |
| AA             | GCCGCT            | 5667.77         | 1378            | 0.243                    | <b>-1.414</b> |
| AA             | GCCGCA            | 4961.56         | 1122            | 0.226                    | <b>-1.487</b> |
| AC             | GCCTGC            | 2333.61         | 3975            | 1.703                    | <b>0.533</b>  |
| AC             | GCCTGT            | 1965.56         | 2436            | 1.239                    | <b>0.215</b>  |
| AC             | GCGTGC            | 630.96          | 560             | 0.888                    | <b>-0.119</b> |
| AC             | GCTTGT            | 1292.65         | 1142            | 0.883                    | <b>-0.124</b> |
| AC             | GCATGT            | 1131.59         | 881             | 0.779                    | <b>-0.250</b> |
| AC             | GCGTGT            | 531.45          | 322             | 0.606                    | <b>-0.501</b> |
| AC             | GCTTGC            | 1534.70         | 894             | 0.583                    | <b>-0.540</b> |
| AC             | GCATGC            | 1343.47         | 554             | 0.412                    | <b>-0.886</b> |
| AD             | GCAGAT            | 2373.33         | 4215            | 1.776                    | <b>0.574</b>  |
| AD             | GCTGAT            | 2711.15         | 3887            | 1.434                    | <b>0.360</b>  |
| AD             | GCTGAC            | 3062.55         | 4374            | 1.428                    | <b>0.356</b>  |
| AD             | GCGGAC            | 1259.11         | 1625            | 1.291                    | <b>0.255</b>  |
| AD             | GCAGAC            | 2680.95         | 3395            | 1.266                    | <b>0.236</b>  |
| AD             | GCGGAT            | 1114.64         | 839             | 0.753                    | <b>-0.284</b> |
| AD             | GCCGAC            | 4656.80         | 2726            | 0.585                    | <b>-0.535</b> |
| AD             | GCCGAT            | 4122.47         | 920             | 0.223                    | <b>-1.500</b> |
| AE             | GCAGAA            | 3517.48         | 5814            | 1.653                    | <b>0.503</b>  |
| AE             | GCAGAG            | 4703.98         | 7094            | 1.508                    | <b>0.411</b>  |
| AE             | GCGGAG            | 2209.23         | 3171            | 1.435                    | <b>0.361</b>  |
| AE             | GCTGAG            | 5373.53         | 7362            | 1.370                    | <b>0.315</b>  |
| AE             | GCTGAA            | 4018.14         | 5186            | 1.291                    | <b>0.255</b>  |
| AE             | GCCGAG            | 8170.80         | 5082            | 0.622                    | <b>-0.475</b> |
| AE             | GCGGAA            | 1651.99         | 949             | 0.574                    | <b>-0.554</b> |
| AE             | GCCGAA            | 6109.85         | 1097            | 0.180                    | <b>-1.717</b> |
| AF             | GCCTTC            | 4447.90         | 7382            | 1.660                    | <b>0.507</b>  |
| AF             | GCATTT            | 2237.22         | 2332            | 1.042                    | <b>0.041</b>  |
| AF             | GCTTTT            | 2555.66         | 2580            | 1.010                    | <b>0.009</b>  |
| AF             | GCCTTT            | 3886.04         | 3842            | 0.989                    | <b>-0.011</b> |
| AF             | GCTTTC            | 2925.16         | 2315            | 0.791                    | <b>-0.234</b> |
| AF             | GCGTTC            | 1202.63         | 636             | 0.529                    | <b>-0.637</b> |
| AF             | GCGTTT            | 1050.71         | 518             | 0.493                    | <b>-0.707</b> |
| AF             | GCATTC            | 2560.68         | 1261            | 0.492                    | <b>-0.708</b> |
| AG             | GCGGGC            | 1369.64         | 2638            | 1.926                    | <b>0.655</b>  |
| AG             | GCGGGG            | 986.17          | 1738            | 1.762                    | <b>0.567</b>  |
| AG             | GCTGGG            | 2398.67         | 3855            | 1.607                    | <b>0.474</b>  |
| AG             | GCTGGT            | 1590.73         | 2524            | 1.587                    | <b>0.462</b>  |

|    |        |         |       |       |               |
|----|--------|---------|-------|-------|---------------|
| AG | GCTGGA | 2457.02 | 3783  | 1.540 | <b>0.432</b>  |
| AG | GCAGGA | 2150.87 | 3074  | 1.429 | <b>0.357</b>  |
| AG | GCAGGG | 2099.79 | 2782  | 1.325 | <b>0.281</b>  |
| AG | GCAGGT | 1392.52 | 1748  | 1.255 | <b>0.227</b>  |
| AG | GCTGGC | 3331.38 | 3961  | 1.189 | <b>0.173</b>  |
| AG | GCAGGC | 2916.28 | 3119  | 1.070 | <b>0.067</b>  |
| AG | GCGGGT | 654.00  | 617   | 0.943 | <b>-0.058</b> |
| AG | GCGGGA | 1010.16 | 793   | 0.785 | <b>-0.242</b> |
| AG | GCCGGG | 3647.33 | 2240  | 0.614 | <b>-0.488</b> |
| AG | GCCGGC | 5065.58 | 2977  | 0.588 | <b>-0.532</b> |
| AG | GCCGGT | 2418.80 | 581   | 0.240 | <b>-1.426</b> |
| AG | GCCGGA | 3736.06 | 795   | 0.213 | <b>-1.547</b> |
| AH | GCGCAC | 748.29  | 983   | 1.314 | <b>0.273</b>  |
| AH | GCCCAC | 2767.53 | 3465  | 1.252 | <b>0.225</b>  |
| AH | GCTCAT | 1319.86 | 1471  | 1.115 | <b>0.108</b>  |
| AH | GCACAT | 1155.40 | 1122  | 0.971 | <b>-0.029</b> |
| AH | GCCCAT | 2006.93 | 1827  | 0.910 | <b>-0.094</b> |
| AH | GCTCAC | 1820.07 | 1526  | 0.838 | <b>-0.176</b> |
| AH | GCACAC | 1593.29 | 1312  | 0.823 | <b>-0.194</b> |
| AH | GCGCAT | 542.64  | 248   | 0.457 | <b>-0.783</b> |
| AI | GCCATC | 3894.51 | 7798  | 2.002 | <b>0.694</b>  |
| AI | GCCATT | 3079.73 | 3761  | 1.221 | <b>0.200</b>  |
| AI | GCAATA | 815.43  | 924   | 1.133 | <b>0.125</b>  |
| AI | GCAATT | 1773.02 | 1684  | 0.950 | <b>-0.052</b> |
| AI | GCCATA | 1416.41 | 1257  | 0.887 | <b>-0.119</b> |
| AI | GCTATT | 2025.39 | 1709  | 0.844 | <b>-0.170</b> |
| AI | GCTATA | 931.50  | 771   | 0.828 | <b>-0.189</b> |
| AI | GCTATC | 2561.23 | 1194  | 0.466 | <b>-0.763</b> |
| AI | GCGATT | 832.70  | 373   | 0.448 | <b>-0.803</b> |
| AI | GCAATC | 2242.09 | 984   | 0.439 | <b>-0.824</b> |
| AI | GCGATA | 382.97  | 149   | 0.389 | <b>-0.944</b> |
| AI | GCGATC | 1053.00 | 404   | 0.384 | <b>-0.958</b> |
| AK | GCCAAG | 5767.01 | 9818  | 1.702 | <b>0.532</b>  |
| AK | GCAAAA | 2563.57 | 3011  | 1.175 | <b>0.161</b>  |
| AK | GCCAAA | 4452.91 | 4794  | 1.077 | <b>0.074</b>  |
| AK | GCAAAG | 3320.10 | 3044  | 0.917 | <b>-0.087</b> |
| AK | GCTAAA | 2928.46 | 2022  | 0.690 | <b>-0.370</b> |
| AK | GCGAAG | 1559.29 | 765   | 0.491 | <b>-0.712</b> |
| AK | GCTAAG | 3792.68 | 1725  | 0.455 | <b>-0.788</b> |
| AK | GCGAAA | 1203.98 | 409   | 0.340 | <b>-1.080</b> |
| AL | GCGCTG | 2369.16 | 4619  | 1.950 | <b>0.668</b>  |
| AL | GCGCTC | 1140.05 | 1765  | 1.548 | <b>0.437</b>  |
| AL | GCTTTG | 1873.51 | 2601  | 1.388 | <b>0.328</b>  |
| AL | GCCCTG | 8762.30 | 11409 | 1.302 | <b>0.264</b>  |
| AL | GCCTTG | 2848.79 | 3695  | 1.297 | <b>0.260</b>  |
| AL | GCTTTA | 1115.24 | 1385  | 1.242 | <b>0.217</b>  |
| AL | GCCCTC | 4216.45 | 4499  | 1.067 | <b>0.065</b>  |
| AL | GCTCTT | 1912.07 | 2038  | 1.066 | <b>0.064</b>  |
| AL | GCATTA | 976.28  | 986   | 1.010 | <b>0.010</b>  |
| AL | GCTCTA | 1031.16 | 940   | 0.912 | <b>-0.093</b> |
| AL | GCACTT | 1673.82 | 1444  | 0.863 | <b>-0.148</b> |
| AL | GCATTG | 1640.07 | 1364  | 0.832 | <b>-0.184</b> |
| AL | GCACTA | 902.68  | 747   | 0.828 | <b>-0.189</b> |

|    |        |         |      |       |               |
|----|--------|---------|------|-------|---------------|
| AL | GCGCTA | 423.94  | 342  | 0.807 | <b>-0.215</b> |
| AL | GCCCTA | 1567.95 | 1228 | 0.783 | <b>-0.244</b> |
| AL | GCTCTG | 5762.53 | 4505 | 0.782 | <b>-0.246</b> |
| AL | GCCCTT | 2907.42 | 2230 | 0.767 | <b>-0.265</b> |
| AL | GCTCTC | 2772.95 | 2036 | 0.734 | <b>-0.309</b> |
| AL | GCCTTA | 1695.80 | 1205 | 0.711 | <b>-0.342</b> |
| AL | GCACTG | 5044.51 | 3522 | 0.698 | <b>-0.359</b> |
| AL | GCGTTG | 770.26  | 476  | 0.618 | <b>-0.481</b> |
| AL | GCGCTT | 786.11  | 459  | 0.584 | <b>-0.538</b> |
| AL | GCACTC | 2427.43 | 1415 | 0.583 | <b>-0.540</b> |
| AL | GCGTTA | 458.51  | 169  | 0.369 | <b>-0.998</b> |
| AM | GCCATG | 4236.47 | 6521 | 1.539 | <b>0.431</b>  |
| AM | GCAATG | 2438.96 | 1900 | 0.779 | <b>-0.250</b> |
| AM | GCTATG | 2786.11 | 1561 | 0.560 | <b>-0.579</b> |
| AM | GCGATG | 1145.46 | 625  | 0.546 | <b>-0.606</b> |
| AN | GCCAAC | 3190.28 | 5452 | 1.709 | <b>0.536</b>  |
| AN | GCAAAT | 1667.60 | 2282 | 1.368 | <b>0.314</b>  |
| AN | GCCAAT | 2896.62 | 3122 | 1.078 | <b>0.075</b>  |
| AN | GCAAAC | 1836.66 | 1512 | 0.823 | <b>-0.195</b> |
| AN | GCTAAT | 1904.97 | 1356 | 0.712 | <b>-0.340</b> |
| AN | GCTAAC | 2098.09 | 925  | 0.441 | <b>-0.819</b> |
| AN | GCGAAC | 862.59  | 331  | 0.384 | <b>-0.958</b> |
| AN | GCGAAT | 783.19  | 260  | 0.332 | <b>-1.103</b> |
| AP | GCGCCG | 406.74  | 1172 | 2.881 | <b>1.058</b>  |
| AP | GCGCCC | 1122.56 | 2271 | 2.023 | <b>0.705</b>  |
| AP | GCCCCG | 1504.34 | 2335 | 1.552 | <b>0.440</b>  |
| AP | GCTCCA | 2360.19 | 2463 | 1.044 | <b>0.043</b>  |
| AP | GCTCCT | 2445.47 | 2548 | 1.042 | <b>0.041</b>  |
| AP | GCCCCC | 4151.78 | 3957 | 0.953 | <b>-0.048</b> |
| AP | GCACCT | 2140.76 | 2028 | 0.947 | <b>-0.054</b> |
| AP | GCCCCA | 3588.82 | 3371 | 0.939 | <b>-0.063</b> |
| AP | GCACCA | 2066.10 | 1831 | 0.886 | <b>-0.121</b> |
| AP | GCACCC | 2390.20 | 2111 | 0.883 | <b>-0.124</b> |
| AP | GCCCCT | 3718.49 | 3269 | 0.879 | <b>-0.129</b> |
| AP | GCTCCC | 2730.42 | 2384 | 0.873 | <b>-0.136</b> |
| AP | GCTCCG | 989.33  | 773  | 0.781 | <b>-0.247</b> |
| AP | GCGCCT | 1005.41 | 778  | 0.774 | <b>-0.256</b> |
| AP | GCACCG | 866.06  | 571  | 0.659 | <b>-0.417</b> |
| AP | GCGCCA | 970.35  | 595  | 0.613 | <b>-0.489</b> |
| AQ | GCCCAG | 7143.67 | 9550 | 1.337 | <b>0.290</b>  |
| AQ | GCGCAG | 1931.51 | 2101 | 1.088 | <b>0.084</b>  |
| AQ | GCACAA | 1472.79 | 1416 | 0.961 | <b>-0.039</b> |
| AQ | GCTCAA | 1682.42 | 1522 | 0.905 | <b>-0.100</b> |
| AQ | GCTCAG | 4698.04 | 4141 | 0.881 | <b>-0.126</b> |
| AQ | GCACAG | 4112.65 | 3374 | 0.820 | <b>-0.198</b> |
| AQ | GCCCCA | 2558.23 | 1943 | 0.760 | <b>-0.275</b> |
| AQ | GCGCAA | 691.70  | 244  | 0.353 | <b>-1.042</b> |
| AR | GCGCGC | 580.17  | 1255 | 2.163 | <b>0.772</b>  |
| AR | GCGCGG | 634.54  | 1175 | 1.852 | <b>0.616</b>  |
| AR | GCCCCG | 2346.82 | 3946 | 1.681 | <b>0.520</b>  |
| AR | GCCCCC | 2145.76 | 3135 | 1.461 | <b>0.379</b>  |
| AR | GCCAGG | 2323.57 | 3242 | 1.395 | <b>0.333</b>  |
| AR | GCAAGA | 1362.59 | 1559 | 1.144 | <b>0.135</b>  |

|    |         |         |      |       |               |
|----|---------|---------|------|-------|---------------|
| AR | GCTCGA  | 836.64  | 943  | 1.127 | <b>0.120</b>  |
| AR | GCCCCGA | 1272.16 | 1418 | 1.115 | <b>0.109</b>  |
| AR | GCCCCGT | 918.67  | 935  | 1.018 | <b>0.018</b>  |
| AR | GCTCGT  | 604.17  | 595  | 0.985 | <b>-0.015</b> |
| AR | GCCAGA  | 2366.81 | 2219 | 0.938 | <b>-0.064</b> |
| AR | GCTCGG  | 1543.39 | 1295 | 0.839 | <b>-0.175</b> |
| AR | GCGCGT  | 248.39  | 205  | 0.825 | <b>-0.192</b> |
| AR | GCAAGG  | 1337.69 | 1089 | 0.814 | <b>-0.206</b> |
| AR | GCGAGG  | 628.25  | 486  | 0.774 | <b>-0.257</b> |
| AR | GCACGA  | 732.39  | 533  | 0.728 | <b>-0.318</b> |
| AR | GCTCGC  | 1411.16 | 941  | 0.667 | <b>-0.405</b> |
| AR | GCGCGA  | 343.97  | 226  | 0.657 | <b>-0.420</b> |
| AR | GCACGT  | 528.89  | 338  | 0.639 | <b>-0.448</b> |
| AR | GCACGG  | 1351.08 | 859  | 0.636 | <b>-0.453</b> |
| AR | GCACGC  | 1235.33 | 619  | 0.501 | <b>-0.691</b> |
| AR | GCTAGA  | 1556.53 | 714  | 0.459 | <b>-0.779</b> |
| AR | GCGAGA  | 639.94  | 263  | 0.411 | <b>-0.889</b> |
| AR | GCTAGG  | 1528.10 | 487  | 0.319 | <b>-1.144</b> |
| AS | GCCTCG  | 963.41  | 1977 | 2.052 | <b>0.719</b>  |
| AS | GCGTCG  | 260.49  | 465  | 1.785 | <b>0.579</b>  |
| AS | GCCAGC  | 4127.58 | 6466 | 1.567 | <b>0.449</b>  |
| AS | GCCTCC  | 3643.21 | 5443 | 1.494 | <b>0.401</b>  |
| AS | GCTTCT  | 2084.25 | 2488 | 1.194 | <b>0.177</b>  |
| AS | GCCAGT  | 2604.12 | 3085 | 1.185 | <b>0.169</b>  |
| AS | GCATCT  | 1824.55 | 2154 | 1.181 | <b>0.166</b>  |
| AS | GCTTCA  | 1684.99 | 1932 | 1.147 | <b>0.137</b>  |
| AS | GCGTCC  | 985.05  | 1079 | 1.095 | <b>0.091</b>  |
| AS | GCATCA  | 1475.04 | 1531 | 1.038 | <b>0.037</b>  |
| AS | GCCTCT  | 3169.23 | 3235 | 1.021 | <b>0.021</b>  |
| AS | GCCTCA  | 2562.14 | 2514 | 0.981 | <b>-0.019</b> |
| AS | GCTTCC  | 2395.96 | 2295 | 0.958 | <b>-0.043</b> |
| AS | GCAAGT  | 1499.21 | 1307 | 0.872 | <b>-0.137</b> |
| AS | GCTTCG  | 633.59  | 516  | 0.814 | <b>-0.205</b> |
| AS | GCATCC  | 2097.42 | 1658 | 0.790 | <b>-0.235</b> |
| AS | GCATCG  | 554.64  | 403  | 0.727 | <b>-0.319</b> |
| AS | GCGTCT  | 856.90  | 521  | 0.608 | <b>-0.498</b> |
| AS | GCGAGC  | 1116.02 | 595  | 0.533 | <b>-0.629</b> |
| AS | GCGTCA  | 692.75  | 319  | 0.460 | <b>-0.775</b> |
| AS | GCAAGC  | 2376.27 | 1080 | 0.454 | <b>-0.789</b> |
| AS | GCTAGT  | 1712.60 | 737  | 0.430 | <b>-0.843</b> |
| AS | GCGAGT  | 704.10  | 265  | 0.376 | <b>-0.977</b> |
| AS | GCTAGC  | 2714.51 | 673  | 0.248 | <b>-1.395</b> |
| AT | GCCACG  | 1262.40 | 2478 | 1.963 | <b>0.674</b>  |
| AT | GCCACC  | 3842.98 | 6598 | 1.717 | <b>0.541</b>  |
| AT | GCCACA  | 3111.04 | 4031 | 1.296 | <b>0.259</b>  |
| AT | GCCACT  | 2751.18 | 3205 | 1.165 | <b>0.153</b>  |
| AT | GCAACA  | 1791.05 | 1761 | 0.983 | <b>-0.017</b> |
| AT | GCGACG  | 341.33  | 329  | 0.964 | <b>-0.037</b> |
| AT | GCAACT  | 1583.87 | 1509 | 0.953 | <b>-0.048</b> |
| AT | GCTACT  | 1809.31 | 1395 | 0.771 | <b>-0.260</b> |
| AT | GCTACA  | 2045.98 | 1528 | 0.747 | <b>-0.292</b> |
| AT | GCGACC  | 1039.07 | 601  | 0.578 | <b>-0.547</b> |
| AT | GCAACC  | 2212.43 | 1259 | 0.569 | <b>-0.564</b> |

|    |        |         |      |       |        |
|----|--------|---------|------|-------|--------|
| AT | GCTACC | 2527.34 | 1364 | 0.540 | -0.617 |
| AT | GCAACG | 726.77  | 384  | 0.528 | -0.638 |
| AT | GCTACG | 830.22  | 363  | 0.437 | -0.827 |
| AT | GCGACT | 743.87  | 308  | 0.414 | -0.882 |
| AT | GCGACA | 841.17  | 347  | 0.413 | -0.885 |
| AV | GCTGTT | 1736.99 | 3025 | 1.742 | 0.555  |
| AV | GCTGTG | 4399.56 | 7279 | 1.654 | 0.503  |
| AV | GCTGTA | 1127.89 | 1750 | 1.552 | 0.439  |
| AV | GCTGTC | 2223.90 | 3351 | 1.507 | 0.410  |
| AV | GCAGTA | 987.35  | 1401 | 1.419 | 0.350  |
| AV | GCGGTG | 1808.80 | 2487 | 1.375 | 0.318  |
| AV | GCAGTT | 1520.56 | 2087 | 1.373 | 0.317  |
| AV | GCAGTG | 3851.36 | 4349 | 1.129 | 0.122  |
| AV | GCGGTC | 914.32  | 883  | 0.966 | -0.035 |
| AV | GCAGTC | 1946.80 | 1806 | 0.928 | -0.075 |
| AV | GCCGTG | 6689.81 | 4322 | 0.646 | -0.437 |
| AV | GCGGTT | 714.13  | 423  | 0.592 | -0.524 |
| AV | GCGGTA | 463.71  | 270  | 0.582 | -0.541 |
| AV | GCCGTC | 3381.59 | 1798 | 0.532 | -0.632 |
| AV | GCCGTT | 2641.21 | 563  | 0.213 | -1.546 |
| AV | GCCGTA | 1715.03 | 329  | 0.192 | -1.651 |
| AW | GCCTGG | 2528.22 | 3848 | 1.522 | 0.420  |
| AW | GCGTGG | 683.58  | 558  | 0.816 | -0.203 |
| AW | GCTTGG | 1662.69 | 1066 | 0.641 | -0.445 |
| AW | GCATGG | 1455.51 | 858  | 0.589 | -0.529 |
| AY | GCCTAC | 2643.77 | 4073 | 1.541 | 0.432  |
| AY | GCCTAT | 2148.26 | 2457 | 1.144 | 0.134  |
| AY | GCTTAT | 1412.81 | 1478 | 1.046 | 0.045  |
| AY | GCATAT | 1236.77 | 1244 | 1.006 | 0.006  |
| AY | GCTTAC | 1738.68 | 1139 | 0.655 | -0.423 |
| AY | GCGTAC | 714.83  | 429  | 0.600 | -0.511 |
| AY | GCATAC | 1522.04 | 868  | 0.570 | -0.562 |
| AY | GCGTAT | 580.85  | 310  | 0.534 | -0.628 |
| CA | TGTGCT | 1164.04 | 2021 | 1.736 | 0.552  |
| CA | TGTGCC | 1769.99 | 2992 | 1.690 | 0.525  |
| CA | TGTGCA | 1019.00 | 1708 | 1.676 | 0.517  |
| CA | TGTGCG | 478.57  | 477  | 0.997 | -0.003 |
| CA | TGCGCG | 568.18  | 502  | 0.884 | -0.124 |
| CA | TGCGCC | 2101.42 | 1313 | 0.625 | -0.470 |
| CA | TGCGCT | 1382.00 | 368  | 0.266 | -1.323 |
| CA | TGCGCA | 1209.80 | 312  | 0.258 | -1.355 |
| CC | TGCTGC | 1534.17 | 2610 | 1.701 | 0.531  |
| CC | TGCTGT | 1292.21 | 1571 | 1.216 | 0.195  |
| CC | TGTTGT | 1088.41 | 529  | 0.486 | -0.721 |
| CC | TGTTGC | 1292.21 | 497  | 0.385 | -0.956 |
| CD | TGTGAC | 1920.20 | 3470 | 1.807 | 0.592  |
| CD | TGTGAT | 1699.87 | 2853 | 1.678 | 0.518  |
| CD | TGCGAC | 2279.75 | 1134 | 0.497 | -0.698 |
| CD | TGCGAT | 2018.17 | 461  | 0.228 | -1.477 |
| CE | TGTGAA | 1901.69 | 3636 | 1.912 | 0.648  |
| CE | TGTGAG | 2543.16 | 3935 | 1.547 | 0.437  |
| CE | TGCGAG | 3019.37 | 1709 | 0.566 | -0.569 |
| CE | TGCGAA | 2257.78 | 442  | 0.196 | -1.631 |

|    |         |         |      |       |               |
|----|---------|---------|------|-------|---------------|
| CF | TGCTTC  | 1891.74 | 2684 | 1.419 | <b>0.350</b>  |
| CF | TGCTTT  | 1652.78 | 1685 | 1.019 | <b>0.019</b>  |
| CF | TGTTTT  | 1392.11 | 1096 | 0.787 | <b>-0.239</b> |
| CF | TGTTTC  | 1593.38 | 1065 | 0.668 | <b>-0.403</b> |
| CG | TGTGGG  | 1594.78 | 3240 | 2.032 | <b>0.709</b>  |
| CG | TGTGGA  | 1633.57 | 2846 | 1.742 | <b>0.555</b>  |
| CG | TGTGGT  | 1057.61 | 1627 | 1.538 | <b>0.431</b>  |
| CG | TGTGGC  | 2214.90 | 3133 | 1.415 | <b>0.347</b>  |
| CG | TGCGGG  | 1893.40 | 1137 | 0.601 | <b>-0.510</b> |
| CG | TGCGGC  | 2629.63 | 1461 | 0.556 | <b>-0.588</b> |
| CG | TGCGGT  | 1255.64 | 344  | 0.274 | <b>-1.295</b> |
| CG | TGCGGA  | 1939.46 | 431  | 0.222 | <b>-1.504</b> |
| CH | TGCCAC  | 1618.50 | 2144 | 1.325 | <b>0.281</b>  |
| CH | TGCCAT  | 1173.68 | 1253 | 1.068 | <b>0.065</b>  |
| CH | TGTCAT  | 988.58  | 831  | 0.841 | <b>-0.174</b> |
| CH | TGTCAC  | 1363.24 | 916  | 0.672 | <b>-0.398</b> |
| CI | TGCATC  | 1821.04 | 2813 | 1.545 | <b>0.435</b>  |
| CI | TGCATT  | 1440.05 | 1579 | 1.096 | <b>0.092</b>  |
| CI | TGCATA  | 662.30  | 576  | 0.870 | <b>-0.140</b> |
| CI | TGTATA  | 557.84  | 474  | 0.850 | <b>-0.163</b> |
| CI | TGTATT  | 1212.94 | 927  | 0.764 | <b>-0.269</b> |
| CI | TGTATC  | 1533.83 | 859  | 0.560 | <b>-0.580</b> |
| CK | TGCAAG  | 2777.53 | 3348 | 1.205 | <b>0.187</b>  |
| CK | TGCAAA  | 2144.62 | 2441 | 1.138 | <b>0.129</b>  |
| CK | TGTAAG  | 1806.38 | 1770 | 0.980 | <b>-0.020</b> |
| CK | TGTAAG  | 2339.47 | 1509 | 0.645 | <b>-0.438</b> |
| CL | TGCCCTC | 1722.14 | 2468 | 1.433 | <b>0.360</b>  |
| CL | TGCCCTG | 3578.83 | 4525 | 1.264 | <b>0.235</b>  |
| CL | TGTTTA  | 583.38  | 704  | 1.207 | <b>0.188</b>  |
| CL | TGCCCTT | 1187.49 | 1384 | 1.165 | <b>0.153</b>  |
| CL | TGTTTG  | 980.04  | 1079 | 1.101 | <b>0.096</b>  |
| CL | TGCTTG  | 1163.55 | 1179 | 1.013 | <b>0.013</b>  |
| CL | TGTCTT  | 1000.21 | 940  | 0.940 | <b>-0.062</b> |
| CL | TGCCCTA | 640.41  | 585  | 0.913 | <b>-0.090</b> |
| CL | TGTCTA  | 539.40  | 481  | 0.892 | <b>-0.115</b> |
| CL | TGCTTA  | 692.62  | 565  | 0.816 | <b>-0.204</b> |
| CL | TGTCTC  | 1450.53 | 1010 | 0.696 | <b>-0.362</b> |
| CL | TGTCTG  | 3014.39 | 1633 | 0.542 | <b>-0.613</b> |
| CM | TGCATG  | 1518.22 | 1979 | 1.304 | <b>0.265</b>  |
| CM | TGTATG  | 1278.78 | 818  | 0.640 | <b>-0.447</b> |
| CN | TGCAAC  | 1825.04 | 2351 | 1.288 | <b>0.253</b>  |
| CN | TGCAAT  | 1657.05 | 1636 | 0.987 | <b>-0.013</b> |
| CN | TGTAAT  | 1395.71 | 1349 | 0.967 | <b>-0.034</b> |
| CN | TGTAAC  | 1537.20 | 1079 | 0.702 | <b>-0.354</b> |
| CP | TGCCCCG | 687.28  | 978  | 1.423 | <b>0.353</b>  |
| CP | TGCCCC  | 1896.80 | 2279 | 1.201 | <b>0.184</b>  |
| CP | TGCCCA  | 1639.61 | 1728 | 1.054 | <b>0.053</b>  |
| CP | TGCCCT  | 1698.85 | 1690 | 0.995 | <b>-0.005</b> |
| CP | TGTCCT  | 1430.91 | 1333 | 0.932 | <b>-0.071</b> |
| CP | TGTCCA  | 1381.01 | 1263 | 0.915 | <b>-0.089</b> |
| CP | TGTCCC  | 1597.65 | 1369 | 0.857 | <b>-0.154</b> |
| CP | TGTCCG  | 578.88  | 271  | 0.468 | <b>-0.759</b> |
| CQ | TGCCAG  | 3338.89 | 4321 | 1.294 | <b>0.258</b>  |

|    |         |         |      |       |               |
|----|---------|---------|------|-------|---------------|
| CQ | TGCCAA  | 1195.69 | 1319 | 1.103 | <b>0.098</b>  |
| CQ | TGTCAA  | 1007.11 | 905  | 0.899 | <b>-0.107</b> |
| CQ | TGTCAG  | 2812.30 | 1809 | 0.643 | <b>-0.441</b> |
| CR | TGCCGC  | 1031.52 | 1860 | 1.803 | <b>0.590</b>  |
| CR | TGCCGG  | 1128.18 | 1543 | 1.368 | <b>0.313</b>  |
| CR | TGCAGG  | 1117.00 | 1450 | 1.298 | <b>0.261</b>  |
| CR | TGCCGT  | 441.63  | 541  | 1.225 | <b>0.203</b>  |
| CR | TGCCGA  | 611.56  | 742  | 1.213 | <b>0.193</b>  |
| CR | TGCAGA  | 1137.78 | 1252 | 1.100 | <b>0.096</b>  |
| CR | TGTCGA  | 515.11  | 458  | 0.889 | <b>-0.118</b> |
| CR | TGTCGT  | 371.98  | 308  | 0.828 | <b>-0.189</b> |
| CR | TGTAGA  | 958.34  | 570  | 0.595 | <b>-0.520</b> |
| CR | TGTCGC  | 868.83  | 497  | 0.572 | <b>-0.559</b> |
| CR | TGTCGG  | 950.24  | 463  | 0.487 | <b>-0.719</b> |
| CR | TGTAGG  | 940.83  | 389  | 0.413 | <b>-0.883</b> |
| CS | TGCAGC  | 1990.73 | 3150 | 1.582 | <b>0.459</b>  |
| CS | TGCTCC  | 1757.12 | 2397 | 1.364 | <b>0.311</b>  |
| CS | TGCAGT  | 1255.97 | 1701 | 1.354 | <b>0.303</b>  |
| CS | TGCTCG  | 464.65  | 571  | 1.229 | <b>0.206</b>  |
| CS | TGTTCT  | 1287.45 | 1184 | 0.920 | <b>-0.084</b> |
| CS | TGCTCT  | 1528.52 | 1393 | 0.911 | <b>-0.093</b> |
| CS | TGTTCA  | 1040.83 | 932  | 0.895 | <b>-0.110</b> |
| CS | TGCTCA  | 1235.72 | 1079 | 0.873 | <b>-0.136</b> |
| CS | TGTTCC  | 1479.99 | 1102 | 0.745 | <b>-0.295</b> |
| CS | TGTAGT  | 1057.88 | 699  | 0.661 | <b>-0.414</b> |
| CS | TGTTCG  | 391.37  | 192  | 0.491 | <b>-0.712</b> |
| CS | TGTAGC  | 1676.76 | 767  | 0.457 | <b>-0.782</b> |
| CT | TGCACG  | 535.88  | 829  | 1.547 | <b>0.436</b>  |
| CT | TGCACC  | 1631.31 | 2321 | 1.423 | <b>0.353</b>  |
| CT | TGCACA  | 1320.60 | 1508 | 1.142 | <b>0.133</b>  |
| CT | TGCACT  | 1167.85 | 1185 | 1.015 | <b>0.015</b>  |
| CT | TGTA CT | 983.66  | 802  | 0.815 | <b>-0.204</b> |
| CT | TGTACA  | 1112.32 | 830  | 0.746 | <b>-0.293</b> |
| CT | TGTACC  | 1374.02 | 942  | 0.686 | <b>-0.377</b> |
| CT | TGTACG  | 451.36  | 160  | 0.354 | <b>-1.037</b> |
| CV | TGTGTC  | 1064.94 | 1821 | 1.710 | <b>0.536</b>  |
| CV | TGTGTT  | 831.78  | 1383 | 1.663 | <b>0.508</b>  |
| CV | TGTGTA  | 540.10  | 866  | 1.603 | <b>0.472</b>  |
| CV | TGTGTG  | 2106.78 | 3241 | 1.538 | <b>0.431</b>  |
| CV | TGCGTG  | 2501.27 | 1537 | 0.614 | <b>-0.487</b> |
| CV | TGCGTC  | 1264.35 | 734  | 0.581 | <b>-0.544</b> |
| CV | TGCGTT  | 987.53  | 219  | 0.222 | <b>-1.506</b> |
| CV | TGCGTA  | 641.24  | 137  | 0.214 | <b>-1.543</b> |
| CW | TGCTGG  | 1275.05 | 1842 | 1.445 | <b>0.368</b>  |
| CW | TGTTGG  | 1073.95 | 507  | 0.472 | <b>-0.751</b> |
| CY | TGCTAC  | 1379.34 | 1995 | 1.446 | <b>0.369</b>  |
| CY | TGCTAT  | 1120.82 | 1170 | 1.044 | <b>0.043</b>  |
| CY | TGTTAT  | 944.05  | 653  | 0.692 | <b>-0.369</b> |
| CY | TGTTAC  | 1161.80 | 788  | 0.678 | <b>-0.388</b> |
| DA | GATGCT  | 2675.13 | 5292 | 1.978 | <b>0.682</b>  |
| DA | GATGCA  | 2341.80 | 3898 | 1.665 | <b>0.510</b>  |
| DA | GATGCC  | 4067.71 | 5983 | 1.471 | <b>0.386</b>  |
| DA | GACGCG  | 1242.39 | 1116 | 0.898 | <b>-0.107</b> |



|    |         |         |       |       |        |
|----|---------|---------|-------|-------|--------|
| DA | GATGCG  | 1099.83 | 972   | 0.884 | -0.124 |
| DA | GACGCC  | 4594.94 | 2668  | 0.581 | -0.544 |
| DA | GACGCA  | 2645.34 | 852   | 0.322 | -1.133 |
| DA | GACGCT  | 3021.87 | 908   | 0.300 | -1.202 |
| DC | GACTGC  | 2386.86 | 3465  | 1.452 | 0.373  |
| DC | GACTGT  | 2010.41 | 2804  | 1.395 | 0.333  |
| DC | GATTGT  | 1779.74 | 1163  | 0.653 | -0.425 |
| DC | GATTGC  | 2112.99 | 858   | 0.406 | -0.901 |
| DD | GATGAT  | 4271.42 | 7846  | 1.837 | 0.608  |
| DD | GATGAC  | 4825.06 | 7181  | 1.488 | 0.398  |
| DD | GACGAC  | 5450.46 | 2965  | 0.544 | -0.609 |
| DD | GACGAT  | 4825.06 | 1380  | 0.286 | -1.252 |
| DE | GATGAA  | 5114.33 | 10045 | 1.964 | 0.675  |
| DE | GATGAG  | 6839.48 | 9573  | 1.400 | 0.336  |
| DE | GACGAG  | 7725.97 | 4498  | 0.582 | -0.541 |
| DE | GACGAA  | 5777.22 | 1341  | 0.232 | -1.461 |
| DF | GACTTC  | 4696.28 | 6094  | 1.298 | 0.261  |
| DF | GACTTT  | 4103.05 | 4250  | 1.036 | 0.035  |
| DF | GATTTT  | 3632.26 | 3485  | 0.959 | -0.041 |
| DF | GAT TTC | 4157.42 | 2760  | 0.664 | -0.410 |
| DG | GATGGT  | 1910.36 | 3443  | 1.802 | 0.589  |
| DG | GATGGA  | 2950.72 | 5133  | 1.740 | 0.554  |
| DG | GATGGG  | 2880.65 | 4437  | 1.540 | 0.432  |
| DG | GATGGC  | 4000.77 | 5419  | 1.354 | 0.303  |
| DG | GACGGC  | 4519.33 | 2987  | 0.661 | -0.414 |
| DG | GACGGG  | 3254.02 | 1979  | 0.608 | -0.497 |
| DG | GACGGT  | 2157.97 | 723   | 0.335 | -1.094 |
| DG | GACGGA  | 3333.18 | 886   | 0.266 | -1.325 |
| DH | GACCAC  | 2653.74 | 3480  | 1.311 | 0.271  |
| DH | GACCAT  | 1924.41 | 2014  | 1.047 | 0.046  |
| DH | GATCAT  | 1703.60 | 1623  | 0.953 | -0.048 |
| DH | GATCAC  | 2349.25 | 1514  | 0.644 | -0.439 |
| DI | GACATC  | 4715.94 | 6532  | 1.385 | 0.326  |
| DI | GACATT  | 3729.31 | 4087  | 1.096 | 0.092  |
| DI | GATATT  | 3301.40 | 3271  | 0.991 | -0.009 |
| DI | GATATA  | 1518.36 | 1495  | 0.985 | -0.016 |
| DI | GACATA  | 1715.16 | 1565  | 0.912 | -0.092 |
| DI | GATATC  | 4174.83 | 2205  | 0.528 | -0.638 |
| DK | GACAAG  | 5562.52 | 7324  | 1.317 | 0.275  |
| DK | GACAAA  | 4295.02 | 4794  | 1.116 | 0.110  |
| DK | GATAAA  | 3802.20 | 3855  | 1.014 | 0.014  |
| DK | GATAAG  | 4924.27 | 2611  | 0.530 | -0.634 |
| DL | GACCTC  | 3785.97 | 5029  | 1.328 | 0.284  |
| DL | GACTTG  | 2557.95 | 3396  | 1.328 | 0.283  |
| DL | GATTTA  | 1347.95 | 1740  | 1.291 | 0.255  |
| DL | GACCTG  | 7867.71 | 9796  | 1.245 | 0.219  |
| DL | GATTTG  | 2264.44 | 2687  | 1.187 | 0.171  |
| DL | GACCTT  | 2610.58 | 2774  | 1.063 | 0.061  |
| DL | GATCTT  | 2311.04 | 2416  | 1.045 | 0.044  |
| DL | GACCTA  | 1407.87 | 1416  | 1.006 | 0.006  |
| DL | GACTTA  | 1522.66 | 1403  | 0.921 | -0.082 |
| DL | GATCTA  | 1246.33 | 1020  | 0.818 | -0.200 |
| DL | GATCTC  | 3351.56 | 2214  | 0.661 | -0.415 |



|    |         |         |      |       |               |
|----|---------|---------|------|-------|---------------|
| DL | GATCTG  | 6964.95 | 3348 | 0.481 | <b>-0.733</b> |
| DM | GACATG  | 4089.63 | 5411 | 1.323 | <b>0.280</b>  |
| DM | GATATG  | 3620.37 | 2299 | 0.635 | <b>-0.454</b> |
| DN | GACAAC  | 3511.00 | 4849 | 1.381 | <b>0.323</b>  |
| DN | GACAAT  | 3187.82 | 3349 | 1.051 | <b>0.049</b>  |
| DN | GATAAT  | 2822.05 | 2549 | 0.903 | <b>-0.102</b> |
| DN | GATAAC  | 3108.14 | 1882 | 0.606 | <b>-0.502</b> |
| DP | GACCCC  | 3732.11 | 5119 | 1.372 | <b>0.316</b>  |
| DP | GACCCG  | 1352.28 | 1692 | 1.251 | <b>0.224</b>  |
| DP | GACCCT  | 3342.62 | 3700 | 1.107 | <b>0.102</b>  |
| DP | GATCCT  | 2959.08 | 3111 | 1.051 | <b>0.050</b>  |
| DP | GACCCA  | 3226.05 | 3205 | 0.993 | <b>-0.007</b> |
| DP | GATCCA  | 2855.89 | 2349 | 0.823 | <b>-0.195</b> |
| DP | GATCCC  | 3303.88 | 2338 | 0.708 | <b>-0.346</b> |
| DP | GATCCG  | 1197.11 | 455  | 0.380 | <b>-0.967</b> |
| DQ | GACCAG  | 5250.37 | 6524 | 1.243 | <b>0.217</b>  |
| DQ | GACCAA  | 1880.22 | 2169 | 1.154 | <b>0.143</b>  |
| DQ | GATCAA  | 1664.48 | 1808 | 1.086 | <b>0.083</b>  |
| DQ | GATCAG  | 4647.93 | 2942 | 0.633 | <b>-0.457</b> |
| DR | GACCGC  | 1807.77 | 2634 | 1.457 | <b>0.376</b>  |
| DR | GACAGA  | 1994.00 | 2869 | 1.439 | <b>0.364</b>  |
| DR | GACAGG  | 1957.57 | 2730 | 1.395 | <b>0.333</b>  |
| DR | GACCGT  | 773.97  | 1029 | 1.330 | <b>0.285</b>  |
| DR | GACCGG  | 1977.16 | 2568 | 1.299 | <b>0.261</b>  |
| DR | GACCGA  | 1071.78 | 1292 | 1.205 | <b>0.187</b>  |
| DR | GATCGA  | 948.80  | 923  | 0.973 | <b>-0.028</b> |
| DR | GATCGT  | 685.16  | 626  | 0.914 | <b>-0.090</b> |
| DR | GATAGA  | 1765.20 | 1123 | 0.636 | <b>-0.452</b> |
| DR | GATCGG  | 1750.30 | 859  | 0.491 | <b>-0.712</b> |
| DR | GATCGC  | 1600.34 | 754  | 0.471 | <b>-0.753</b> |
| DR | GATAGG  | 1732.96 | 658  | 0.380 | <b>-0.968</b> |
| DS | GACTCG  | 918.57  | 1527 | 1.662 | <b>0.508</b>  |
| DS | GACAGC  | 3935.48 | 6143 | 1.561 | <b>0.445</b>  |
| DS | GACAGT  | 2482.92 | 3657 | 1.473 | <b>0.387</b>  |
| DS | GATTCT  | 2675.01 | 2968 | 1.110 | <b>0.104</b>  |
| DS | GACTCC  | 3473.65 | 3800 | 1.094 | <b>0.090</b>  |
| DS | GATTCA  | 2162.59 | 2129 | 0.984 | <b>-0.016</b> |
| DS | GACTCA  | 2442.89 | 2382 | 0.975 | <b>-0.025</b> |
| DS | GACTCT  | 3021.73 | 2910 | 0.963 | <b>-0.038</b> |
| DS | GATTCC  | 3075.07 | 2186 | 0.711 | <b>-0.341</b> |
| DS | GATAGT  | 2198.02 | 1355 | 0.616 | <b>-0.484</b> |
| DS | GATTCCG | 813.17  | 414  | 0.509 | <b>-0.675</b> |
| DS | GATAGC  | 3483.91 | 1212 | 0.348 | <b>-1.056</b> |
| DT | GACACG  | 1110.58 | 1842 | 1.659 | <b>0.506</b>  |
| DT | GACACC  | 3380.79 | 4666 | 1.380 | <b>0.322</b>  |
| DT | GACACA  | 2736.88 | 3538 | 1.293 | <b>0.257</b>  |
| DT | GCACT   | 2420.30 | 2688 | 1.111 | <b>0.105</b>  |
| DT | GATACT  | 2142.59 | 1731 | 0.808 | <b>-0.213</b> |
| DT | GATACA  | 2422.85 | 1788 | 0.738 | <b>-0.304</b> |
| DT | GATACC  | 2992.87 | 1586 | 0.530 | <b>-0.635</b> |
| DT | GATACG  | 983.15  | 351  | 0.357 | <b>-1.030</b> |
| DV | GATGTT  | 1957.96 | 3699 | 1.889 | <b>0.636</b>  |
| DV | GATGTA  | 1271.37 | 2214 | 1.741 | <b>0.555</b>  |

|    |        |          |       |       |               |
|----|--------|----------|-------|-------|---------------|
| DV | GATGTC | 2506.81  | 3869  | 1.543 | <b>0.434</b>  |
| DV | GATGTG | 4959.23  | 6668  | 1.345 | <b>0.296</b>  |
| DV | GACGTG | 5602.02  | 3616  | 0.645 | <b>-0.438</b> |
| DV | GACGTC | 2831.73  | 1654  | 0.584 | <b>-0.538</b> |
| DV | GACGTT | 2211.73  | 672   | 0.304 | <b>-1.191</b> |
| DV | GACGTA | 1436.16  | 385   | 0.268 | <b>-1.316</b> |
| DW | GACTGG | 2619.27  | 3853  | 1.471 | <b>0.386</b>  |
| DW | GATTGG | 2318.73  | 1085  | 0.468 | <b>-0.759</b> |
| DY | GACTAC | 3307.71  | 3930  | 1.188 | <b>0.172</b>  |
| DY | GATTAT | 2379.36  | 2608  | 1.096 | <b>0.092</b>  |
| DY | GACTAT | 2687.76  | 2853  | 1.061 | <b>0.060</b>  |
| DY | GATTAC | 2928.18  | 1912  | 0.653 | <b>-0.426</b> |
| EA | GAGGCG | 2437.29  | 3179  | 1.304 | <b>0.266</b>  |
| EA | GAAGCA | 3880.59  | 4844  | 1.248 | <b>0.222</b>  |
| EA | GAAGCT | 4432.94  | 5143  | 1.160 | <b>0.149</b>  |
| EA | GAGGCC | 9014.27  | 9805  | 1.088 | <b>0.084</b>  |
| EA | GAGGCT | 5928.25  | 5314  | 0.896 | <b>-0.109</b> |
| EA | GAGGCA | 5189.57  | 4530  | 0.873 | <b>-0.136</b> |
| EA | GAAGCC | 6740.57  | 5649  | 0.838 | <b>-0.177</b> |
| EA | GAAGCG | 1822.52  | 982   | 0.539 | <b>-0.618</b> |
| EC | GAATGT | 2182.58  | 3541  | 1.622 | <b>0.484</b>  |
| EC | GAGTGT | 2918.80  | 2792  | 0.957 | <b>-0.044</b> |
| EC | GAGTGC | 3465.35  | 2987  | 0.862 | <b>-0.149</b> |
| EC | GAATGC | 2591.27  | 1838  | 0.709 | <b>-0.343</b> |
| ED | GAAGAT | 6605.82  | 9691  | 1.467 | <b>0.383</b>  |
| ED | GAGGAC | 9979.09  | 9684  | 0.970 | <b>-0.030</b> |
| ED | GAAGAC | 7462.02  | 6820  | 0.914 | <b>-0.090</b> |
| ED | GAGGAT | 8834.07  | 6686  | 0.757 | <b>-0.279</b> |
| EE | GAAGAA | 10747.11 | 14461 | 1.346 | <b>0.297</b>  |
| EE | GAGGAG | 19220.31 | 21731 | 1.131 | <b>0.123</b>  |
| EE | GAAGAG | 14372.29 | 11875 | 0.826 | <b>-0.191</b> |
| EE | GAGGAA | 14372.29 | 10645 | 0.741 | <b>-0.300</b> |
| EF | GAATTT | 3136.91  | 4237  | 1.351 | <b>0.301</b>  |
| EF | GAGTTC | 4801.58  | 4739  | 0.987 | <b>-0.013</b> |
| EF | GAGTTT | 4195.05  | 4095  | 0.976 | <b>-0.024</b> |
| EF | GAATTC | 3590.46  | 2653  | 0.739 | <b>-0.303</b> |
| EG | GAAGGA | 3358.73  | 5032  | 1.498 | <b>0.404</b>  |
| EG | GAAGGT | 2174.51  | 2839  | 1.306 | <b>0.267</b>  |
| EG | GAAGGG | 3278.97  | 3559  | 1.085 | <b>0.082</b>  |
| EG | GAGGGC | 6090.10  | 6505  | 1.068 | <b>0.066</b>  |
| EG | GAAGGC | 4553.97  | 4340  | 0.953 | <b>-0.048</b> |
| EG | GAGGGG | 4385.02  | 3795  | 0.865 | <b>-0.145</b> |
| EG | GAGGGT | 2908.01  | 2378  | 0.818 | <b>-0.201</b> |
| EG | GAGGGA | 4491.69  | 2793  | 0.622 | <b>-0.475</b> |
| EH | GAACAT | 2017.28  | 2539  | 1.259 | <b>0.230</b>  |
| EH | GAGCAC | 3720.16  | 4190  | 1.126 | <b>0.119</b>  |
| EH | GAGCAT | 2697.74  | 2448  | 0.907 | <b>-0.097</b> |
| EH | GAACAC | 2781.81  | 2040  | 0.733 | <b>-0.310</b> |
| EI | GAAATA | 1687.78  | 3007  | 1.782 | <b>0.578</b>  |
| EI | GAAATT | 3669.78  | 4788  | 1.305 | <b>0.266</b>  |
| EI | GAGATC | 6206.03  | 6191  | 0.998 | <b>-0.002</b> |
| EI | GAGATT | 4907.66  | 3978  | 0.811 | <b>-0.210</b> |
| EI | GAGATA | 2257.09  | 1785  | 0.791 | <b>-0.235</b> |

|    |         |          |       |       |               |
|----|---------|----------|-------|-------|---------------|
| EI | GAAATC  | 4640.66  | 3620  | 0.780 | <b>-0.248</b> |
| EK | GAGAAG  | 12729.57 | 15133 | 1.189 | <b>0.173</b>  |
| EK | GAAAAA  | 7349.75  | 7522  | 1.023 | <b>0.023</b>  |
| EK | GAGAAA  | 9828.94  | 9127  | 0.929 | <b>-0.074</b> |
| EK | GAAAAG  | 9518.74  | 7645  | 0.803 | <b>-0.219</b> |
| EL | GAGCTG  | 10945.64 | 15625 | 1.428 | <b>0.356</b>  |
| EL | GAATTA  | 1584.03  | 2256  | 1.424 | <b>0.354</b>  |
| EL | GAACTA  | 1464.61  | 1830  | 1.249 | <b>0.223</b>  |
| EL | GAACCT  | 2715.79  | 3371  | 1.241 | <b>0.216</b>  |
| EL | GAGCTC  | 5267.08  | 5877  | 1.116 | <b>0.110</b>  |
| EL | GAGCTA  | 1958.64  | 2049  | 1.046 | <b>0.045</b>  |
| EL | GAATTG  | 2661.03  | 2335  | 0.877 | <b>-0.131</b> |
| EL | GAGCTT  | 3631.87  | 3084  | 0.849 | <b>-0.164</b> |
| EL | GAGTTG  | 3558.64  | 2719  | 0.764 | <b>-0.269</b> |
| EL | GAACCTC | 3938.54  | 2632  | 0.668 | <b>-0.403</b> |
| EL | GAGTTA  | 2118.35  | 1357  | 0.641 | <b>-0.445</b> |
| EL | GAACCTG | 8184.78  | 4894  | 0.598 | <b>-0.514</b> |
| EM | GAAATG  | 4983.92  | 5010  | 1.005 | <b>0.005</b>  |
| EM | GAGATG  | 6665.08  | 6639  | 0.996 | <b>-0.004</b> |
| EN | GAAAAT  | 4791.73  | 6977  | 1.456 | <b>0.376</b>  |
| EN | GAGAAC  | 7057.70  | 6756  | 0.957 | <b>-0.044</b> |
| EN | GAAAAC  | 5277.51  | 4930  | 0.934 | <b>-0.068</b> |
| EN | GAGAAT  | 6408.07  | 4872  | 0.760 | <b>-0.274</b> |
| EP | GAGCCG  | 1650.94  | 2438  | 1.477 | <b>0.390</b>  |
| EP | GAGCCC  | 4556.38  | 6270  | 1.376 | <b>0.319</b>  |
| EP | GAGCCT  | 4080.86  | 4236  | 1.038 | <b>0.037</b>  |
| EP | GAGCCA  | 3938.55  | 4067  | 1.033 | <b>0.032</b>  |
| EP | GAACCA  | 2945.12  | 2684  | 0.911 | <b>-0.093</b> |
| EP | GAACCT  | 3051.53  | 2547  | 0.835 | <b>-0.181</b> |
| EP | GAACCC  | 3407.10  | 2106  | 0.618 | <b>-0.481</b> |
| EP | GAACCG  | 1234.52  | 517   | 0.419 | <b>-0.870</b> |
| EQ | GAACAA  | 2579.50  | 3396  | 1.317 | <b>0.275</b>  |
| EQ | GAGCAG  | 9632.80  | 11185 | 1.161 | <b>0.149</b>  |
| EQ | GAGCAA  | 3449.61  | 3185  | 0.923 | <b>-0.080</b> |
| EQ | GAACAG  | 7203.08  | 5099  | 0.708 | <b>-0.345</b> |
| ER | GAAAGA  | 2650.27  | 3769  | 1.422 | <b>0.352</b>  |
| ER | GAGAGG  | 3479.50  | 4315  | 1.240 | <b>0.215</b>  |
| ER | GAGCGG  | 3514.32  | 4356  | 1.240 | <b>0.215</b>  |
| ER | GAGCGC  | 3213.23  | 3682  | 1.146 | <b>0.136</b>  |
| ER | GAAAGG  | 2601.85  | 2679  | 1.030 | <b>0.029</b>  |
| ER | GAGAGA  | 3544.25  | 3633  | 1.025 | <b>0.025</b>  |
| ER | GAGCGT  | 1375.70  | 1286  | 0.935 | <b>-0.067</b> |
| ER | GAACGT  | 1028.70  | 894   | 0.869 | <b>-0.140</b> |
| ER | GAACGA  | 1424.52  | 1188  | 0.834 | <b>-0.182</b> |
| ER | GAGCGA  | 1905.04  | 1562  | 0.820 | <b>-0.199</b> |
| ER | GAACGG  | 2627.88  | 1333  | 0.507 | <b>-0.679</b> |
| ER | GAACGC  | 2402.74  | 1071  | 0.446 | <b>-0.808</b> |
| ES | GAAAGT  | 2081.93  | 3138  | 1.507 | <b>0.410</b>  |
| ES | GAGAGC  | 4413.03  | 5786  | 1.311 | <b>0.271</b>  |
| ES | GAGAGT  | 2784.21  | 3237  | 1.163 | <b>0.151</b>  |
| ES | GAGTCG  | 1030.03  | 1174  | 1.140 | <b>0.131</b>  |
| ES | GAATCT  | 2533.73  | 2812  | 1.110 | <b>0.104</b>  |
| ES | GAATCA  | 2048.37  | 2131  | 1.040 | <b>0.040</b>  |

|    |        |         |      |       |        |
|----|--------|---------|------|-------|--------|
| ES | GAAAGC | 3299.91 | 2880 | 0.873 | -0.136 |
| ES | GAGTCC | 3895.16 | 3392 | 0.871 | -0.138 |
| ES | GAGTCT | 3388.40 | 2799 | 0.826 | -0.191 |
| ES | GAGTCA | 2739.33 | 2198 | 0.802 | -0.220 |
| ES | GAATCC | 2912.67 | 1943 | 0.667 | -0.405 |
| ES | GAATCG | 770.22  | 407  | 0.528 | -0.638 |
| ET | GAGACG | 1658.42 | 2190 | 1.321 | 0.278  |
| ET | GAAACA | 3056.09 | 3851 | 1.260 | 0.231  |
| ET | GAAACT | 2702.59 | 3224 | 1.193 | 0.176  |
| ET | GAGACC | 5048.51 | 5514 | 1.092 | 0.088  |
| ET | GAGACA | 4086.97 | 3619 | 0.885 | -0.122 |
| ET | GAGACT | 3614.21 | 3028 | 0.838 | -0.177 |
| ET | GAAACC | 3775.11 | 2950 | 0.781 | -0.247 |
| ET | GAAACG | 1240.11 | 806  | 0.650 | -0.431 |
| EV | GAAGTA | 1580.16 | 2675 | 1.693 | 0.526  |
| EV | GAAGTT | 2433.50 | 3724 | 1.530 | 0.425  |
| EV | GAGGTG | 8242.83 | 9074 | 1.101 | 0.096  |
| EV | GAAGTC | 3115.66 | 2860 | 0.918 | -0.086 |
| EV | GAGGTC | 4166.62 | 3741 | 0.898 | -0.108 |
| EV | GAAGTG | 6163.71 | 5122 | 0.831 | -0.185 |
| EV | GAGGTT | 3254.36 | 2359 | 0.725 | -0.322 |
| EV | GAGGTA | 2113.17 | 1515 | 0.717 | -0.333 |
| EW | GAGTGG | 3085.08 | 3238 | 1.050 | 0.048  |
| EW | GAATGG | 2306.92 | 2154 | 0.934 | -0.069 |
| EY | GAATAT | 2307.55 | 3428 | 1.486 | 0.396  |
| EY | GAGTAC | 3797.72 | 3796 | 1.000 | 0.000  |
| EY | GAGTAT | 3085.93 | 2596 | 0.841 | -0.173 |
| EY | GAATAC | 2839.80 | 2211 | 0.779 | -0.250 |
| FA | TTTGCA | 1643.98 | 3299 | 2.007 | 0.696  |
| FA | TTTGCT | 1877.98 | 3746 | 1.995 | 0.690  |
| FA | TTTGCC | 2855.59 | 4348 | 1.523 | 0.420  |
| FA | TTTGCG | 772.10  | 622  | 0.806 | -0.216 |
| FA | TTCGCG | 883.73  | 598  | 0.677 | -0.391 |
| FA | TTCGCC | 3268.46 | 1802 | 0.551 | -0.595 |
| FA | TTCGCT | 2149.50 | 516  | 0.240 | -1.427 |
| FA | TTCGCA | 1881.67 | 402  | 0.214 | -1.543 |
| FC | TTCTGC | 2058.60 | 3045 | 1.479 | 0.391  |
| FC | TTCTGT | 1733.93 | 2055 | 1.185 | 0.170  |
| FC | TTTTGT | 1514.90 | 1159 | 0.765 | -0.268 |
| FC | TTTTGC | 1798.56 | 847  | 0.471 | -0.753 |
| FD | TTTGAT | 2786.65 | 5380 | 1.931 | 0.658  |
| FD | TTTGAC | 3147.84 | 4737 | 1.505 | 0.409  |
| FD | TTCGAC | 3602.96 | 1746 | 0.485 | -0.724 |
| FD | TTCGAT | 3189.55 | 864  | 0.271 | -1.306 |
| FE | TTTGAA | 3016.02 | 6247 | 2.071 | 0.728  |
| FE | TTTGAG | 4033.37 | 6066 | 1.504 | 0.408  |
| FE | TTCGAG | 4616.53 | 2165 | 0.469 | -0.757 |
| FE | TTCGAA | 3452.08 | 640  | 0.185 | -1.685 |
| FF | TTCTTC | 3429.53 | 5168 | 1.507 | 0.410  |
| FF | TTCTTT | 2996.32 | 2989 | 0.998 | -0.002 |
| FF | TTTTTT | 2617.83 | 1937 | 0.740 | -0.301 |
| FF | TTTTTC | 2996.32 | 1946 | 0.649 | -0.432 |
| FG | TTTGGA | 2068.21 | 4271 | 2.065 | 0.725  |

|    |         |         |      |       |               |
|----|---------|---------|------|-------|---------------|
| FG | TTTGGT  | 1339.00 | 2552 | 1.906 | <b>0.645</b>  |
| FG | TTTGGG  | 2019.09 | 3449 | 1.708 | <b>0.535</b>  |
| FG | TTTGGC  | 2804.20 | 3462 | 1.235 | <b>0.211</b>  |
| FG | TTCGGG  | 2311.02 | 1292 | 0.559 | <b>-0.581</b> |
| FG | TTCGGC  | 3209.64 | 1648 | 0.513 | <b>-0.667</b> |
| FG | TTCGGT  | 1532.60 | 419  | 0.273 | <b>-1.297</b> |
| FG | TTCGGA  | 2367.24 | 558  | 0.236 | <b>-1.445</b> |
| FH | TTCCAC  | 2463.48 | 3200 | 1.299 | <b>0.262</b>  |
| FH | TTTCAT  | 1560.78 | 1697 | 1.087 | <b>0.084</b>  |
| FH | TTCCAT  | 1786.44 | 1866 | 1.045 | <b>0.044</b>  |
| FH | TTTCAC  | 2152.30 | 1200 | 0.558 | <b>-0.584</b> |
| FI | TTCATC  | 3454.46 | 5156 | 1.493 | <b>0.400</b>  |
| FI | TTCATT  | 2731.75 | 2953 | 1.081 | <b>0.078</b>  |
| FI | TTTATT  | 2386.67 | 2296 | 0.962 | <b>-0.039</b> |
| FI | TTTATA  | 1097.66 | 950  | 0.865 | <b>-0.144</b> |
| FI | TTCATA  | 1256.36 | 1035 | 0.824 | <b>-0.194</b> |
| FI | TTTATC  | 3018.10 | 1555 | 0.515 | <b>-0.663</b> |
| FK | TTCAAG  | 4090.45 | 5137 | 1.256 | <b>0.228</b>  |
| FK | TTCAAA  | 3158.38 | 3245 | 1.027 | <b>0.027</b>  |
| FK | TTTAAA  | 2759.42 | 2762 | 1.001 | <b>0.001</b>  |
| FK | TTTAAG  | 3573.75 | 2438 | 0.682 | <b>-0.382</b> |
| FL | TTCCCTC | 3228.53 | 4426 | 1.371 | <b>0.315</b>  |
| FL | TTCCCTG | 6709.28 | 8734 | 1.302 | <b>0.264</b>  |
| FL | TTTTTA  | 1134.45 | 1334 | 1.176 | <b>0.162</b>  |
| FL | TTTCTT  | 1945.00 | 2267 | 1.166 | <b>0.153</b>  |
| FL | TTCCCTA | 1200.58 | 1280 | 1.066 | <b>0.064</b>  |
| FL | TTTCTA  | 1048.92 | 1087 | 1.036 | <b>0.036</b>  |
| FL | TTCTTG  | 2181.32 | 2239 | 1.026 | <b>0.026</b>  |
| FL | TTCCCTT | 2226.21 | 2150 | 0.966 | <b>-0.035</b> |
| FL | TTTTTG  | 1905.78 | 1799 | 0.944 | <b>-0.058</b> |
| FL | TTCTTA  | 1298.47 | 1144 | 0.881 | <b>-0.127</b> |
| FL | TTTCTC  | 2820.70 | 1904 | 0.675 | <b>-0.393</b> |
| FL | TTTCTG  | 5861.77 | 3197 | 0.545 | <b>-0.606</b> |
| FM | TTCATG  | 2804.11 | 3662 | 1.306 | <b>0.267</b>  |
| FM | TTTATG  | 2449.89 | 1592 | 0.650 | <b>-0.431</b> |
| FN | TTCAAC  | 2855.47 | 3919 | 1.372 | <b>0.317</b>  |
| FN | TTTAAT  | 2265.13 | 2185 | 0.965 | <b>-0.036</b> |
| FN | TTCAAT  | 2592.63 | 2456 | 0.947 | <b>-0.054</b> |
| FN | TTTAAC  | 2494.77 | 1648 | 0.661 | <b>-0.415</b> |
| FP | TTCCCCG | 961.40  | 1205 | 1.253 | <b>0.226</b>  |
| FP | TTTCCT  | 2076.25 | 2539 | 1.223 | <b>0.201</b>  |
| FP | TTCCCC  | 2653.35 | 3099 | 1.168 | <b>0.155</b>  |
| FP | TTTCCA  | 2003.85 | 2141 | 1.068 | <b>0.066</b>  |
| FP | TTCCCA  | 2293.57 | 2310 | 1.007 | <b>0.007</b>  |
| FP | TTCCCT  | 2376.44 | 2379 | 1.001 | <b>0.001</b>  |
| FP | TTTCCC  | 2318.18 | 1529 | 0.660 | <b>-0.416</b> |
| FP | TTTCCG  | 839.96  | 321  | 0.382 | <b>-0.962</b> |
| FQ | TTCCAG  | 5468.69 | 7069 | 1.293 | <b>0.257</b>  |
| FQ | TTTCAA  | 1711.02 | 1803 | 1.054 | <b>0.052</b>  |
| FQ | TTCCAA  | 1958.40 | 1980 | 1.011 | <b>0.011</b>  |
| FQ | TTTCAG  | 4777.89 | 3064 | 0.641 | <b>-0.444</b> |
| FR | TTCCGC  | 1531.47 | 2588 | 1.690 | <b>0.525</b>  |
| FR | TTCCGA  | 907.97  | 1410 | 1.553 | <b>0.440</b>  |

|    |         |         |      |       |               |
|----|---------|---------|------|-------|---------------|
| FR | TTCCGG  | 1674.97 | 2451 | 1.463 | <b>0.381</b>  |
| FR | TTCCGT  | 655.68  | 893  | 1.362 | <b>0.309</b>  |
| FR | TTCAGA  | 1689.24 | 1852 | 1.096 | <b>0.092</b>  |
| FR | TTCAGG  | 1658.38 | 1810 | 1.091 | <b>0.087</b>  |
| FR | TTTCGA  | 793.28  | 850  | 1.072 | <b>0.069</b>  |
| FR | TTTCGT  | 572.85  | 490  | 0.855 | <b>-0.156</b> |
| FR | TTTAGA  | 1475.86 | 947  | 0.642 | <b>-0.444</b> |
| FR | TTTAGG  | 1448.90 | 691  | 0.477 | <b>-0.740</b> |
| FR | TTTCGG  | 1463.39 | 688  | 0.470 | <b>-0.755</b> |
| FR | TTTCGC  | 1338.02 | 540  | 0.404 | <b>-0.907</b> |
| FS | TTCTCC  | 2990.83 | 4507 | 1.507 | <b>0.410</b>  |
| FS | TTCAGC  | 3388.47 | 4577 | 1.351 | <b>0.301</b>  |
| FS | TTCAGT  | 2137.80 | 2692 | 1.259 | <b>0.231</b>  |
| FS | TTCTCG  | 790.89  | 910  | 1.151 | <b>0.140</b>  |
| FS | TTTTCT  | 2273.08 | 2536 | 1.116 | <b>0.109</b>  |
| FS | TTCTCT  | 2601.73 | 2741 | 1.054 | <b>0.052</b>  |
| FS | TTTTCA  | 1837.65 | 1903 | 1.036 | <b>0.035</b>  |
| FS | TTCTCA  | 2103.34 | 1997 | 0.949 | <b>-0.052</b> |
| FS | TTTTCC  | 2613.03 | 1872 | 0.716 | <b>-0.334</b> |
| FS | TTTAGT  | 1867.76 | 1201 | 0.643 | <b>-0.442</b> |
| FS | TTTTCG  | 690.99  | 258  | 0.373 | <b>-0.985</b> |
| FS | TTTAGC  | 2960.44 | 1062 | 0.359 | <b>-1.025</b> |
| FT | TTCACC  | 2909.29 | 4513 | 1.551 | <b>0.439</b>  |
| FT | TTCACG  | 955.69  | 1315 | 1.376 | <b>0.319</b>  |
| FT | TTCACT  | 2082.75 | 2494 | 1.197 | <b>0.180</b>  |
| FT | TTCACA  | 2355.18 | 2372 | 1.007 | <b>0.007</b>  |
| FT | TTTACT  | 1819.66 | 1622 | 0.891 | <b>-0.115</b> |
| FT | TTTACA  | 2057.68 | 1485 | 0.722 | <b>-0.326</b> |
| FT | TTTACC  | 2541.79 | 1495 | 0.588 | <b>-0.531</b> |
| FT | TTTACG  | 834.97  | 261  | 0.313 | <b>-1.163</b> |
| FV | TTTGTA  | 912.19  | 1711 | 1.876 | <b>0.629</b>  |
| FV | TTTGTT  | 1404.80 | 2620 | 1.865 | <b>0.623</b>  |
| FV | TTTGTC  | 1798.60 | 2635 | 1.465 | <b>0.382</b>  |
| FV | TTTG TG | 3558.17 | 5206 | 1.463 | <b>0.381</b>  |
| FV | TTCGTG  | 4072.62 | 2589 | 0.636 | <b>-0.453</b> |
| FV | TTCGTC  | 2058.64 | 1086 | 0.528 | <b>-0.640</b> |
| FV | TTCGTT  | 1607.91 | 386  | 0.240 | <b>-1.427</b> |
| FV | TTCGTA  | 1044.07 | 224  | 0.215 | <b>-1.539</b> |
| FW | TTCTGG  | 2126.30 | 2834 | 1.333 | <b>0.287</b>  |
| FW | TTTTGG  | 1857.70 | 1150 | 0.619 | <b>-0.480</b> |
| FY | TTCTAC  | 2720.70 | 3710 | 1.364 | <b>0.310</b>  |
| FY | TTTTAT  | 1931.51 | 2003 | 1.037 | <b>0.036</b>  |
| FY | TTCTAT  | 2210.77 | 2145 | 0.970 | <b>-0.030</b> |
| FY | TTTTAC  | 2377.02 | 1382 | 0.581 | <b>-0.542</b> |
| GA | GGTGCT  | 1531.20 | 2505 | 1.636 | <b>0.492</b>  |
| GA | GGGGCG  | 949.27  | 1433 | 1.510 | <b>0.412</b>  |
| GA | GGGGCC  | 3510.85 | 5061 | 1.442 | <b>0.366</b>  |
| GA | GGTGCC  | 2328.29 | 3109 | 1.335 | <b>0.289</b>  |
| GA | GGAGCA  | 2070.38 | 2678 | 1.293 | <b>0.257</b>  |
| GA | GGTGCA  | 1340.41 | 1715 | 1.279 | <b>0.246</b>  |
| GA | GGCGCG  | 1318.38 | 1659 | 1.258 | <b>0.230</b>  |
| GA | GGAGCT  | 2365.08 | 2975 | 1.258 | <b>0.229</b>  |
| GA | GGGGCT  | 2308.91 | 2850 | 1.234 | <b>0.211</b>  |

|    |         |         |      |       |               |
|----|---------|---------|------|-------|---------------|
| GA | GGAGCC  | 3596.25 | 3845 | 1.069 | <b>0.067</b>  |
| GA | GGGGCA  | 2021.22 | 2074 | 1.026 | <b>0.026</b>  |
| GA | GGTGCG  | 629.52  | 501  | 0.796 | <b>-0.228</b> |
| GA | GGAGCG  | 972.36  | 712  | 0.732 | <b>-0.312</b> |
| GA | GGCGCC  | 4876.02 | 3121 | 0.640 | <b>-0.446</b> |
| GA | GGCGCT  | 3206.72 | 906  | 0.283 | <b>-1.264</b> |
| GA | GGCGCA  | 2807.15 | 688  | 0.245 | <b>-1.406</b> |
| GC | GGCTGC  | 1888.96 | 4102 | 2.172 | <b>0.775</b>  |
| GC | GGCTGT  | 1591.04 | 2360 | 1.483 | <b>0.394</b>  |
| GC | GGTTGT  | 759.72  | 658  | 0.866 | <b>-0.144</b> |
| GC | GGATGT  | 1173.45 | 793  | 0.676 | <b>-0.392</b> |
| GC | GGTTGC  | 901.97  | 523  | 0.580 | <b>-0.545</b> |
| GC | GGATGC  | 1393.18 | 655  | 0.470 | <b>-0.755</b> |
| GC | GGGTGC  | 1360.09 | 628  | 0.462 | <b>-0.773</b> |
| GC | GGGTGT  | 1145.59 | 495  | 0.432 | <b>-0.839</b> |
| GD | GGGGAC  | 3126.50 | 4967 | 1.589 | <b>0.463</b>  |
| GD | GGTGAT  | 1835.49 | 2621 | 1.428 | <b>0.356</b>  |
| GD | GGTGAC  | 2073.40 | 2960 | 1.428 | <b>0.356</b>  |
| GD | GGAGAT  | 2835.09 | 3829 | 1.351 | <b>0.301</b>  |
| GD | GGAGAC  | 3202.56 | 4240 | 1.324 | <b>0.281</b>  |
| GD | GGGGAT  | 2767.76 | 2575 | 0.930 | <b>-0.072</b> |
| GD | GGCGAC  | 4342.22 | 1955 | 0.450 | <b>-0.798</b> |
| GD | GGCGAT  | 3843.98 | 880  | 0.229 | <b>-1.474</b> |
| GE | GGAGAA  | 3433.99 | 5903 | 1.719 | <b>0.542</b>  |
| GE | GGGGAG  | 4483.27 | 6552 | 1.461 | <b>0.379</b>  |
| GE | GGTGAA  | 2223.23 | 3248 | 1.461 | <b>0.379</b>  |
| GE | GGAGAG  | 4592.33 | 5961 | 1.298 | <b>0.261</b>  |
| GE | GGTGAG  | 2973.17 | 2988 | 1.005 | <b>0.005</b>  |
| GE | GGGGAA  | 3352.44 | 3041 | 0.907 | <b>-0.098</b> |
| GE | GGCGAG  | 6226.56 | 3530 | 0.567 | <b>-0.568</b> |
| GE | GGCGAA  | 4656.01 | 718  | 0.154 | <b>-1.869</b> |
| GF | GGCTTC  | 3466.22 | 6121 | 1.766 | <b>0.569</b>  |
| GF | GGATTT  | 2233.54 | 2666 | 1.194 | <b>0.177</b>  |
| GF | GGTTTT  | 1446.04 | 1665 | 1.151 | <b>0.141</b>  |
| GF | GGCTTT  | 3028.37 | 3201 | 1.057 | <b>0.055</b>  |
| GF | GGTTTC  | 1655.11 | 1548 | 0.935 | <b>-0.067</b> |
| GF | GGATTC  | 2556.47 | 1534 | 0.600 | <b>-0.511</b> |
| GF | GGGTTT  | 2180.50 | 1244 | 0.571 | <b>-0.561</b> |
| GF | GGGTTC  | 2495.76 | 1083 | 0.434 | <b>-0.835</b> |
| GG | GGTGGT  | 1061.28 | 2286 | 2.154 | <b>0.767</b>  |
| GG | GGTGGC  | 2222.59 | 3657 | 1.645 | <b>0.498</b>  |
| GG | GGTGG A | 1639.25 | 2618 | 1.597 | <b>0.468</b>  |
| GG | GGAGGA  | 2531.97 | 3609 | 1.425 | <b>0.354</b>  |
| GG | GGTGGG  | 1600.32 | 2267 | 1.417 | <b>0.348</b>  |
| GG | GGGGGC  | 3351.47 | 4673 | 1.394 | <b>0.332</b>  |
| GG | GGAGGT  | 1639.25 | 2152 | 1.313 | <b>0.272</b>  |
| GG | GGAGGC  | 3433.00 | 3776 | 1.100 | <b>0.095</b>  |
| GG | GGCGGC  | 4654.67 | 4787 | 1.028 | <b>0.028</b>  |
| GG | GGGGGT  | 1600.32 | 1543 | 0.964 | <b>-0.036</b> |
| GG | GGAGGG  | 2471.84 | 2351 | 0.951 | <b>-0.050</b> |
| GG | GGGGGA  | 2471.84 | 1517 | 0.614 | <b>-0.488</b> |
| GG | GGCGGG  | 3351.47 | 2001 | 0.597 | <b>-0.516</b> |
| GG | GGGGGG  | 2413.14 | 1080 | 0.448 | <b>-0.804</b> |



|    |        |         |      |       |        |
|----|--------|---------|------|-------|--------|
| GG | GGCGGT | 2222.59 | 936  | 0.421 | -0.865 |
| GG | GGCGGA | 3433.00 | 845  | 0.246 | -1.402 |
| GH | GGCCAC | 2540.15 | 3679 | 1.448 | 0.370  |
| GH | GGTCAT | 879.57  | 1022 | 1.162 | 0.150  |
| GH | GGACAT | 1358.57 | 1438 | 1.058 | 0.057  |
| GH | GGCCAT | 1842.04 | 1679 | 0.911 | -0.093 |
| GH | GGGCAC | 1828.97 | 1629 | 0.891 | -0.116 |
| GH | GGTCAC | 1212.92 | 1008 | 0.831 | -0.185 |
| GH | GGACAC | 1873.46 | 1479 | 0.789 | -0.236 |
| GH | GGGCAT | 1326.31 | 928  | 0.700 | -0.357 |
| GI | GGCATC | 3372.48 | 5474 | 1.623 | 0.484  |
| GI | GGAATA | 904.63  | 1338 | 1.479 | 0.391  |
| GI | GGAATT | 1966.96 | 2560 | 1.302 | 0.264  |
| GI | GGCATT | 2666.92 | 2670 | 1.001 | 0.001  |
| GI | GGTATT | 1273.45 | 1052 | 0.826 | -0.191 |
| GI | GGGATC | 2428.27 | 1958 | 0.806 | -0.215 |
| GI | GGTATA | 585.67  | 461  | 0.787 | -0.239 |
| GI | GGAATC | 2487.34 | 1910 | 0.768 | -0.264 |
| GI | GGGATA | 883.14  | 666  | 0.754 | -0.282 |
| GI | GGGATT | 1920.24 | 1421 | 0.740 | -0.301 |
| GI | GGCATA | 1226.55 | 885  | 0.722 | -0.326 |
| GI | GGTATC | 1610.35 | 931  | 0.578 | -0.548 |
| GK | GGAAAA | 3199.11 | 4553 | 1.423 | 0.353  |
| GK | GGGAAG | 4044.81 | 5674 | 1.403 | 0.338  |
| GK | GGGAAA | 3123.14 | 4119 | 1.319 | 0.277  |
| GK | GGCAAG | 5617.61 | 5712 | 1.017 | 0.017  |
| GK | GGAAAG | 4143.21 | 3706 | 0.894 | -0.112 |
| GK | GGCAAA | 4337.55 | 3581 | 0.826 | -0.192 |
| GK | GGTAAA | 2071.17 | 1334 | 0.644 | -0.440 |
| GK | GGTAAG | 2682.40 | 540  | 0.201 | -1.603 |
| GL | GGCCTC | 3017.19 | 4559 | 1.511 | 0.413  |
| GL | GGTTTA | 579.43  | 820  | 1.415 | 0.347  |
| GL | GGTTTG | 973.39  | 1294 | 1.329 | 0.285  |
| GL | GGGCTG | 4514.62 | 5878 | 1.302 | 0.264  |
| GL | GGTCTT | 993.42  | 1258 | 1.266 | 0.236  |
| GL | GGCCTG | 6270.10 | 7822 | 1.248 | 0.221  |
| GL | GGGCTC | 2172.45 | 2563 | 1.180 | 0.165  |
| GL | GGATTA | 894.98  | 991  | 1.107 | 0.102  |
| GL | GGACTT | 1534.44 | 1613 | 1.051 | 0.050  |
| GL | GGCTTG | 2038.53 | 2109 | 1.035 | 0.034  |
| GL | GGCCTT | 2080.48 | 2098 | 1.008 | 0.008  |
| GL | GGACTA | 827.51  | 799  | 0.966 | -0.035 |
| GL | GGGCTT | 1497.99 | 1445 | 0.965 | -0.036 |
| GL | GGTCTC | 1440.70 | 1365 | 0.947 | -0.054 |
| GL | GGTCTA | 535.75  | 487  | 0.909 | -0.095 |
| GL | GGGCTA | 807.86  | 726  | 0.899 | -0.107 |
| GL | GGCCTA | 1121.99 | 968  | 0.863 | -0.148 |
| GL | GGCTTA | 1213.47 | 935  | 0.771 | -0.261 |
| GL | GGACTC | 2225.29 | 1656 | 0.744 | -0.295 |
| GL | GGATTG | 1503.50 | 1062 | 0.706 | -0.348 |
| GL | GGTCTG | 2993.96 | 2034 | 0.679 | -0.387 |
| GL | GGGTTG | 1467.79 | 870  | 0.593 | -0.523 |
| GL | GGGTTA | 873.73  | 467  | 0.534 | -0.626 |



|    |        |         |      |       |               |
|----|--------|---------|------|-------|---------------|
| GL | GGACTG | 4624.44 | 2384 | 0.516 | <b>-0.663</b> |
| GM | GGCATG | 3177.11 | 3953 | 1.244 | <b>0.219</b>  |
| GM | GGAATG | 2343.24 | 2482 | 1.059 | <b>0.058</b>  |
| GM | GGGATG | 2287.59 | 2247 | 0.982 | <b>-0.018</b> |
| GM | GGTATG | 1517.06 | 643  | 0.424 | <b>-0.858</b> |
| GN | GGAAAT | 2150.19 | 3332 | 1.550 | <b>0.438</b>  |
| GN | GGGAAC | 2311.93 | 2816 | 1.218 | <b>0.197</b>  |
| GN | GGCAAC | 3210.92 | 3701 | 1.153 | <b>0.142</b>  |
| GN | GGAAAC | 2368.18 | 2679 | 1.131 | <b>0.123</b>  |
| GN | GGGAAT | 2099.13 | 1823 | 0.868 | <b>-0.141</b> |
| GN | GGCAAT | 2915.36 | 2061 | 0.707 | <b>-0.347</b> |
| GN | GGTAAT | 1392.08 | 784  | 0.563 | <b>-0.574</b> |
| GN | GGTAAC | 1533.21 | 785  | 0.512 | <b>-0.669</b> |
| GP | GGGCCC | 2634.22 | 3947 | 1.498 | <b>0.404</b>  |
| GP | GGGCCG | 954.47  | 1417 | 1.485 | <b>0.395</b>  |
| GP | GGCCCC | 3658.52 | 4576 | 1.251 | <b>0.224</b>  |
| GP | GGCCCG | 1325.61 | 1623 | 1.224 | <b>0.202</b>  |
| GP | GGTCCT | 1564.62 | 1910 | 1.221 | <b>0.199</b>  |
| GP | GGGCCT | 2359.31 | 2542 | 1.077 | <b>0.075</b>  |
| GP | GGTCCC | 1746.93 | 1827 | 1.046 | <b>0.045</b>  |
| GP | GGCCCT | 3276.71 | 2994 | 0.914 | <b>-0.090</b> |
| GP | GGGCCA | 2277.03 | 2003 | 0.880 | <b>-0.128</b> |
| GP | GGTCCA | 1510.06 | 1264 | 0.837 | <b>-0.178</b> |
| GP | GGACCC | 2698.30 | 2240 | 0.830 | <b>-0.186</b> |
| GP | GGACCA | 2332.42 | 1908 | 0.818 | <b>-0.201</b> |
| GP | GGACCT | 2416.70 | 1957 | 0.810 | <b>-0.211</b> |
| GP | GGCCCA | 3162.44 | 2548 | 0.806 | <b>-0.216</b> |
| GP | GGTCCG | 632.98  | 351  | 0.555 | <b>-0.590</b> |
| GP | GGACCG | 977.69  | 421  | 0.431 | <b>-0.843</b> |
| GQ | GGACAA | 1382.58 | 1677 | 1.213 | <b>0.193</b>  |
| GQ | GGGCAG | 3769.06 | 4425 | 1.174 | <b>0.160</b>  |
| GQ | GGCCAG | 5234.64 | 6081 | 1.162 | <b>0.150</b>  |
| GQ | GGTCAA | 895.11  | 953  | 1.065 | <b>0.063</b>  |
| GQ | GGCCAA | 1874.58 | 1593 | 0.850 | <b>-0.163</b> |
| GQ | GGGCAA | 1349.74 | 1124 | 0.833 | <b>-0.183</b> |
| GQ | GGACAG | 3860.75 | 3134 | 0.812 | <b>-0.209</b> |
| GQ | GGTCAG | 2499.53 | 1879 | 0.752 | <b>-0.285</b> |
| GR | GGCCGC | 1832.29 | 3615 | 1.973 | <b>0.680</b>  |
| GR | GGAAGA | 1490.60 | 2294 | 1.539 | <b>0.431</b>  |
| GR | GGCCGG | 2003.98 | 2892 | 1.443 | <b>0.367</b>  |
| GR | GGCCGT | 784.47  | 1022 | 1.303 | <b>0.265</b>  |
| GR | GGTCGT | 374.58  | 450  | 1.201 | <b>0.183</b>  |
| GR | GGCCGA | 1086.32 | 1252 | 1.153 | <b>0.142</b>  |
| GR | GGGCGC | 1319.29 | 1471 | 1.115 | <b>0.109</b>  |
| GR | GGTCGA | 518.71  | 546  | 1.053 | <b>0.051</b>  |
| GR | GGCAGG | 1984.13 | 2022 | 1.019 | <b>0.019</b>  |
| GR | GGGAGG | 1428.62 | 1435 | 1.004 | <b>0.004</b>  |
| GR | GGGCGG | 1442.91 | 1437 | 0.996 | <b>-0.004</b> |
| GR | GGAAGG | 1463.37 | 1370 | 0.936 | <b>-0.066</b> |
| GR | GGGAGA | 1455.20 | 1344 | 0.924 | <b>-0.079</b> |
| GR | GGACGT | 578.58  | 514  | 0.888 | <b>-0.118</b> |
| GR | GGACGA | 801.20  | 671  | 0.837 | <b>-0.177</b> |
| GR | GGGCGT | 564.84  | 471  | 0.834 | <b>-0.182</b> |

|    |         |         |      |       |        |
|----|---------|---------|------|-------|--------|
| GR | GGCAGA  | 2021.05 | 1684 | 0.833 | -0.182 |
| GR | GGGCGA  | 782.17  | 626  | 0.800 | -0.223 |
| GR | GGTCGC  | 874.92  | 596  | 0.681 | -0.384 |
| GR | GGTCGG  | 956.90  | 555  | 0.580 | -0.545 |
| GR | GGTAGA  | 965.05  | 529  | 0.548 | -0.601 |
| GR | GGACGC  | 1351.39 | 729  | 0.539 | -0.617 |
| GR | GGACGG  | 1478.01 | 737  | 0.499 | -0.696 |
| GR | GGTAGG  | 947.42  | 244  | 0.258 | -1.357 |
| GS | GGCAGC  | 3581.32 | 6542 | 1.827 | 0.603  |
| GS | GGCTCC  | 3161.05 | 5376 | 1.701 | 0.531  |
| GS | GGCTCG  | 835.91  | 1323 | 1.583 | 0.459  |
| GS | GGCAGT  | 2259.47 | 2875 | 1.272 | 0.241  |
| GS | GGAAGT  | 1666.45 | 2085 | 1.251 | 0.224  |
| GS | GGTTCT  | 1313.02 | 1563 | 1.190 | 0.174  |
| GS | GGCTCT  | 2749.80 | 3087 | 1.123 | 0.116  |
| GS | GGGAGC  | 2578.63 | 2566 | 0.995 | -0.005 |
| GS | GGTTCC  | 1509.39 | 1428 | 0.946 | -0.055 |
| GS | GGCTCA  | 2223.05 | 2101 | 0.945 | -0.056 |
| GS | GGTTCA  | 1061.50 | 981  | 0.924 | -0.079 |
| GS | GGAAGC  | 2641.36 | 2137 | 0.809 | -0.212 |
| GS | GGATCA  | 1639.59 | 1281 | 0.781 | -0.247 |
| GS | GGGAGT  | 1626.88 | 1267 | 0.779 | -0.250 |
| GS | GGATCT  | 2028.08 | 1470 | 0.725 | -0.322 |
| GS | GGGTCC  | 2276.03 | 1646 | 0.723 | -0.324 |
| GS | GGGTCT  | 1979.92 | 1280 | 0.646 | -0.436 |
| GS | GGGTCCG | 601.87  | 379  | 0.630 | -0.463 |
| GS | GGTAGT  | 1078.89 | 646  | 0.599 | -0.513 |
| GS | GGATCC  | 2331.40 | 1342 | 0.576 | -0.552 |
| GS | GGGTCA  | 1600.65 | 887  | 0.554 | -0.590 |
| GS | GGTTCG  | 399.14  | 209  | 0.524 | -0.647 |
| GS | GGATCG  | 616.51  | 276  | 0.448 | -0.804 |
| GS | GGTAGC  | 1710.07 | 723  | 0.423 | -0.861 |
| GT | GGCACC  | 3271.07 | 4870 | 1.489 | 0.398  |
| GT | GGCACG  | 1074.53 | 1368 | 1.273 | 0.241  |
| GT | GGGACC  | 2355.25 | 2817 | 1.196 | 0.179  |
| GT | GGAACA  | 1953.05 | 2290 | 1.173 | 0.159  |
| GT | GGAACT  | 1727.13 | 1900 | 1.100 | 0.095  |
| GT | GGGACG  | 773.69  | 838  | 1.083 | 0.080  |
| GT | GGGACA  | 1906.66 | 1903 | 0.998 | -0.002 |
| GT | GGCACT  | 2341.75 | 2331 | 0.995 | -0.005 |
| GT | GGCACA  | 2648.06 | 2499 | 0.944 | -0.058 |
| GT | GGGACT  | 1686.11 | 1534 | 0.910 | -0.095 |
| GT | GGAACC  | 2412.54 | 1841 | 0.763 | -0.270 |
| GT | GGTACT  | 1118.18 | 840  | 0.751 | -0.286 |
| GT | GGTACC  | 1561.93 | 994  | 0.636 | -0.452 |
| GT | GGTACA  | 1264.44 | 780  | 0.617 | -0.483 |
| GT | GGAACG  | 792.51  | 445  | 0.562 | -0.577 |
| GT | GGTACG  | 513.09  | 150  | 0.292 | -1.230 |
| GV | GGTGTT  | 816.93  | 1802 | 2.206 | 0.791  |
| GV | GGTGTC  | 1045.94 | 2070 | 1.979 | 0.683  |
| GV | GGTGTA  | 530.46  | 957  | 1.804 | 0.590  |
| GV | GGTGTG  | 2069.18 | 3207 | 1.550 | 0.438  |
| GV | GGAGTA  | 819.35  | 1225 | 1.495 | 0.402  |

|    |        |         |      |       |               |
|----|--------|---------|------|-------|---------------|
| GV | GGAGTT | 1261.83 | 1841 | 1.459 | <b>0.378</b>  |
| GV | GGGGTC | 1577.18 | 2150 | 1.363 | <b>0.310</b>  |
| GV | GGAGTC | 1615.55 | 1839 | 1.138 | <b>0.130</b>  |
| GV | GGGGTT | 1231.86 | 1123 | 0.912 | <b>-0.093</b> |
| GV | GGGGTG | 3120.14 | 2770 | 0.888 | <b>-0.119</b> |
| GV | GGAGTG | 3196.04 | 2641 | 0.826 | <b>-0.191</b> |
| GV | GGGGTA | 799.89  | 631  | 0.789 | <b>-0.237</b> |
| GV | GGCGTC | 2190.46 | 1653 | 0.755 | <b>-0.282</b> |
| GV | GGCGTG | 4333.39 | 2790 | 0.644 | <b>-0.440</b> |
| GV | GGCGTT | 1710.87 | 499  | 0.292 | <b>-1.232</b> |
| GV | GGCGTA | 1110.93 | 232  | 0.209 | <b>-1.566</b> |
| GW | GGCTGG | 2102.85 | 3748 | 1.782 | <b>0.578</b>  |
| GW | GGTTGG | 1004.11 | 690  | 0.687 | <b>-0.375</b> |
| GW | GGATGG | 1550.94 | 1012 | 0.653 | <b>-0.427</b> |
| GW | GGGTGG | 1514.10 | 722  | 0.477 | <b>-0.741</b> |
| GY | GGCTAC | 2577.81 | 4581 | 1.777 | <b>0.575</b>  |
| GY | GGTTAT | 1000.20 | 1309 | 1.309 | <b>0.269</b>  |
| GY | GGCTAT | 2094.66 | 2528 | 1.207 | <b>0.188</b>  |
| GY | GGATAT | 1544.90 | 1478 | 0.957 | <b>-0.044</b> |
| GY | GGTTAC | 1230.90 | 1074 | 0.873 | <b>-0.136</b> |
| GY | GGATAC | 1901.24 | 1052 | 0.553 | <b>-0.592</b> |
| GY | GGGTAC | 1856.09 | 982  | 0.529 | <b>-0.637</b> |
| GY | GGGTAT | 1508.21 | 710  | 0.471 | <b>-0.753</b> |
| HA | CATGCT | 1101.90 | 1959 | 1.778 | <b>0.575</b>  |
| HA | CATGCA | 964.61  | 1670 | 1.731 | <b>0.549</b>  |
| HA | CATGCC | 1675.52 | 2408 | 1.437 | <b>0.363</b>  |
| HA | CACGCG | 624.72  | 681  | 1.090 | <b>0.086</b>  |
| HA | CATGCG | 453.03  | 447  | 0.987 | <b>-0.013</b> |
| HA | CACGCC | 2310.52 | 1649 | 0.714 | <b>-0.337</b> |
| HA | CACGCA | 1330.18 | 617  | 0.464 | <b>-0.768</b> |
| HA | CACGCT | 1519.52 | 549  | 0.361 | <b>-1.018</b> |
| HC | CACTGC | 1778.65 | 2629 | 1.478 | <b>0.391</b>  |
| HC | CACTGT | 1498.13 | 1717 | 1.146 | <b>0.136</b>  |
| HC | CATTGT | 1086.40 | 673  | 0.619 | <b>-0.479</b> |
| HC | CATTGC | 1289.82 | 634  | 0.492 | <b>-0.710</b> |
| HD | CATGAT | 1329.76 | 2349 | 1.766 | <b>0.569</b>  |
| HD | CATGAC | 1502.11 | 2329 | 1.550 | <b>0.439</b>  |
| HD | CACGAC | 2071.40 | 1343 | 0.648 | <b>-0.433</b> |
| HD | CACGAT | 1833.73 | 716  | 0.390 | <b>-0.940</b> |
| HE | CATGAA | 1769.46 | 3512 | 1.985 | <b>0.686</b>  |
| HE | CATGAG | 2366.33 | 3307 | 1.398 | <b>0.335</b>  |
| HE | CACGAG | 3263.15 | 2230 | 0.683 | <b>-0.381</b> |
| HE | CACGAA | 2440.07 | 790  | 0.324 | <b>-1.128</b> |
| HF | CACTTC | 2538.66 | 3116 | 1.227 | <b>0.205</b>  |
| HF | CATTTT | 1608.41 | 1806 | 1.123 | <b>0.116</b>  |
| HF | CACTTT | 2217.98 | 1884 | 0.849 | <b>-0.163</b> |
| HF | CATTTT | 1840.95 | 1400 | 0.760 | <b>-0.274</b> |
| HG | CATGGA | 1246.72 | 2238 | 1.795 | <b>0.585</b>  |
| HG | CATGGT | 807.15  | 1426 | 1.767 | <b>0.569</b>  |
| HG | CATGGG | 1217.11 | 1849 | 1.519 | <b>0.418</b>  |
| HG | CATGGC | 1690.37 | 2320 | 1.372 | <b>0.317</b>  |
| HG | CACGGC | 2331.01 | 1680 | 0.721 | <b>-0.328</b> |
| HG | CACGGG | 1678.38 | 1184 | 0.705 | <b>-0.349</b> |

|    |         |         |      |       |        |
|----|---------|---------|------|-------|--------|
| HG | CACGGT  | 1113.05 | 468  | 0.420 | -0.866 |
| HG | CACGGA  | 1719.21 | 638  | 0.371 | -0.991 |
| HH | CACCAC  | 2269.33 | 2795 | 1.232 | 0.208  |
| HH | CATCAT  | 1193.37 | 1250 | 1.047 | 0.046  |
| HH | CACCAT  | 1645.65 | 1453 | 0.883 | -0.125 |
| HH | CATCAC  | 1645.65 | 1256 | 0.763 | -0.270 |
| HI | CACATC  | 2433.52 | 3538 | 1.454 | 0.374  |
| HI | CACATT  | 1924.40 | 1924 | 1.000 | 0.000  |
| HI | CACATA  | 885.05  | 867  | 0.980 | -0.021 |
| HI | CATATT  | 1395.51 | 1260 | 0.903 | -0.102 |
| HI | CATATA  | 641.81  | 552  | 0.860 | -0.151 |
| HI | CATATC  | 1764.71 | 904  | 0.512 | -0.669 |
| HK | CACAAG  | 3102.81 | 3928 | 1.266 | 0.236  |
| HK | CACAAA  | 2395.79 | 2432 | 1.015 | 0.015  |
| HK | CATAAA  | 1737.35 | 1690 | 0.973 | -0.028 |
| HK | CATAAG  | 2250.06 | 1436 | 0.638 | -0.449 |
| HL | CATTTA  | 707.71  | 1053 | 1.488 | 0.397  |
| HL | CATTTG  | 1188.90 | 1485 | 1.249 | 0.222  |
| HL | CACCTG  | 5042.69 | 6030 | 1.196 | 0.179  |
| HL | CACCTC  | 2426.56 | 2850 | 1.175 | 0.161  |
| HL | CATCTT  | 1213.36 | 1409 | 1.161 | 0.149  |
| HL | CACTTG  | 1639.48 | 1700 | 1.037 | 0.036  |
| HL | CATCTA  | 654.36  | 649  | 0.992 | -0.008 |
| HL | CACCTT  | 1673.21 | 1499 | 0.896 | -0.110 |
| HL | CACCTA  | 902.35  | 761  | 0.843 | -0.170 |
| HL | CATCTC  | 1759.66 | 1422 | 0.808 | -0.213 |
| HL | CACTTA  | 975.93  | 781  | 0.800 | -0.223 |
| HL | CATCTG  | 3656.80 | 2202 | 0.602 | -0.507 |
| HM | CACATG  | 2348.18 | 3023 | 1.287 | 0.253  |
| HM | CATATG  | 1702.82 | 1028 | 0.604 | -0.505 |
| HN | CACAAC  | 2031.88 | 2762 | 1.359 | 0.307  |
| HN | CACAAT  | 1844.85 | 1832 | 0.993 | -0.007 |
| HN | CATAAT  | 1337.83 | 1225 | 0.916 | -0.088 |
| HN | CATAAC  | 1473.45 | 869  | 0.590 | -0.528 |
| HP | CACCCG  | 846.94  | 1341 | 1.583 | 0.460  |
| HP | CATCCT  | 1518.15 | 1770 | 1.166 | 0.153  |
| HP | CACCCC  | 2337.46 | 2530 | 1.082 | 0.079  |
| HP | CATCCA  | 1465.21 | 1577 | 1.076 | 0.074  |
| HP | CACCCA  | 2020.51 | 1919 | 0.950 | -0.052 |
| HP | CACCCCT | 2093.51 | 1859 | 0.888 | -0.119 |
| HP | CATCCC  | 1695.05 | 1265 | 0.746 | -0.293 |
| HP | CATCCG  | 614.18  | 330  | 0.537 | -0.621 |
| HQ | CATCAA  | 1143.96 | 1358 | 1.187 | 0.172  |
| HQ | CACCAG  | 4405.09 | 4761 | 1.081 | 0.078  |
| HQ | CATCAG  | 3194.43 | 2957 | 0.926 | -0.077 |
| HQ | CACCAA  | 1577.51 | 1245 | 0.789 | -0.237 |
| HR | CACAGG  | 1447.19 | 1936 | 1.338 | 0.291  |
| HR | CACCGC  | 1336.44 | 1772 | 1.326 | 0.282  |
| HR | CACAGA  | 1474.12 | 1788 | 1.213 | 0.193  |
| HR | CACCGG  | 1461.67 | 1772 | 1.212 | 0.193  |
| HR | CACCGT  | 572.18  | 667  | 1.166 | 0.153  |
| HR | CATCGA  | 574.58  | 627  | 1.091 | 0.087  |
| HR | CATCGT  | 414.93  | 452  | 1.089 | 0.086  |

|    |         |         |      |       |               |
|----|---------|---------|------|-------|---------------|
| HR | CACCGA  | 792.34  | 855  | 1.079 | <b>0.076</b>  |
| HR | CATCGG  | 1059.96 | 729  | 0.688 | <b>-0.374</b> |
| HR | CATAGA  | 1068.98 | 635  | 0.594 | <b>-0.521</b> |
| HR | CATCGC  | 969.15  | 565  | 0.583 | <b>-0.540</b> |
| HR | CATAGG  | 1049.46 | 423  | 0.403 | <b>-0.909</b> |
| HS | CACTCG  | 551.81  | 880  | 1.595 | <b>0.467</b>  |
| HS | CACAGC  | 2364.16 | 3726 | 1.576 | <b>0.455</b>  |
| HS | CACAGT  | 1491.56 | 1957 | 1.312 | <b>0.272</b>  |
| HS | CATTCA  | 1064.20 | 1307 | 1.228 | <b>0.206</b>  |
| HS | CATTCT  | 1316.36 | 1517 | 1.152 | <b>0.142</b>  |
| HS | CACTCC  | 2086.72 | 1964 | 0.941 | <b>-0.061</b> |
| HS | CACTCA  | 1467.52 | 1318 | 0.898 | <b>-0.107</b> |
| HS | CATTCC  | 1513.23 | 1219 | 0.806 | <b>-0.216</b> |
| HS | CACTCT  | 1815.24 | 1231 | 0.678 | <b>-0.388</b> |
| HS | CATAGT  | 1081.63 | 710  | 0.656 | <b>-0.421</b> |
| HS | CATTCCG | 400.16  | 256  | 0.640 | <b>-0.447</b> |
| HS | CATAGC  | 1714.41 | 782  | 0.456 | <b>-0.785</b> |
| HT | CACACG  | 778.62  | 1526 | 1.960 | <b>0.673</b>  |
| HT | CACACT  | 1696.86 | 2036 | 1.200 | <b>0.182</b>  |
| HT | CACACA  | 1918.82 | 2255 | 1.175 | <b>0.161</b>  |
| HT | CACACC  | 2370.26 | 2537 | 1.070 | <b>0.068</b>  |
| HT | CATACT  | 1230.51 | 1306 | 1.061 | <b>0.060</b>  |
| HT | CATACA  | 1391.46 | 979  | 0.704 | <b>-0.352</b> |
| HT | CATACC  | 1718.84 | 806  | 0.469 | <b>-0.757</b> |
| HT | CATACG  | 564.63  | 225  | 0.398 | <b>-0.920</b> |
| HV | CATGTT  | 869.32  | 1563 | 1.798 | <b>0.587</b>  |
| HV | CATGTA  | 564.48  | 880  | 1.559 | <b>0.444</b>  |
| HV | CATGTC  | 1113.00 | 1607 | 1.444 | <b>0.367</b>  |
| HV | CATGTG  | 2201.86 | 2797 | 1.270 | <b>0.239</b>  |
| HV | CACGTG  | 3036.34 | 2579 | 0.849 | <b>-0.163</b> |
| HV | CACGTC  | 1534.82 | 1158 | 0.754 | <b>-0.282</b> |
| HV | CACGTT  | 1198.78 | 434  | 0.362 | <b>-1.016</b> |
| HV | CACGTA  | 778.41  | 279  | 0.358 | <b>-1.026</b> |
| HW | CACTGG  | 1602.74 | 2197 | 1.371 | <b>0.315</b>  |
| HW | CATTGG  | 1162.26 | 568  | 0.489 | <b>-0.716</b> |
| HY | CACTAC  | 1943.40 | 2385 | 1.227 | <b>0.205</b>  |
| HY | CATTAT  | 1145.15 | 1240 | 1.083 | <b>0.080</b>  |
| HY | CACTAT  | 1579.16 | 1378 | 0.873 | <b>-0.136</b> |
| HY | CATTAC  | 1409.29 | 1074 | 0.762 | <b>-0.272</b> |
| IA | ATTGCT  | 1886.56 | 3678 | 1.950 | <b>0.668</b>  |
| IA | ATAGCA  | 759.54  | 1446 | 1.904 | <b>0.644</b>  |
| IA | ATTGCA  | 1651.49 | 2818 | 1.706 | <b>0.534</b>  |
| IA | ATAGCT  | 867.65  | 1289 | 1.486 | <b>0.396</b>  |
| IA | ATTGCC  | 2868.63 | 3435 | 1.197 | <b>0.180</b>  |
| IA | ATAGCC  | 1319.32 | 1191 | 0.903 | <b>-0.102</b> |
| IA | ATCGCG  | 980.82  | 708  | 0.722 | <b>-0.326</b> |
| IA | ATCGCC  | 3627.56 | 2570 | 0.708 | <b>-0.345</b> |
| IA | ATTGCG  | 775.62  | 494  | 0.637 | <b>-0.451</b> |
| IA | ATAGCG  | 356.72  | 198  | 0.555 | <b>-0.589</b> |
| IA | ATCGCA  | 2088.41 | 831  | 0.398 | <b>-0.922</b> |
| IA | ATCGCT  | 2385.67 | 910  | 0.381 | <b>-0.964</b> |
| IC | ATCTGC  | 2115.05 | 3055 | 1.444 | <b>0.368</b>  |
| IC | ATCTGT  | 1781.48 | 2074 | 1.164 | <b>0.152</b>  |

|    |        |         |      |       |               |
|----|--------|---------|------|-------|---------------|
| IC | ATATGT | 647.91  | 731  | 1.128 | <b>0.121</b>  |
| IC | ATTTGT | 1408.77 | 1197 | 0.850 | <b>-0.163</b> |
| IC | ATATGC | 769.23  | 470  | 0.611 | <b>-0.493</b> |
| IC | ATTTGC | 1672.56 | 868  | 0.519 | <b>-0.656</b> |
| ID | ATTGAT | 2604.76 | 4341 | 1.667 | <b>0.511</b>  |
| ID | ATAGAT | 1197.96 | 1947 | 1.625 | <b>0.486</b>  |
| ID | ATTGAC | 2942.37 | 3938 | 1.338 | <b>0.291</b>  |
| ID | ATAGAC | 1353.23 | 1476 | 1.091 | <b>0.087</b>  |
| ID | ATCGAC | 3720.81 | 2270 | 0.610 | <b>-0.494</b> |
| ID | ATCGAT | 3293.87 | 1141 | 0.346 | <b>-1.060</b> |
| IE | ATAGAA | 1371.51 | 2939 | 2.143 | <b>0.762</b>  |
| IE | ATTGAA | 2982.12 | 5518 | 1.850 | <b>0.615</b>  |
| IE | ATTGAG | 3988.04 | 4634 | 1.162 | <b>0.150</b>  |
| IE | ATAGAG | 1834.15 | 1898 | 1.035 | <b>0.034</b>  |
| IE | ATCGAG | 5043.12 | 3007 | 0.596 | <b>-0.517</b> |
| IE | ATCGAA | 3771.07 | 994  | 0.264 | <b>-1.333</b> |
| IF | ATATTT | 1144.73 | 1929 | 1.685 | <b>0.522</b>  |
| IF | ATCTTC | 3602.60 | 4836 | 1.342 | <b>0.294</b>  |
| IF | ATTTTT | 2489.02 | 2226 | 0.894 | <b>-0.112</b> |
| IF | ATCTTT | 3147.52 | 2779 | 0.883 | <b>-0.125</b> |
| IF | ATATTC | 1310.24 | 886  | 0.676 | <b>-0.391</b> |
| IF | ATTTTC | 2848.89 | 1887 | 0.662 | <b>-0.412</b> |
| IG | ATTGGT | 1013.16 | 2102 | 2.075 | <b>0.730</b>  |
| IG | ATTGGA | 1564.91 | 3151 | 2.014 | <b>0.700</b>  |
| IG | ATAGGA | 719.72  | 1054 | 1.464 | <b>0.381</b>  |
| IG | ATTGGG | 1527.75 | 2144 | 1.403 | <b>0.339</b>  |
| IG | ATAGGT | 465.96  | 596  | 1.279 | <b>0.246</b>  |
| IG | ATTGGC | 2121.81 | 2706 | 1.275 | <b>0.243</b>  |
| IG | ATAGGG | 702.63  | 549  | 0.781 | <b>-0.247</b> |
| IG | ATAGGC | 975.84  | 700  | 0.717 | <b>-0.332</b> |
| IG | ATCGGG | 1931.93 | 1244 | 0.644 | <b>-0.440</b> |
| IG | ATCGGC | 2683.15 | 1619 | 0.603 | <b>-0.505</b> |
| IG | ATCGGT | 1281.20 | 498  | 0.389 | <b>-0.945</b> |
| IG | ATCGGA | 1978.93 | 604  | 0.305 | <b>-1.187</b> |
| IH | ATTCAT | 1622.93 | 2242 | 1.381 | <b>0.323</b>  |
| IH | ATCCAC | 2830.09 | 3367 | 1.190 | <b>0.174</b>  |
| IH | ATACAT | 746.40  | 760  | 1.018 | <b>0.018</b>  |
| IH | ATCCAT | 2052.29 | 1814 | 0.884 | <b>-0.123</b> |
| IH | ATTCAC | 2238.00 | 1778 | 0.794 | <b>-0.230</b> |
| IH | ATACAC | 1029.28 | 558  | 0.542 | <b>-0.612</b> |
| II | ATCATC | 3797.03 | 5979 | 1.575 | <b>0.454</b>  |
| II | ATAATA | 502.24  | 700  | 1.394 | <b>0.332</b>  |
| II | ATAATT | 1092.04 | 1309 | 1.199 | <b>0.181</b>  |
| II | ATCATT | 3002.64 | 3321 | 1.106 | <b>0.101</b>  |
| II | ATTATT | 2374.46 | 2157 | 0.908 | <b>-0.096</b> |
| II | ATCATA | 1380.95 | 1183 | 0.857 | <b>-0.155</b> |
| II | ATTATA | 1092.04 | 921  | 0.843 | <b>-0.170</b> |
| II | ATAATC | 1380.95 | 715  | 0.518 | <b>-0.658</b> |
| II | ATTATC | 3002.64 | 1340 | 0.446 | <b>-0.807</b> |
| IK | ATAAAA | 1419.09 | 2244 | 1.581 | <b>0.458</b>  |
| IK | ATCAAG | 5053.39 | 5884 | 1.164 | <b>0.152</b>  |
| IK | ATAAAG | 1837.88 | 1943 | 1.057 | <b>0.056</b>  |
| IK | ATTAAA | 3085.58 | 3107 | 1.007 | <b>0.007</b>  |

|    |        |         |      |       |        |
|----|--------|---------|------|-------|--------|
| IK | ATCAAA | 3901.90 | 3830 | 0.982 | -0.019 |
| IK | ATTAAG | 3996.16 | 2286 | 0.572 | -0.559 |
| IL | ATTTTA | 977.08  | 1679 | 1.718 | 0.541  |
| IL | ATATTA | 449.37  | 723  | 1.609 | 0.476  |
| IL | ATTTTG | 1641.41 | 2339 | 1.425 | 0.354  |
| IL | ATTCTT | 1675.18 | 2271 | 1.356 | 0.304  |
| IL | ATCCTC | 3072.14 | 4017 | 1.308 | 0.268  |
| IL | ATCCTG | 6384.29 | 7754 | 1.215 | 0.194  |
| IL | ATTCTA | 903.41  | 1021 | 1.130 | 0.122  |
| IL | ATCTTG | 2075.66 | 2250 | 1.084 | 0.081  |
| IL | ATCCTA | 1142.42 | 1170 | 1.024 | 0.024  |
| IL | ATACTA | 415.49  | 416  | 1.001 | 0.001  |
| IL | ATCCTT | 2118.37 | 2058 | 0.972 | -0.029 |
| IL | ATATTG | 754.90  | 717  | 0.950 | -0.052 |
| IL | ATACTT | 770.44  | 726  | 0.942 | -0.059 |
| IL | ATCTTA | 1235.57 | 1077 | 0.872 | -0.137 |
| IL | ATTCTC | 2429.41 | 1918 | 0.789 | -0.236 |
| IL | ATTCTG | 5048.62 | 3005 | 0.595 | -0.519 |
| IL | ATACTC | 1117.32 | 458  | 0.410 | -0.892 |
| IL | ATACTG | 2321.92 | 934  | 0.402 | -0.911 |
| IM | ATCATG | 3206.80 | 4314 | 1.345 | 0.297  |
| IM | ATAATG | 1166.29 | 1196 | 1.025 | 0.025  |
| IM | ATTATG | 2535.90 | 1399 | 0.552 | -0.595 |
| IN | ATAAAT | 1088.42 | 1649 | 1.515 | 0.415  |
| IN | ATCAAC | 3296.07 | 4599 | 1.395 | 0.333  |
| IN | ATCAAT | 2992.68 | 2890 | 0.966 | -0.035 |
| IN | ATAAAC | 1198.76 | 1113 | 0.928 | -0.074 |
| IN | ATTAAT | 2366.58 | 1967 | 0.831 | -0.185 |
| IN | ATTAAC | 2606.49 | 1331 | 0.511 | -0.672 |
| IP | ATTCCT | 2051.78 | 2787 | 1.358 | 0.306  |
| IP | ATTCOA | 1980.23 | 2644 | 1.335 | 0.289  |
| IP | ATACCA | 910.73  | 1047 | 1.150 | 0.139  |
| IP | ATCCCC | 2896.94 | 3229 | 1.115 | 0.109  |
| IP | ATACCT | 943.64  | 995  | 1.054 | 0.053  |
| IP | ATCCCG | 1049.66 | 1073 | 1.022 | 0.022  |
| IP | ATCCCA | 2504.13 | 2366 | 0.945 | -0.057 |
| IP | ATCCCT | 2594.61 | 2451 | 0.945 | -0.057 |
| IP | ATTCOC | 2290.86 | 1775 | 0.775 | -0.255 |
| IP | ATACCC | 1053.60 | 610  | 0.579 | -0.547 |
| IP | ATTCOC | 830.06  | 386  | 0.465 | -0.766 |
| IP | ATACCC | 381.76  | 125  | 0.327 | -1.116 |
| IQ | ATACAA | 765.47  | 950  | 1.241 | 0.216  |
| IQ | ATTCAA | 1664.38 | 2045 | 1.229 | 0.206  |
| IQ | ATCCAG | 5877.26 | 6881 | 1.171 | 0.158  |
| IQ | ATTCAG | 4647.67 | 3987 | 0.858 | -0.153 |
| IQ | ATCCAA | 2104.71 | 1765 | 0.839 | -0.176 |
| IQ | ATACAG | 2137.52 | 1569 | 0.734 | -0.309 |
| IR | ATCCGC | 1552.18 | 2623 | 1.690 | 0.525  |
| IR | ATTCGA | 727.72  | 1142 | 1.569 | 0.451  |
| IR | ATCCGA | 920.25  | 1434 | 1.558 | 0.444  |
| IR | ATCCGT | 664.55  | 943  | 1.419 | 0.350  |
| IR | ATAAGA | 622.67  | 877  | 1.408 | 0.342  |
| IR | ATCCGG | 1697.63 | 2265 | 1.334 | 0.288  |



|    |        |         |      |       |               |
|----|--------|---------|------|-------|---------------|
| IR | ATTCGT | 525.51  | 677  | 1.288 | <b>0.253</b>  |
| IR | ATCAGA | 1712.09 | 1680 | 0.981 | <b>-0.019</b> |
| IR | ATCAGG | 1680.81 | 1513 | 0.900 | <b>-0.105</b> |
| IR | ATAAGG | 611.30  | 547  | 0.895 | <b>-0.111</b> |
| IR | ATACGT | 241.69  | 213  | 0.881 | <b>-0.126</b> |
| IR | ATACGA | 334.69  | 292  | 0.872 | <b>-0.136</b> |
| IR | ATTCGG | 1342.46 | 907  | 0.676 | <b>-0.392</b> |
| IR | ATTAGA | 1353.90 | 900  | 0.665 | <b>-0.408</b> |
| IR | ATTCGC | 1227.45 | 780  | 0.635 | <b>-0.453</b> |
| IR | ATACGG | 617.42  | 260  | 0.421 | <b>-0.865</b> |
| IR | ATTAGG | 1329.16 | 503  | 0.378 | <b>-0.972</b> |
| IR | ATACGC | 564.52  | 170  | 0.301 | <b>-1.200</b> |
| IS | ATCTCC | 2689.59 | 3743 | 1.392 | <b>0.330</b>  |
| IS | ATATCA | 687.92  | 954  | 1.387 | <b>0.327</b>  |
| IS | ATCAGC | 3047.17 | 3998 | 1.312 | <b>0.272</b>  |
| IS | ATTTCT | 1850.19 | 2423 | 1.310 | <b>0.270</b>  |
| IS | ATTTCA | 1495.77 | 1957 | 1.308 | <b>0.269</b>  |
| IS | ATCAGT | 1922.48 | 2287 | 1.190 | <b>0.174</b>  |
| IS | ATATCT | 850.92  | 1012 | 1.189 | <b>0.173</b>  |
| IS | ATCTCG | 711.23  | 773  | 1.087 | <b>0.083</b>  |
| IS | ATAAGT | 699.19  | 695  | 0.994 | <b>-0.006</b> |
| IS | ATCTCT | 2339.68 | 2317 | 0.990 | <b>-0.010</b> |
| IS | ATCTCA | 1891.49 | 1767 | 0.934 | <b>-0.068</b> |
| IS | ATTTCC | 2126.89 | 1795 | 0.844 | <b>-0.170</b> |
| IS | ATATCC | 978.18  | 703  | 0.719 | <b>-0.330</b> |
| IS | ATTAGT | 1520.28 | 906  | 0.596 | <b>-0.518</b> |
| IS | ATAAGC | 1108.24 | 636  | 0.574 | <b>-0.555</b> |
| IS | ATATCG | 258.67  | 132  | 0.510 | <b>-0.673</b> |
| IS | ATTTCG | 562.43  | 255  | 0.453 | <b>-0.791</b> |
| IS | ATTAGC | 2409.67 | 797  | 0.331 | <b>-1.106</b> |
| IT | ATCACC | 3094.94 | 4722 | 1.526 | <b>0.422</b>  |
| IT | ATCACG | 1016.68 | 1306 | 1.285 | <b>0.250</b>  |
| IT | ATAACT | 805.82  | 1009 | 1.252 | <b>0.225</b>  |
| IT | ATCACT | 2215.66 | 2751 | 1.242 | <b>0.216</b>  |
| IT | ATCACA | 2505.48 | 2989 | 1.193 | <b>0.176</b>  |
| IT | ATAACA | 911.22  | 1079 | 1.184 | <b>0.169</b>  |
| IT | ATTACT | 1752.12 | 1369 | 0.781 | <b>-0.247</b> |
| IT | ATTACA | 1981.30 | 1531 | 0.773 | <b>-0.258</b> |
| IT | ATAACC | 1125.61 | 741  | 0.658 | <b>-0.418</b> |
| IT | ATAACG | 369.76  | 204  | 0.552 | <b>-0.595</b> |
| IT | ATTACC | 2447.44 | 1083 | 0.443 | <b>-0.815</b> |
| IT | ATTACG | 803.98  | 246  | 0.306 | <b>-1.184</b> |
| IV | ATTGTT | 1261.28 | 2414 | 1.914 | <b>0.649</b>  |
| IV | ATTGTA | 819.00  | 1478 | 1.805 | <b>0.590</b>  |
| IV | ATAGTA | 376.67  | 645  | 1.712 | <b>0.538</b>  |
| IV | ATAGTT | 580.08  | 877  | 1.512 | <b>0.413</b>  |
| IV | ATTGTC | 1614.84 | 2315 | 1.434 | <b>0.360</b>  |
| IV | ATTGTG | 3194.65 | 3762 | 1.178 | <b>0.163</b>  |
| IV | ATCGTC | 2042.07 | 1679 | 0.822 | <b>-0.196</b> |
| IV | ATAGTG | 1469.26 | 1196 | 0.814 | <b>-0.206</b> |
| IV | ATAGTC | 742.69  | 575  | 0.774 | <b>-0.256</b> |
| IV | ATCGTG | 4039.83 | 2922 | 0.723 | <b>-0.324</b> |
| IV | ATCGTA | 1035.67 | 361  | 0.349 | <b>-1.054</b> |



|    |        |          |       |       |               |
|----|--------|----------|-------|-------|---------------|
| IV | ATCGTT | 1594.97  | 547   | 0.343 | <b>-1.070</b> |
| IW | ATCTGG | 1887.23  | 2427  | 1.286 | <b>0.252</b>  |
| IW | ATATGG | 686.37   | 622   | 0.906 | <b>-0.098</b> |
| IW | ATTTGG | 1492.40  | 1017  | 0.681 | <b>-0.384</b> |
| IY | ATCTAC | 2708.47  | 3486  | 1.287 | <b>0.252</b>  |
| IY | ATATAT | 800.43   | 953   | 1.191 | <b>0.174</b>  |
| IY | ATTTAT | 1740.39  | 1984  | 1.140 | <b>0.131</b>  |
| IY | ATCTAT | 2200.83  | 2196  | 0.998 | <b>-0.002</b> |
| IY | ATTTAC | 2141.83  | 1403  | 0.655 | <b>-0.423</b> |
| IY | ATATAC | 985.05   | 555   | 0.563 | <b>-0.574</b> |
| KA | AAAGCA | 3029.93  | 4322  | 1.426 | <b>0.355</b>  |
| KA | AAAGCT | 3461.21  | 4262  | 1.231 | <b>0.208</b>  |
| KA | AAGGCC | 6816.15  | 6676  | 0.979 | <b>-0.021</b> |
| KA | AAGGCG | 1842.96  | 1790  | 0.971 | <b>-0.029</b> |
| KA | AAGGCA | 3924.10  | 3654  | 0.931 | <b>-0.071</b> |
| KA | AAAGCC | 5262.99  | 4742  | 0.901 | <b>-0.104</b> |
| KA | AAGGCT | 4482.65  | 4032  | 0.899 | <b>-0.106</b> |
| KA | AAAGCG | 1423.01  | 765   | 0.538 | <b>-0.621</b> |
| KC | AAATGT | 1815.55  | 2671  | 1.471 | <b>0.386</b>  |
| KC | AAGTGT | 2351.33  | 2267  | 0.964 | <b>-0.037</b> |
| KC | AAGTGC | 2791.62  | 2498  | 0.895 | <b>-0.111</b> |
| KC | AAATGC | 2155.50  | 1678  | 0.778 | <b>-0.250</b> |
| KD | AAAGAT | 4684.00  | 6115  | 1.306 | <b>0.267</b>  |
| KD | AAGGAC | 6852.58  | 6836  | 0.998 | <b>-0.002</b> |
| KD | AAGGAT | 6066.30  | 5379  | 0.887 | <b>-0.120</b> |
| KD | AAAGAC | 5291.12  | 4564  | 0.863 | <b>-0.148</b> |
| KE | AAAGAA | 6989.41  | 9895  | 1.416 | <b>0.348</b>  |
| KE | AAGGAG | 12105.47 | 12287 | 1.015 | <b>0.015</b>  |
| KE | AAGGAA | 9052.06  | 8366  | 0.924 | <b>-0.079</b> |
| KE | AAAGAG | 9347.06  | 6946  | 0.743 | <b>-0.297</b> |
| KF | AAATTT | 2631.62  | 3140  | 1.193 | <b>0.177</b>  |
| KF | AAGTTT | 3408.25  | 3638  | 1.067 | <b>0.065</b>  |
| KF | AAGTTC | 3901.02  | 3950  | 1.013 | <b>0.012</b>  |
| KF | AAATTC | 3012.11  | 2225  | 0.739 | <b>-0.303</b> |
| KG | AAAGGA | 2672.15  | 4509  | 1.687 | <b>0.523</b>  |
| KG | AAAGGT | 1730.00  | 2402  | 1.388 | <b>0.328</b>  |
| KG | AAAGGC | 3623.06  | 3435  | 0.948 | <b>-0.053</b> |
| KG | AAAGGG | 2608.69  | 2465  | 0.945 | <b>-0.057</b> |
| KG | AAGGGC | 4692.27  | 4309  | 0.918 | <b>-0.085</b> |
| KG | AAGGGT | 2240.55  | 1978  | 0.883 | <b>-0.125</b> |
| KG | AAGGGG | 3378.54  | 2740  | 0.811 | <b>-0.209</b> |
| KG | AAGGGA | 3460.73  | 2568  | 0.742 | <b>-0.298</b> |
| KH | AAACAT | 1929.29  | 2356  | 1.221 | <b>0.200</b>  |
| KH | AAGCAC | 3445.60  | 3583  | 1.040 | <b>0.039</b>  |
| KH | AAGCAT | 2498.64  | 2430  | 0.973 | <b>-0.028</b> |
| KH | AAACAC | 2660.47  | 2165  | 0.814 | <b>-0.206</b> |
| KI | AAAATA | 1547.96  | 2667  | 1.723 | <b>0.544</b>  |
| KI | AAAATT | 3365.76  | 3894  | 1.157 | <b>0.146</b>  |
| KI | AAGATC | 5512.26  | 5523  | 1.002 | <b>0.002</b>  |
| KI | AAGATA | 2004.77  | 1943  | 0.969 | <b>-0.031</b> |
| KI | AAGATT | 4359.03  | 3732  | 0.856 | <b>-0.155</b> |
| KI | AAAATC | 4256.21  | 3287  | 0.772 | <b>-0.258</b> |
| KK | AAGAAG | 11070.03 | 13815 | 1.248 | <b>0.222</b>  |

|    |        |         |       |       |        |
|----|--------|---------|-------|-------|--------|
| KK | AAGAAA | 8547.55 | 10129 | 1.185 | 0.170  |
| KK | AAAAAG | 8547.55 | 6145  | 0.719 | -0.330 |
| KK | AAAAAA | 6599.86 | 4676  | 0.708 | -0.345 |
| KL | AAATTA | 1273.72 | 2084  | 1.636 | 0.492  |
| KL | AAACTA | 1177.70 | 1750  | 1.486 | 0.396  |
| KL | AAACTT | 2183.78 | 3014  | 1.380 | 0.322  |
| KL | AAGCTG | 8523.68 | 9600  | 1.126 | 0.119  |
| KL | AAGCTA | 1525.25 | 1660  | 1.088 | 0.085  |
| KL | AAGCTC | 4101.62 | 4076  | 0.994 | -0.006 |
| KL | AAATTG | 2139.75 | 2113  | 0.987 | -0.013 |
| KL | AAGCTT | 2828.24 | 2772  | 0.980 | -0.020 |
| KL | AAGTTA | 1649.61 | 1459  | 0.884 | -0.123 |
| KL | AAACTC | 3167.00 | 2653  | 0.838 | -0.177 |
| KL | AAGTTG | 2771.21 | 2280  | 0.823 | -0.195 |
| KL | AAACTG | 6581.43 | 4462  | 0.678 | -0.389 |
| KM | AAGATG | 5479.27 | 5650  | 1.031 | 0.031  |
| KM | AAAATG | 4230.73 | 4060  | 0.960 | -0.041 |
| KN | AAAAAT | 3683.47 | 4378  | 1.189 | 0.173  |
| KN | AAGAAC | 5254.13 | 5515  | 1.050 | 0.048  |
| KN | AAGAAT | 4770.51 | 4618  | 0.968 | -0.032 |
| KN | AAAAAC | 4056.89 | 3254  | 0.802 | -0.221 |
| KP | AAACCA | 2803.51 | 3370  | 1.202 | 0.184  |
| KP | AAGCCC | 4200.41 | 4673  | 1.113 | 0.107  |
| KP | AAGCCA | 3630.85 | 4035  | 1.111 | 0.106  |
| KP | AAACCT | 2904.80 | 3118  | 1.073 | 0.071  |
| KP | AAGCCG | 1521.96 | 1544  | 1.014 | 0.014  |
| KP | AAGCCT | 3762.04 | 3396  | 0.903 | -0.102 |
| KP | AAACCC | 3243.28 | 2624  | 0.809 | -0.212 |
| KP | AAACCG | 1175.16 | 482   | 0.410 | -0.891 |
| KQ | AAACAA | 2178.87 | 3274  | 1.503 | 0.407  |
| KQ | AAGCAA | 2821.88 | 3177  | 1.126 | 0.119  |
| KQ | AAGCAG | 7879.90 | 8081  | 1.026 | 0.025  |
| KQ | AAACAG | 6084.35 | 4433  | 0.729 | -0.317 |
| KR | AAAAGA | 2247.57 | 3147  | 1.400 | 0.337  |
| KR | AAGAGG | 2857.67 | 3975  | 1.391 | 0.330  |
| KR | AAGAGA | 2910.85 | 3511  | 1.206 | 0.187  |
| KR | AAAAGG | 2206.51 | 2325  | 1.054 | 0.052  |
| KR | AAACGT | 872.39  | 862   | 0.988 | -0.012 |
| KR | AAGCGG | 2886.27 | 2828  | 0.980 | -0.020 |
| KR | AAGCGC | 2638.99 | 2532  | 0.959 | -0.041 |
| KR | AAACGA | 1208.07 | 1087  | 0.900 | -0.106 |
| KR | AAGCGT | 1129.84 | 978   | 0.866 | -0.144 |
| KR | AAGCGA | 1564.59 | 1325  | 0.847 | -0.166 |
| KR | AAACGG | 2228.59 | 1178  | 0.529 | -0.638 |
| KR | AAACGC | 2037.65 | 1041  | 0.511 | -0.672 |
| KS | AAATCA | 1871.14 | 2533  | 1.354 | 0.303  |
| KS | AAAAGT | 1901.80 | 2389  | 1.256 | 0.228  |
| KS | AAATCT | 2314.50 | 2793  | 1.207 | 0.188  |
| KS | AAGTCA | 2423.33 | 2566  | 1.059 | 0.057  |
| KS | AAGAGC | 3903.97 | 4045  | 1.036 | 0.035  |
| KS | AAGAGT | 2463.04 | 2459  | 0.998 | -0.002 |
| KS | AAGTCG | 911.22  | 904   | 0.992 | -0.008 |
| KS | AAGTCC | 3445.84 | 3100  | 0.900 | -0.106 |

|    |        |         |       |       |        |
|----|--------|---------|-------|-------|--------|
| KS | AAGTCT | 2997.54 | 2675  | 0.892 | -0.114 |
| KS | AAATCC | 2660.65 | 2304  | 0.866 | -0.144 |
| KS | AAAAGC | 3014.39 | 2381  | 0.790 | -0.236 |
| KS | AAATCG | 703.58  | 462   | 0.657 | -0.421 |
| KT | AAAACA | 2831.74 | 3611  | 1.275 | 0.243  |
| KT | AAGACG | 1488.17 | 1790  | 1.203 | 0.185  |
| KT | AAAACT | 2504.18 | 2969  | 1.186 | 0.170  |
| KT | AAGACC | 4530.26 | 4475  | 0.988 | -0.012 |
| KT | AAGACA | 3667.42 | 3574  | 0.975 | -0.026 |
| KT | AAGACT | 3243.20 | 2876  | 0.887 | -0.120 |
| KT | AAAACC | 3497.97 | 2854  | 0.816 | -0.203 |
| KT | AAAACG | 1149.07 | 763   | 0.664 | -0.409 |
| KV | AAAGTA | 1317.00 | 2214  | 1.681 | 0.519  |
| KV | AAAGTT | 2028.22 | 3042  | 1.500 | 0.405  |
| KV | AAAGTC | 2596.78 | 2642  | 1.017 | 0.017  |
| KV | AAGGTG | 6653.25 | 6512  | 0.979 | -0.021 |
| KV | AAGGTC | 3363.11 | 3016  | 0.897 | -0.109 |
| KV | AAGGTT | 2626.77 | 2294  | 0.873 | -0.135 |
| KV | AAAGTG | 5137.21 | 4417  | 0.860 | -0.151 |
| KV | AAGGTA | 1705.66 | 1291  | 0.757 | -0.279 |
| KW | AAGTGG | 2598.56 | 2701  | 1.039 | 0.039  |
| KW | AAATGG | 2006.44 | 1904  | 0.949 | -0.052 |
| KY | AAATAT | 2319.32 | 2982  | 1.286 | 0.251  |
| KY | AAGTAC | 3696.62 | 3603  | 0.975 | -0.026 |
| KY | AAATAC | 2854.29 | 2763  | 0.968 | -0.033 |
| KY | AAGTAT | 3003.78 | 2526  | 0.841 | -0.173 |
| LA | CTGGCG | 2275.39 | 3643  | 1.601 | 0.471  |
| LA | TTGGCA | 1575.16 | 2350  | 1.492 | 0.400  |
| LA | CTGGCC | 8415.49 | 12456 | 1.480 | 0.392  |
| LA | TTGGCT | 1799.36 | 2643  | 1.469 | 0.384  |
| LA | TTAGCA | 937.64  | 1314  | 1.401 | 0.337  |
| LA | CTTGCT | 1836.39 | 2345  | 1.277 | 0.244  |
| LA | CTAGCA | 866.95  | 1107  | 1.277 | 0.244  |
| LA | CTTGCA | 1607.57 | 1861  | 1.158 | 0.146  |
| LA | TTAGCT | 1071.10 | 1239  | 1.157 | 0.146  |
| LA | CTGGCT | 5534.46 | 6333  | 1.144 | 0.135  |
| LA | CTAGCT | 990.35  | 1099  | 1.110 | 0.104  |
| LA | CTGGCA | 4844.85 | 5013  | 1.035 | 0.034  |
| LA | TTGGCC | 2736.04 | 2824  | 1.032 | 0.032  |
| LA | TTGGCG | 739.77  | 623   | 0.842 | -0.172 |
| LA | CTTGCC | 2792.34 | 2201  | 0.788 | -0.238 |
| LA | CTAGCC | 1505.89 | 1159  | 0.770 | -0.262 |
| LA | CTAGCG | 407.16  | 253   | 0.621 | -0.476 |
| LA | TTAGCC | 1628.68 | 941   | 0.578 | -0.549 |
| LA | CTTGCG | 755.00  | 346   | 0.458 | -0.780 |
| LA | TTAGCG | 440.36  | 198   | 0.450 | -0.799 |
| LA | CTCGCC | 4049.56 | 1527  | 0.377 | -0.975 |
| LA | CTCGCG | 1094.93 | 390   | 0.356 | -1.032 |
| LA | CTCGCT | 2663.20 | 605   | 0.227 | -1.482 |
| LA | CTCGCA | 2331.36 | 429   | 0.184 | -1.693 |
| LC | CTCTGC | 1769.27 | 3523  | 1.991 | 0.689  |
| LC | CTCTGT | 1490.23 | 2145  | 1.439 | 0.364  |
| LC | CTTTGT | 1027.58 | 1155  | 1.124 | 0.117  |

|    |        |          |       |       |               |
|----|--------|----------|-------|-------|---------------|
| LC | TTATGT | 599.35   | 627   | 1.046 | <b>0.045</b>  |
| LC | CTGTGC | 3676.77  | 3517  | 0.957 | <b>-0.044</b> |
| LC | TTGTGT | 1006.86  | 856   | 0.850 | <b>-0.162</b> |
| LC | CTTTGC | 1219.99  | 974   | 0.798 | <b>-0.225</b> |
| LC | CTGTGT | 3096.89  | 2370  | 0.765 | <b>-0.268</b> |
| LC | CTATGT | 554.17   | 417   | 0.752 | <b>-0.284</b> |
| LC | TTGTGC | 1195.39  | 722   | 0.604 | <b>-0.504</b> |
| LC | TTATGC | 711.58   | 368   | 0.517 | <b>-0.659</b> |
| LC | CTATGC | 657.93   | 332   | 0.505 | <b>-0.684</b> |
| LD | TTGGAT | 2174.51  | 3688  | 1.696 | <b>0.528</b>  |
| LD | TTAGAT | 1294.41  | 1977  | 1.527 | <b>0.424</b>  |
| LD | CTGGAC | 7555.23  | 10531 | 1.394 | <b>0.332</b>  |
| LD | CTAGAT | 1196.83  | 1584  | 1.323 | <b>0.280</b>  |
| LD | TTGGAC | 2456.35  | 2775  | 1.130 | <b>0.122</b>  |
| LD | CTTGAT | 2219.25  | 2463  | 1.110 | <b>0.104</b>  |
| LD | CTGGAT | 6688.33  | 6912  | 1.033 | <b>0.033</b>  |
| LD | CTAGAC | 1351.95  | 1390  | 1.028 | <b>0.028</b>  |
| LD | CTTGAC | 2506.90  | 1832  | 0.731 | <b>-0.314</b> |
| LD | TTAGAC | 1462.19  | 969   | 0.663 | <b>-0.411</b> |
| LD | CTCGAC | 3635.60  | 981   | 0.270 | <b>-1.310</b> |
| LD | CTCGAT | 3218.44  | 658   | 0.204 | <b>-1.587</b> |
| LE | TTAGAA | 1739.66  | 3085  | 1.773 | <b>0.573</b>  |
| LE | CTAGAA | 1608.51  | 2701  | 1.679 | <b>0.518</b>  |
| LE | TTGGAA | 2922.49  | 4652  | 1.592 | <b>0.465</b>  |
| LE | CTGGAG | 12021.09 | 18044 | 1.501 | <b>0.406</b>  |
| LE | TTGGAG | 3908.29  | 4774  | 1.222 | <b>0.200</b>  |
| LE | CTAGAG | 2151.09  | 2515  | 1.169 | <b>0.156</b>  |
| LE | CTTGAA | 2982.63  | 3161  | 1.060 | <b>0.058</b>  |
| LE | CTGGAA | 8988.96  | 7642  | 0.850 | <b>-0.162</b> |
| LE | TTAGAG | 2326.48  | 1873  | 0.805 | <b>-0.217</b> |
| LE | CTTGAG | 3988.72  | 2484  | 0.623 | <b>-0.474</b> |
| LE | CTCGAG | 5784.58  | 1305  | 0.226 | <b>-1.489</b> |
| LE | CTCGAA | 4325.51  | 512   | 0.118 | <b>-2.134</b> |
| LF | CTCTTC | 2629.18  | 6495  | 2.470 | <b>0.904</b>  |
| LF | TTATTT | 923.85   | 1405  | 1.521 | <b>0.419</b>  |
| LF | CTCTTT | 2297.07  | 3446  | 1.500 | <b>0.406</b>  |
| LF | CTTTTT | 1583.93  | 1937  | 1.223 | <b>0.201</b>  |
| LF | CTTTTC | 1812.93  | 1936  | 1.068 | <b>0.066</b>  |
| LF | CTATTT | 854.20   | 876   | 1.026 | <b>0.025</b>  |
| LF | TTGTTT | 1551.99  | 1544  | 0.995 | <b>-0.005</b> |
| LF | CTGTTT | 4773.59  | 2957  | 0.619 | <b>-0.479</b> |
| LF | CTGTTC | 5463.77  | 3119  | 0.571 | <b>-0.561</b> |
| LF | TTATTC | 1057.42  | 583   | 0.551 | <b>-0.595</b> |
| LF | TTGTTC | 1776.38  | 940   | 0.529 | <b>-0.636</b> |
| LF | CTATTC | 977.70   | 464   | 0.475 | <b>-0.745</b> |
| LG | CTTGGA | 1534.14  | 2667  | 1.738 | <b>0.553</b>  |
| LG | CTTGGT | 993.23   | 1579  | 1.590 | <b>0.464</b>  |
| LG | CTGGGC | 6268.87  | 9794  | 1.562 | <b>0.446</b>  |
| LG | CTAGGA | 827.35   | 1087  | 1.314 | <b>0.273</b>  |
| LG | CTTGGG | 1497.70  | 1881  | 1.256 | <b>0.228</b>  |
| LG | TTAGGA | 894.81   | 1114  | 1.245 | <b>0.219</b>  |
| LG | CTGGGG | 4513.74  | 5602  | 1.241 | <b>0.216</b>  |
| LG | TTGGGT | 973.20   | 1194  | 1.227 | <b>0.204</b>  |

|    |        |         |       |       |               |
|----|--------|---------|-------|-------|---------------|
| LG | TTGGGA | 1503.20 | 1820  | 1.211 | <b>0.191</b>  |
| LG | CTAGGT | 535.64  | 611   | 1.141 | <b>0.132</b>  |
| LG | TTAGGT | 579.32  | 611   | 1.055 | <b>0.053</b>  |
| LG | TTGGGG | 1467.50 | 1452  | 0.989 | <b>-0.011</b> |
| LG | CTGGGT | 2993.37 | 2947  | 0.985 | <b>-0.016</b> |
| LG | CTTGGC | 2080.08 | 2009  | 0.966 | <b>-0.035</b> |
| LG | CTAGGG | 807.70  | 766   | 0.948 | <b>-0.053</b> |
| LG | TTGGGC | 2038.13 | 1786  | 0.876 | <b>-0.132</b> |
| LG | CTGGGA | 4623.54 | 4034  | 0.872 | <b>-0.136</b> |
| LG | CTAGGC | 1121.77 | 940   | 0.838 | <b>-0.177</b> |
| LG | TTAGGG | 873.56  | 529   | 0.606 | <b>-0.502</b> |
| LG | CTCGGG | 2172.02 | 1076  | 0.495 | <b>-0.702</b> |
| LG | CTCGGC | 3016.60 | 1313  | 0.435 | <b>-0.832</b> |
| LG | TTAGGC | 1213.24 | 507   | 0.418 | <b>-0.873</b> |
| LG | CTCGGT | 1440.42 | 365   | 0.253 | <b>-1.373</b> |
| LG | CTCGGA | 2224.86 | 510   | 0.229 | <b>-1.473</b> |
| LH | CTTCAT | 1127.31 | 1980  | 1.756 | <b>0.563</b>  |
| LH | TTACAT | 657.52  | 935   | 1.422 | <b>0.352</b>  |
| LH | CTACAT | 607.95  | 741   | 1.219 | <b>0.198</b>  |
| LH | CTGCAC | 4685.05 | 5459  | 1.165 | <b>0.153</b>  |
| LH | CTCCAC | 2254.46 | 2204  | 0.978 | <b>-0.023</b> |
| LH | CTTCAC | 1554.55 | 1490  | 0.958 | <b>-0.042</b> |
| LH | CTCCAT | 1634.86 | 1521  | 0.930 | <b>-0.072</b> |
| LH | CTACAC | 838.36  | 777   | 0.927 | <b>-0.076</b> |
| LH | TTGCAT | 1104.58 | 1017  | 0.921 | <b>-0.083</b> |
| LH | TTGCAC | 1523.20 | 1140  | 0.748 | <b>-0.290</b> |
| LH | CTGCAT | 3397.45 | 2394  | 0.705 | <b>-0.350</b> |
| LH | TTACAC | 906.71  | 634   | 0.699 | <b>-0.358</b> |
| LI | CTCATC | 2602.42 | 6250  | 2.402 | <b>0.876</b>  |
| LI | TTAATA | 380.66  | 798   | 2.096 | <b>0.740</b>  |
| LI | TTAATT | 827.68  | 1290  | 1.559 | <b>0.444</b>  |
| LI | CTCATT | 2057.96 | 3117  | 1.515 | <b>0.415</b>  |
| LI | CTAATA | 351.96  | 516   | 1.466 | <b>0.383</b>  |
| LI | CTAATT | 765.28  | 952   | 1.244 | <b>0.218</b>  |
| LI | CTTATT | 1419.05 | 1761  | 1.241 | <b>0.216</b>  |
| LI | TTGATA | 639.48  | 791   | 1.237 | <b>0.213</b>  |
| LI | TTGATT | 1390.44 | 1468  | 1.056 | <b>0.054</b>  |
| LI | CTTATA | 652.64  | 683   | 1.047 | <b>0.045</b>  |
| LI | CTCATA | 946.48  | 919   | 0.971 | <b>-0.029</b> |
| LI | CTTATC | 1794.48 | 1189  | 0.663 | <b>-0.412</b> |
| LI | TTGATC | 1758.29 | 1135  | 0.646 | <b>-0.438</b> |
| LI | CTGATC | 5408.15 | 3356  | 0.621 | <b>-0.477</b> |
| LI | CTGATT | 4276.70 | 2639  | 0.617 | <b>-0.483</b> |
| LI | CTGATA | 1966.91 | 1193  | 0.607 | <b>-0.500</b> |
| LI | TTAATC | 1046.66 | 633   | 0.605 | <b>-0.503</b> |
| LI | CTAATC | 967.75  | 563   | 0.582 | <b>-0.542</b> |
| LK | TTAAAA | 1429.91 | 2557  | 1.788 | <b>0.581</b>  |
| LK | CTAAAA | 1322.10 | 1842  | 1.393 | <b>0.332</b>  |
| LK | TTGAAA | 2402.12 | 3193  | 1.329 | <b>0.285</b>  |
| LK | CTCAAG | 4604.55 | 6048  | 1.313 | <b>0.273</b>  |
| LK | CTAAAG | 1712.27 | 2078  | 1.214 | <b>0.194</b>  |
| LK | TTAAAG | 1851.89 | 2128  | 1.149 | <b>0.139</b>  |
| LK | CTGAAG | 9568.82 | 10212 | 1.067 | <b>0.065</b>  |

|    |        |          |       |       |               |
|----|--------|----------|-------|-------|---------------|
| LK | TTGAAG | 3111.01  | 3222  | 1.036 | <b>0.035</b>  |
| LK | CTCAAA | 3555.33  | 2768  | 0.779 | <b>-0.250</b> |
| LK | CTTAAA | 2451.55  | 1850  | 0.755 | <b>-0.282</b> |
| LK | CTGAAA | 7388.42  | 5227  | 0.707 | <b>-0.346</b> |
| LK | CTTAAG | 3175.03  | 1448  | 0.456 | <b>-0.785</b> |
| LL | TTATTA | 500.55   | 802   | 1.602 | <b>0.471</b>  |
| LL | CTTCTA | 793.49   | 1132  | 1.427 | <b>0.355</b>  |
| LL | CTTCTT | 1471.36  | 2099  | 1.427 | <b>0.355</b>  |
| LL | CTTTTA | 858.19   | 1203  | 1.402 | <b>0.338</b>  |
| LL | CTGCTG | 13364.10 | 18236 | 1.365 | <b>0.311</b>  |
| LL | CTTTTG | 1441.69  | 1945  | 1.349 | <b>0.299</b>  |
| LL | TTACTA | 462.82   | 608   | 1.314 | <b>0.273</b>  |
| LL | CTCCTC | 3094.54  | 3800  | 1.228 | <b>0.205</b>  |
| LL | CTCCTG | 6430.85  | 7786  | 1.211 | <b>0.191</b>  |
| LL | TTACTT | 858.19   | 1039  | 1.211 | <b>0.191</b>  |
| LL | TTGCTA | 777.49   | 929   | 1.195 | <b>0.178</b>  |
| LL | CTGCTC | 6430.85  | 7550  | 1.174 | <b>0.160</b>  |
| LL | CTACTA | 427.93   | 474   | 1.108 | <b>0.102</b>  |
| LL | CTTCTC | 2133.82  | 2292  | 1.074 | <b>0.072</b>  |
| LL | CTACTT | 793.49   | 839   | 1.057 | <b>0.056</b>  |
| LL | CTCTTG | 2090.79  | 2131  | 1.019 | <b>0.019</b>  |
| LL | TTGCTT | 1441.69  | 1464  | 1.015 | <b>0.015</b>  |
| LL | TTATTG | 840.89   | 818   | 0.973 | <b>-0.028</b> |
| LL | CTCCTT | 2133.82  | 2034  | 0.953 | <b>-0.048</b> |
| LL | TTGTTA | 840.89   | 771   | 0.917 | <b>-0.087</b> |
| LL | TTGTTG | 1412.62  | 1289  | 0.912 | <b>-0.092</b> |
| LL | CTCCTA | 1150.75  | 1034  | 0.899 | <b>-0.107</b> |
| LL | TTGCTG | 4344.93  | 3820  | 0.879 | <b>-0.129</b> |
| LL | CTTCTG | 4434.34  | 3837  | 0.865 | <b>-0.145</b> |
| LL | CTGCTA | 2391.41  | 1913  | 0.800 | <b>-0.223</b> |
| LL | CTCTTA | 1244.58  | 959   | 0.771 | <b>-0.261</b> |
| LL | CTATTA | 462.82   | 354   | 0.765 | <b>-0.268</b> |
| LL | CTGCTT | 4434.34  | 3148  | 0.710 | <b>-0.343</b> |
| LL | TTGCTC | 2090.79  | 1440  | 0.689 | <b>-0.373</b> |
| LL | CTACTC | 1150.75  | 792   | 0.688 | <b>-0.374</b> |
| LL | CTATTG | 777.49   | 532   | 0.684 | <b>-0.379</b> |
| LL | CTACTG | 2391.41  | 1583  | 0.662 | <b>-0.413</b> |
| LL | CTGTTG | 4344.93  | 2615  | 0.602 | <b>-0.508</b> |
| LL | TTACTC | 1244.58  | 657   | 0.528 | <b>-0.639</b> |
| LL | TTACTG | 2586.40  | 1358  | 0.525 | <b>-0.644</b> |
| LL | CTGTTA | 2586.40  | 953   | 0.368 | <b>-0.998</b> |
| LM | CTCATG | 2631.41  | 4030  | 1.531 | <b>0.426</b>  |
| LM | TTAATG | 1058.32  | 1228  | 1.160 | <b>0.149</b>  |
| LM | CTAATG | 978.53   | 1101  | 1.125 | <b>0.118</b>  |
| LM | TTGATG | 1777.88  | 1763  | 0.992 | <b>-0.008</b> |
| LM | CTGATG | 5468.39  | 4470  | 0.817 | <b>-0.202</b> |
| LM | CTTATG | 1814.47  | 1137  | 0.627 | <b>-0.467</b> |
| LN | TTAAAT | 962.36   | 1926  | 2.001 | <b>0.694</b>  |
| LN | CTCAAC | 2635.40  | 4681  | 1.776 | <b>0.574</b>  |
| LN | CTAAAT | 889.81   | 1446  | 1.625 | <b>0.486</b>  |
| LN | TTGAAT | 1616.68  | 2048  | 1.267 | <b>0.236</b>  |
| LN | CTCAAT | 2392.82  | 2652  | 1.108 | <b>0.103</b>  |
| LN | CTAAAC | 980.01   | 922   | 0.941 | <b>-0.061</b> |

|    |        |          |       |       |        |
|----|--------|----------|-------|-------|--------|
| LN | TTAAAC | 1059.92  | 965   | 0.910 | -0.094 |
| LN | CTTAAT | 1649.95  | 1441  | 0.873 | -0.135 |
| LN | TTGAAC | 1780.58  | 1541  | 0.865 | -0.145 |
| LN | CTGAAC | 5476.68  | 4308  | 0.787 | -0.240 |
| LN | CTGAAT | 4972.58  | 3413  | 0.686 | -0.376 |
| LN | CTTAAC | 1817.22  | 891   | 0.490 | -0.713 |
| LP | CTTCCT | 1728.14  | 2795  | 1.617 | 0.481  |
| LP | CTTCCA | 1667.88  | 2369  | 1.420 | 0.351  |
| LP | CTGCCC | 5815.10  | 7856  | 1.351 | 0.301  |
| LP | TTACCT | 1007.96  | 1244  | 1.234 | 0.210  |
| LP | CTGCCG | 2107.02  | 2489  | 1.181 | 0.167  |
| LP | TTACCA | 972.81   | 1140  | 1.172 | 0.159  |
| LP | CTCCCG | 1013.90  | 1184  | 1.168 | 0.155  |
| LP | TTGCCA | 1634.25  | 1897  | 1.161 | 0.149  |
| LP | CTACCT | 931.97   | 1045  | 1.121 | 0.114  |
| LP | TTGCCT | 1693.30  | 1800  | 1.063 | 0.061  |
| LP | CTTCCC | 1929.51  | 1889  | 0.979 | -0.021 |
| LP | CTACCA | 899.47   | 850   | 0.945 | -0.057 |
| LP | CTCCCA | 2418.82  | 2126  | 0.879 | -0.129 |
| LP | CTGCCT | 5208.23  | 4563  | 0.876 | -0.132 |
| LP | CTCCCT | 2506.21  | 2192  | 0.875 | -0.134 |
| LP | CTACCC | 1040.57  | 888   | 0.853 | -0.159 |
| LP | CTCCCC | 2798.25  | 2369  | 0.847 | -0.167 |
| LP | TTGCCC | 1890.60  | 1560  | 0.825 | -0.192 |
| LP | TTGCCG | 685.03   | 478   | 0.698 | -0.360 |
| LP | CTGCCA | 5026.60  | 3348  | 0.666 | -0.406 |
| LP | CTTCCG | 699.13   | 451   | 0.645 | -0.438 |
| LP | TTACCC | 1125.42  | 666   | 0.592 | -0.525 |
| LP | CTACCG | 377.04   | 211   | 0.560 | -0.580 |
| LP | TTACCG | 407.78   | 175   | 0.429 | -0.846 |
| LQ | TTACAA | 864.28   | 1290  | 1.493 | 0.401  |
| LQ | CTACAA | 799.12   | 1188  | 1.487 | 0.397  |
| LQ | CTTCAA | 1481.79  | 2098  | 1.416 | 0.348  |
| LQ | CTACAG | 2231.48  | 2674  | 1.198 | 0.181  |
| LQ | CTGCAG | 12470.36 | 14508 | 1.163 | 0.151  |
| LQ | CTTCAG | 4137.79  | 4363  | 1.054 | 0.053  |
| LQ | TTGCAA | 1451.91  | 1467  | 1.010 | 0.010  |
| LQ | CTCCAG | 6000.78  | 5430  | 0.905 | -0.100 |
| LQ | TTACAG | 2413.43  | 2107  | 0.873 | -0.136 |
| LQ | TTGCAG | 4054.36  | 3177  | 0.784 | -0.244 |
| LQ | CTCCAA | 2148.94  | 1524  | 0.709 | -0.344 |
| LQ | CTGCAA | 4465.77  | 2694  | 0.603 | -0.505 |
| LR | CTTCGA | 661.43   | 1365  | 2.064 | 0.725  |
| LR | CTTCGT | 477.64   | 784   | 1.641 | 0.496  |
| LR | CTGCGG | 3677.31  | 5467  | 1.487 | 0.397  |
| LR | TTAAGA | 717.74   | 1026  | 1.429 | 0.357  |
| LR | CTGCGC | 3362.26  | 4574  | 1.360 | 0.308  |
| LR | CTCCGA | 959.23   | 1289  | 1.344 | 0.295  |
| LR | CTCCGG | 1769.53  | 2229  | 1.260 | 0.231  |
| LR | CTAAGA | 663.63   | 821   | 1.237 | 0.213  |
| LR | CTCAGG | 1752.00  | 2047  | 1.168 | 0.156  |
| LR | CTTCGG | 1220.17  | 1415  | 1.160 | 0.148  |
| LR | CTCCGT | 692.69   | 771   | 1.113 | 0.107  |

|    |        |         |      |       |               |
|----|--------|---------|------|-------|---------------|
| LR | TTACGA | 385.79  | 427  | 1.107 | <b>0.101</b>  |
| LR | CTAAGG | 651.51  | 721  | 1.107 | <b>0.101</b>  |
| LR | CTCCGC | 1617.93 | 1790 | 1.106 | <b>0.101</b>  |
| LR | TTGAGA | 1205.75 | 1290 | 1.070 | <b>0.068</b>  |
| LR | CTACGT | 257.59  | 275  | 1.068 | <b>0.065</b>  |
| LR | CTACGA | 356.70  | 378  | 1.060 | <b>0.058</b>  |
| LR | CTGAGG | 3640.88 | 3637 | 0.999 | <b>-0.001</b> |
| LR | TTAAGG | 704.63  | 678  | 0.962 | <b>-0.039</b> |
| LR | TTACGT | 278.59  | 264  | 0.948 | <b>-0.054</b> |
| LR | CTGCGT | 1439.50 | 1363 | 0.947 | <b>-0.055</b> |
| LR | TTGAGG | 1183.72 | 1080 | 0.912 | <b>-0.092</b> |
| LR | CTACGG | 658.03  | 577  | 0.877 | <b>-0.131</b> |
| LR | CTCAGA | 1784.60 | 1469 | 0.823 | <b>-0.195</b> |
| LR | CTTCGC | 1115.63 | 819  | 0.734 | <b>-0.309</b> |
| LR | CTACGC | 601.65  | 438  | 0.728 | <b>-0.317</b> |
| LR | CTGCGA | 1993.40 | 1399 | 0.702 | <b>-0.354</b> |
| LR | TTGCGT | 468.01  | 321  | 0.686 | <b>-0.377</b> |
| LR | CTGAGA | 3708.63 | 2486 | 0.670 | <b>-0.400</b> |
| LR | TTGCGG | 1195.56 | 772  | 0.646 | <b>-0.437</b> |
| LR | TTGCGA | 648.09  | 418  | 0.645 | <b>-0.439</b> |
| LR | CTTAGA | 1230.56 | 694  | 0.564 | <b>-0.573</b> |
| LR | TTACGG | 711.68  | 383  | 0.538 | <b>-0.620</b> |
| LR | TTGCGC | 1093.14 | 542  | 0.496 | <b>-0.702</b> |
| LR | CTTAGG | 1208.08 | 503  | 0.416 | <b>-0.876</b> |
| LR | TTACGC | 650.71  | 232  | 0.357 | <b>-1.031</b> |
| LS | CTCAGC | 2740.30 | 5167 | 1.886 | <b>0.634</b>  |
| LS | CTTTCT | 1450.83 | 2502 | 1.725 | <b>0.545</b>  |
| LS | CTCTCC | 2418.72 | 4070 | 1.683 | <b>0.520</b>  |
| LS | CTCTCG | 639.61  | 1016 | 1.588 | <b>0.463</b>  |
| LS | CTCAGT | 1728.87 | 2589 | 1.498 | <b>0.404</b>  |
| LS | TTATCA | 684.12  | 963  | 1.408 | <b>0.342</b>  |
| LS | TTATCT | 846.22  | 1175 | 1.389 | <b>0.328</b>  |
| LS | CTTTCA | 1172.91 | 1626 | 1.386 | <b>0.327</b>  |
| LS | TTAAGT | 695.33  | 886  | 1.274 | <b>0.242</b>  |
| LS | CTCTCT | 2104.05 | 2553 | 1.213 | <b>0.193</b>  |
| LS | CTAAGT | 642.91  | 770  | 1.198 | <b>0.180</b>  |
| LS | CTCTCA | 1701.00 | 2003 | 1.178 | <b>0.163</b>  |
| LS | CTTTCC | 1667.81 | 1819 | 1.091 | <b>0.087</b>  |
| LS | TTGTCA | 1149.26 | 1210 | 1.053 | <b>0.052</b>  |
| LS | CTGTCC | 1329.18 | 1392 | 1.047 | <b>0.046</b>  |
| LS | TTGTCT | 1421.58 | 1461 | 1.028 | <b>0.027</b>  |
| LS | CTGAGC | 5694.68 | 5805 | 1.019 | <b>0.019</b>  |
| LS | CTGTCC | 5026.41 | 4628 | 0.921 | <b>-0.083</b> |
| LS | TTGAGT | 1168.09 | 1035 | 0.886 | <b>-0.121</b> |
| LS | TTGTCC | 1634.18 | 1334 | 0.816 | <b>-0.203</b> |
| LS | CTATCA | 632.54  | 512  | 0.809 | <b>-0.211</b> |
| LS | CTAAGC | 1019.02 | 791  | 0.776 | <b>-0.253</b> |
| LS | TTATCC | 972.78  | 727  | 0.747 | <b>-0.291</b> |
| LS | CTGAGT | 3592.81 | 2665 | 0.742 | <b>-0.299</b> |
| LS | CTTAGT | 1192.13 | 856  | 0.718 | <b>-0.331</b> |
| LS | CTATCT | 782.42  | 557  | 0.712 | <b>-0.340</b> |
| LS | CTGTCT | 4372.48 | 2950 | 0.675 | <b>-0.394</b> |
| LS | CTTTCC | 441.04  | 291  | 0.660 | <b>-0.416</b> |



|    |         |         |       |       |        |
|----|---------|---------|-------|-------|--------|
| LS | TTGTTCG | 432.14  | 278   | 0.643 | -0.441 |
| LS | CTGTCA  | 3534.89 | 2228  | 0.630 | -0.462 |
| LS | TTGAGC  | 1851.45 | 1128  | 0.609 | -0.496 |
| LS | CTATCC  | 899.44  | 541   | 0.601 | -0.508 |
| LS | TTATCG  | 257.24  | 152   | 0.591 | -0.526 |
| LS | TTAAGC  | 1102.11 | 551   | 0.500 | -0.693 |
| LS | CTATCG  | 237.85  | 102   | 0.429 | -0.847 |
| LS | CTTAGC  | 1889.55 | 793   | 0.420 | -0.868 |
| LT | CTCACC  | 2534.19 | 4959  | 1.957 | 0.671  |
| LT | CTCACG  | 832.47  | 1510  | 1.814 | 0.595  |
| LT | TTAACA  | 825.09  | 1163  | 1.410 | 0.343  |
| LT | CTCACT  | 1814.22 | 2521  | 1.390 | 0.329  |
| LT | TTAACT  | 729.65  | 969   | 1.328 | 0.284  |
| LT | CTAACT  | 674.64  | 817   | 1.211 | 0.191  |
| LT | CTAACA  | 762.89  | 898   | 1.177 | 0.163  |
| LT | CTCACA  | 2051.52 | 2374  | 1.157 | 0.146  |
| LT | CTGACG  | 1729.98 | 1795  | 1.038 | 0.037  |
| LT | TTGACT  | 1225.76 | 1259  | 1.027 | 0.027  |
| LT | TTGACA  | 1386.09 | 1401  | 1.011 | 0.011  |
| LT | CTTACT  | 1250.98 | 1259  | 1.006 | 0.006  |
| LT | CTGACC  | 5266.36 | 5160  | 0.980 | -0.020 |
| LT | CTTACA  | 1414.61 | 1109  | 0.784 | -0.243 |
| LT | CTGACT  | 3770.17 | 2808  | 0.745 | -0.295 |
| LT | TTGACC  | 1712.20 | 1235  | 0.721 | -0.327 |
| LT | CTAACC  | 942.38  | 678   | 0.719 | -0.329 |
| LT | TTGACG  | 562.45  | 399   | 0.709 | -0.343 |
| LT | CTGACA  | 4263.32 | 3003  | 0.704 | -0.350 |
| LT | CTAACG  | 309.57  | 215   | 0.695 | -0.365 |
| LT | TTAACG  | 1019.22 | 687   | 0.674 | -0.394 |
| LT | CTTACC  | 1747.43 | 1104  | 0.632 | -0.459 |
| LT | TTAACG  | 334.81  | 164   | 0.490 | -0.714 |
| LT | CTTACG  | 574.02  | 247   | 0.430 | -0.843 |
| LV | CTTGTT  | 1029.60 | 1741  | 1.691 | 0.525  |
| LV | TTAGTA  | 389.95  | 602   | 1.544 | 0.434  |
| LV | TTGGTA  | 655.07  | 980   | 1.496 | 0.403  |
| LV | CTTGTA  | 668.56  | 993   | 1.485 | 0.396  |
| LV | CTGGTG  | 7859.41 | 11424 | 1.454 | 0.374  |
| LV | CTAGTA  | 360.55  | 519   | 1.439 | 0.364  |
| LV | TTGGTT  | 1008.84 | 1427  | 1.414 | 0.347  |
| LV | CTTGTC  | 1318.22 | 1541  | 1.169 | 0.156  |
| LV | TTAGTT  | 600.53  | 690   | 1.149 | 0.139  |
| LV | CTGGTC  | 3972.81 | 4541  | 1.143 | 0.134  |
| LV | TTGGTG  | 2555.25 | 2882  | 1.128 | 0.120  |
| LV | CTAGTT  | 555.26  | 580   | 1.045 | 0.044  |
| LV | TTGGTC  | 1291.64 | 1345  | 1.041 | 0.040  |
| LV | CTTGTT  | 2607.83 | 2540  | 0.974 | -0.026 |
| LV | CTAGTG  | 1406.38 | 1272  | 0.904 | -0.100 |
| LV | CTGGTA  | 2014.87 | 1720  | 0.854 | -0.158 |
| LV | CTGGTT  | 3102.98 | 2576  | 0.830 | -0.186 |
| LV | CTAGTC  | 710.90  | 551   | 0.775 | -0.255 |
| LV | TTAGTG  | 1521.06 | 947   | 0.623 | -0.474 |
| LV | TTAGTC  | 768.87  | 416   | 0.541 | -0.614 |
| LV | CTCGTC  | 1911.73 | 1013  | 0.530 | -0.635 |

|    |        |         |      |       |               |
|----|--------|---------|------|-------|---------------|
| LV | CTCGTG | 3781.97 | 1691 | 0.447 | <b>-0.805</b> |
| LV | CTCGTT | 1493.16 | 373  | 0.250 | <b>-1.387</b> |
| LV | CTCGTA | 969.56  | 191  | 0.197 | <b>-1.625</b> |
| LW | CTCTGG | 1742.64 | 2796 | 1.604 | <b>0.473</b>  |
| LW | CTGTGG | 3621.43 | 3365 | 0.929 | <b>-0.073</b> |
| LW | CTTTGG | 1201.63 | 1018 | 0.847 | <b>-0.166</b> |
| LW | CTATGG | 648.03  | 501  | 0.773 | <b>-0.257</b> |
| LW | TTATGG | 700.87  | 535  | 0.763 | <b>-0.270</b> |
| LW | TTGTGG | 1177.40 | 877  | 0.745 | <b>-0.295</b> |
| LY | CTCTAC | 2082.09 | 4204 | 2.019 | <b>0.703</b>  |
| LY | TTATAT | 680.44  | 1022 | 1.502 | <b>0.407</b>  |
| LY | CTCTAT | 1691.85 | 2487 | 1.470 | <b>0.385</b>  |
| LY | CTTTAT | 1166.60 | 1591 | 1.364 | <b>0.310</b>  |
| LY | CTATAT | 629.14  | 596  | 0.947 | <b>-0.054</b> |
| LY | TTGTAT | 1143.08 | 1063 | 0.930 | <b>-0.073</b> |
| LY | CTGTAC | 4326.84 | 3390 | 0.783 | <b>-0.244</b> |
| LY | CTTTAC | 1435.69 | 1069 | 0.745 | <b>-0.295</b> |
| LY | TTGTAC | 1406.74 | 1006 | 0.715 | <b>-0.335</b> |
| LY | TTATAC | 837.39  | 579  | 0.691 | <b>-0.369</b> |
| LY | CTGTAT | 3515.88 | 2202 | 0.626 | <b>-0.468</b> |
| LY | CTATAC | 774.26  | 481  | 0.621 | <b>-0.476</b> |
| MA | ATGGCG | 1645.46 | 2370 | 1.440 | <b>0.365</b>  |
| MA | ATGGCA | 3503.58 | 3580 | 1.022 | <b>0.022</b>  |
| MA | ATGGCT | 4002.27 | 4003 | 1.000 | <b>0.000</b>  |
| MA | ATGGCC | 6085.70 | 5284 | 0.868 | <b>-0.141</b> |
| MC | ATGTGT | 1386.67 | 1448 | 1.044 | <b>0.043</b>  |
| MC | ATGTGC | 1646.33 | 1585 | 0.963 | <b>-0.038</b> |
| MD | ATGGAT | 4467.48 | 4634 | 1.037 | <b>0.037</b>  |
| MD | ATGGAC | 5046.52 | 4880 | 0.967 | <b>-0.034</b> |
| ME | ATGGAG | 8054.28 | 8223 | 1.021 | <b>0.021</b>  |
| ME | ATGGAA | 6022.72 | 5854 | 0.972 | <b>-0.028</b> |
| MF | ATGTTT | 2565.53 | 2833 | 1.104 | <b>0.099</b>  |
| MF | ATGTTC | 2936.47 | 2669 | 0.909 | <b>-0.096</b> |
| MG | ATGGGC | 3467.73 | 3533 | 1.019 | <b>0.019</b>  |
| MG | ATGGGT | 1655.83 | 1675 | 1.012 | <b>0.012</b>  |
| MG | ATGGGA | 2557.59 | 2526 | 0.988 | <b>-0.012</b> |
| MG | ATGGGG | 2496.85 | 2444 | 0.979 | <b>-0.021</b> |
| MH | ATGCAT | 1465.33 | 1478 | 1.009 | <b>0.009</b>  |
| MH | ATGCAC | 2020.67 | 2008 | 0.994 | <b>-0.006</b> |
| MI | ATGATT | 2305.40 | 2382 | 1.033 | <b>0.033</b>  |
| MI | ATGATA | 1060.28 | 1094 | 1.032 | <b>0.031</b>  |
| MI | ATGATC | 2915.32 | 2805 | 0.962 | <b>-0.039</b> |
| MK | ATGAAG | 6107.32 | 6423 | 1.052 | <b>0.050</b>  |
| MK | ATGAAA | 4715.68 | 4400 | 0.933 | <b>-0.069</b> |
| ML | ATGCTG | 5938.40 | 6536 | 1.101 | <b>0.096</b>  |
| ML | ATGCTA | 1062.63 | 1122 | 1.056 | <b>0.054</b>  |
| ML | ATGTTG | 1930.69 | 1922 | 0.995 | <b>-0.005</b> |
| ML | ATGTTA | 1149.28 | 1134 | 0.987 | <b>-0.013</b> |
| ML | ATGCTT | 1970.42 | 1887 | 0.958 | <b>-0.043</b> |
| ML | ATGCTC | 2857.58 | 2308 | 0.808 | <b>-0.214</b> |
| MM | ATGATG | 3925.00 | 3925 | 1.000 | <b>0.000</b>  |
| MN | ATGAAT | 3249.30 | 3301 | 1.016 | <b>0.016</b>  |
| MN | ATGAAC | 3578.70 | 3527 | 0.986 | <b>-0.015</b> |

|    |         |         |      |       |               |
|----|---------|---------|------|-------|---------------|
| MP | ATGCCC  | 2676.16 | 2752 | 1.028 | <b>0.028</b>  |
| MP | ATGCCA  | 2313.29 | 2313 | 1.000 | <b>0.000</b>  |
| MP | ATGCCT  | 2396.87 | 2372 | 0.990 | <b>-0.010</b> |
| MP | ATGCCG  | 969.67  | 919  | 0.948 | <b>-0.054</b> |
| MQ | ATGCAG  | 5141.70 | 5165 | 1.005 | <b>0.005</b>  |
| MQ | ATGCAA  | 1841.30 | 1818 | 0.987 | <b>-0.013</b> |
| MR | ATGAGG  | 1626.37 | 2127 | 1.308 | <b>0.268</b>  |
| MR | ATGAGA  | 1656.63 | 1974 | 1.192 | <b>0.175</b>  |
| MR | ATGCGG  | 1642.64 | 1513 | 0.921 | <b>-0.082</b> |
| MR | ATGCGT  | 643.02  | 531  | 0.826 | <b>-0.191</b> |
| MR | ATGCGA  | 890.44  | 684  | 0.768 | <b>-0.264</b> |
| MR | ATGCGC  | 1501.91 | 1132 | 0.754 | <b>-0.283</b> |
| MS | ATGTCC  | 666.33  | 809  | 1.214 | <b>0.194</b>  |
| MS | ATGTCT  | 2191.95 | 2338 | 1.067 | <b>0.065</b>  |
| MS | ATGTCA  | 1772.07 | 1781 | 1.005 | <b>0.005</b>  |
| MS | ATGTCC  | 2519.77 | 2493 | 0.989 | <b>-0.011</b> |
| MS | ATGAGT  | 1801.10 | 1770 | 0.983 | <b>-0.017</b> |
| MS | ATGAGC  | 2854.78 | 2615 | 0.916 | <b>-0.088</b> |
| MT | ATGACT  | 2098.83 | 2195 | 1.046 | <b>0.045</b>  |
| MT | ATGACC  | 2931.75 | 2927 | 0.998 | <b>-0.002</b> |
| MT | ATGACA  | 2373.36 | 2337 | 0.985 | <b>-0.015</b> |
| MT | ATGACG  | 963.07  | 908  | 0.943 | <b>-0.059</b> |
| MV | ATGGTG  | 4813.46 | 5122 | 1.064 | <b>0.062</b>  |
| MV | ATGGTT  | 1900.41 | 1915 | 1.008 | <b>0.008</b>  |
| MV | ATGGTA  | 1234.00 | 1191 | 0.965 | <b>-0.035</b> |
| MV | ATGGTC  | 2433.13 | 2153 | 0.885 | <b>-0.122</b> |
| MW | ATGTGG  | 1876.00 | 1876 | 1.000 | <b>0.000</b>  |
| MY | ATGTAC  | 2354.66 | 2363 | 1.004 | <b>0.004</b>  |
| MY | ATGTAT  | 1913.34 | 1905 | 0.996 | <b>-0.004</b> |
| NA | AATGCA  | 1705.68 | 3344 | 1.961 | <b>0.673</b>  |
| NA | AATGCT  | 1948.47 | 3458 | 1.775 | <b>0.574</b>  |
| NA | AATGCC  | 2962.77 | 4259 | 1.438 | <b>0.363</b>  |
| NA | AATGCG  | 801.08  | 624  | 0.779 | <b>-0.250</b> |
| NA | AACGCG  | 882.29  | 661  | 0.749 | <b>-0.289</b> |
| NA | AACGCC  | 3263.12 | 1899 | 0.582 | <b>-0.541</b> |
| NA | AACGCA  | 1878.60 | 700  | 0.373 | <b>-0.987</b> |
| NA | AACGCT  | 2146.00 | 643  | 0.300 | <b>-1.205</b> |
| NC | AACTGC  | 1868.57 | 2826 | 1.512 | <b>0.414</b>  |
| NC | AACTGT  | 1573.86 | 2016 | 1.281 | <b>0.248</b>  |
| NC | AATTGT  | 1429.00 | 935  | 0.654 | <b>-0.424</b> |
| NC | AATTGC  | 1696.57 | 791  | 0.466 | <b>-0.763</b> |
| ND | AATGAT  | 2555.01 | 4420 | 1.730 | <b>0.548</b>  |
| ND | AATGAC  | 2886.18 | 4521 | 1.566 | <b>0.449</b>  |
| ND | AACGAC  | 3178.77 | 1654 | 0.520 | <b>-0.653</b> |
| ND | AACGAT  | 2814.03 | 839  | 0.298 | <b>-1.210</b> |
| NE | AATGAA  | 3381.19 | 7367 | 2.179 | <b>0.779</b>  |
| NE | AATGAG  | 4521.72 | 5796 | 1.282 | <b>0.248</b>  |
| NE | AACGAG  | 4980.12 | 2476 | 0.497 | <b>-0.699</b> |
| NE | AACGAA  | 3723.97 | 968  | 0.260 | <b>-1.347</b> |
| NF | AACTTC  | 3150.86 | 4259 | 1.352 | <b>0.301</b>  |
| NF | AACTTT  | 2752.85 | 2846 | 1.034 | <b>0.033</b>  |
| NF | AATTTT  | 2499.46 | 2350 | 0.940 | <b>-0.062</b> |
| NF | AAT TTC | 2860.84 | 1809 | 0.632 | <b>-0.458</b> |

|    |        |         |      |       |               |
|----|--------|---------|------|-------|---------------|
| NG | AATGGA | 2235.93 | 4484 | 2.005 | <b>0.696</b>  |
| NG | AATGGT | 1447.59 | 2430 | 1.679 | <b>0.518</b>  |
| NG | AATGGG | 2182.83 | 3202 | 1.467 | <b>0.383</b>  |
| NG | AATGGC | 3031.62 | 4001 | 1.320 | <b>0.277</b>  |
| NG | AACGGG | 2404.12 | 1508 | 0.627 | <b>-0.466</b> |
| NG | AACGGC | 3338.95 | 1752 | 0.525 | <b>-0.645</b> |
| NG | AACGGA | 2462.61 | 804  | 0.326 | <b>-1.119</b> |
| NG | AACGGT | 1594.34 | 517  | 0.324 | <b>-1.126</b> |
| NH | AACCAC | 2167.68 | 2776 | 1.281 | <b>0.247</b>  |
| NH | AACCAT | 1571.93 | 1639 | 1.043 | <b>0.042</b>  |
| NH | AATCAT | 1427.24 | 1456 | 1.020 | <b>0.020</b>  |
| NH | AATCAC | 1968.15 | 1264 | 0.642 | <b>-0.443</b> |
| NI | AACATC | 3876.27 | 5487 | 1.416 | <b>0.348</b>  |
| NI | AACATT | 3065.31 | 3184 | 1.039 | <b>0.038</b>  |
| NI | AATATA | 1280.01 | 1309 | 1.023 | <b>0.022</b>  |
| NI | AACATA | 1409.77 | 1384 | 0.982 | <b>-0.018</b> |
| NI | AATATT | 2783.16 | 2725 | 0.979 | <b>-0.021</b> |
| NI | AATATC | 3519.48 | 1845 | 0.524 | <b>-0.646</b> |
| NK | AACAAG | 4824.98 | 5918 | 1.227 | <b>0.204</b>  |
| NK | AACAAA | 3725.54 | 4221 | 1.133 | <b>0.125</b>  |
| NK | AATAAA | 3382.62 | 3607 | 1.066 | <b>0.064</b>  |
| NK | AATAAG | 4380.86 | 2568 | 0.586 | <b>-0.534</b> |
| NL | AATTTA | 1025.31 | 1571 | 1.532 | <b>0.427</b>  |
| NL | AACCTC | 2807.78 | 3954 | 1.408 | <b>0.342</b>  |
| NL | AACTTG | 1897.05 | 2429 | 1.280 | <b>0.247</b>  |
| NL | AACCTG | 5834.92 | 6690 | 1.147 | <b>0.137</b>  |
| NL | AATTTG | 1722.43 | 1947 | 1.130 | <b>0.123</b>  |
| NL | AATCTT | 1757.88 | 1943 | 1.105 | <b>0.100</b>  |
| NL | AACCTA | 1044.12 | 1135 | 1.087 | <b>0.083</b>  |
| NL | AACCTT | 1936.08 | 2021 | 1.044 | <b>0.043</b>  |
| NL | AACTTA | 1129.25 | 1129 | 1.000 | <b>0.000</b>  |
| NL | AATCTA | 948.01  | 893  | 0.942 | <b>-0.060</b> |
| NL | AATCTC | 2549.34 | 1713 | 0.672 | <b>-0.398</b> |
| NL | AATCTG | 5297.84 | 2525 | 0.477 | <b>-0.741</b> |
| NM | AACATG | 3351.76 | 4374 | 1.305 | <b>0.266</b>  |
| NM | AATATG | 3043.24 | 2021 | 0.664 | <b>-0.409</b> |
| NN | AACAAC | 3150.02 | 4430 | 1.406 | <b>0.341</b>  |
| NN | AACAAT | 2860.08 | 2830 | 0.989 | <b>-0.011</b> |
| NN | AATAAT | 2596.82 | 2424 | 0.933 | <b>-0.069</b> |
| NN | AATAAC | 2860.08 | 1783 | 0.623 | <b>-0.473</b> |
| NP | AACCCC | 2770.02 | 3474 | 1.254 | <b>0.226</b>  |
| NP | AATCCA | 2174.02 | 2380 | 1.095 | <b>0.091</b>  |
| NP | AACCCA | 2394.42 | 2612 | 1.091 | <b>0.087</b>  |
| NP | AATCCT | 2252.58 | 2414 | 1.072 | <b>0.069</b>  |
| NP | AACCCG | 1003.68 | 1048 | 1.044 | <b>0.043</b>  |
| NP | AACCCT | 2480.94 | 2578 | 1.039 | <b>0.038</b>  |
| NP | AATCCC | 2515.05 | 1641 | 0.652 | <b>-0.427</b> |
| NP | AATCCG | 911.29  | 355  | 0.390 | <b>-0.943</b> |
| NQ | AATCAA | 1516.57 | 1905 | 1.256 | <b>0.228</b>  |
| NQ | AACCAA | 1670.31 | 1955 | 1.170 | <b>0.157</b>  |
| NQ | AACCAG | 4664.22 | 5409 | 1.160 | <b>0.148</b>  |
| NQ | AATCAG | 4234.90 | 2817 | 0.665 | <b>-0.408</b> |
| NR | AACAGA | 1511.98 | 2383 | 1.576 | <b>0.455</b>  |

|    |        |         |      |       |               |
|----|--------|---------|------|-------|---------------|
| NR | AACCGC | 1370.77 | 1966 | 1.434 | <b>0.361</b>  |
| NR | AACAGG | 1484.36 | 1903 | 1.282 | <b>0.248</b>  |
| NR | AACCGA | 812.69  | 998  | 1.228 | <b>0.205</b>  |
| NR | AACCGT | 586.88  | 706  | 1.203 | <b>0.185</b>  |
| NR | AACCGG | 1499.21 | 1779 | 1.187 | <b>0.171</b>  |
| NR | AATCGA | 737.89  | 687  | 0.931 | <b>-0.071</b> |
| NR | AATCGT | 532.86  | 486  | 0.912 | <b>-0.092</b> |
| NR | AATAGA | 1372.81 | 1117 | 0.814 | <b>-0.206</b> |
| NR | AATCGC | 1244.60 | 602  | 0.484 | <b>-0.726</b> |
| NR | AATAGG | 1347.73 | 643  | 0.477 | <b>-0.740</b> |
| NR | AATCGG | 1361.22 | 593  | 0.436 | <b>-0.831</b> |
| NS | AACAGC | 2917.73 | 4490 | 1.539 | <b>0.431</b>  |
| NS | AACAGT | 1840.81 | 2414 | 1.311 | <b>0.271</b>  |
| NS | AACTCG | 681.02  | 821  | 1.206 | <b>0.187</b>  |
| NS | AATTCA | 1644.43 | 1970 | 1.198 | <b>0.181</b>  |
| NS | AATTCT | 2034.08 | 2383 | 1.172 | <b>0.158</b>  |
| NS | AACTCC | 2575.33 | 2818 | 1.094 | <b>0.090</b>  |
| NS | AACTCA | 1811.14 | 1783 | 0.984 | <b>-0.016</b> |
| NS | AACTCT | 2240.29 | 1981 | 0.884 | <b>-0.123</b> |
| NS | AATAGT | 1671.38 | 1193 | 0.714 | <b>-0.337</b> |
| NS | AATTCC | 2338.29 | 1655 | 0.708 | <b>-0.346</b> |
| NS | AATAGC | 2649.17 | 1273 | 0.481 | <b>-0.733</b> |
| NS | AATTCG | 618.33  | 241  | 0.390 | <b>-0.942</b> |
| NT | AACACG | 860.22  | 1238 | 1.439 | <b>0.364</b>  |
| NT | AACACA | 2119.90 | 2783 | 1.313 | <b>0.272</b>  |
| NT | AACACC | 2618.65 | 3278 | 1.252 | <b>0.225</b>  |
| NT | AACACT | 1874.68 | 2099 | 1.120 | <b>0.113</b>  |
| NT | AATACT | 1702.13 | 1540 | 0.905 | <b>-0.100</b> |
| NT | AATACA | 1924.77 | 1692 | 0.879 | <b>-0.129</b> |
| NT | AATACC | 2377.62 | 1312 | 0.552 | <b>-0.595</b> |
| NT | AATACG | 781.04  | 317  | 0.406 | <b>-0.902</b> |
| NV | AATGTA | 927.15  | 1710 | 1.844 | <b>0.612</b>  |
| NV | AATGTT | 1427.85 | 2573 | 1.802 | <b>0.589</b>  |
| NV | AATGTC | 1828.10 | 2877 | 1.574 | <b>0.453</b>  |
| NV | AATGTG | 3616.54 | 4314 | 1.193 | <b>0.176</b>  |
| NV | AACGTG | 3983.18 | 2772 | 0.696 | <b>-0.363</b> |
| NV | AACGTC | 2013.43 | 1341 | 0.666 | <b>-0.406</b> |
| NV | AACGTT | 1572.60 | 509  | 0.324 | <b>-1.128</b> |
| NV | AACGTA | 1021.14 | 294  | 0.288 | <b>-1.245</b> |
| NW | AACTGG | 1808.22 | 2595 | 1.435 | <b>0.361</b>  |
| NW | AATGGG | 1641.78 | 855  | 0.521 | <b>-0.652</b> |
| NY | AACTAC | 2506.72 | 3191 | 1.273 | <b>0.241</b>  |
| NY | AACTAT | 2036.89 | 2145 | 1.053 | <b>0.052</b>  |
| NY | AATTAT | 1849.41 | 1795 | 0.971 | <b>-0.030</b> |
| NY | AATTAC | 2275.98 | 1538 | 0.676 | <b>-0.392</b> |
| PA | CCGGCG | 470.57  | 1166 | 2.478 | <b>0.907</b>  |
| PA | CCGGCC | 1740.39 | 2666 | 1.532 | <b>0.426</b>  |
| PA | CCAGCA | 2390.31 | 3368 | 1.409 | <b>0.343</b>  |
| PA | CCAGCT | 2730.54 | 3622 | 1.326 | <b>0.283</b>  |
| PA | CCTGCT | 2829.20 | 3750 | 1.325 | <b>0.282</b>  |
| PA | CCTGCA | 2476.67 | 3178 | 1.283 | <b>0.249</b>  |
| PA | CCAGCC | 4151.96 | 4942 | 1.190 | <b>0.174</b>  |
| PA | CCCGCG | 1298.71 | 1528 | 1.177 | <b>0.163</b>  |

|    |        |         |      |       |               |
|----|--------|---------|------|-------|---------------|
| PA | CCTGCC | 4301.98 | 5000 | 1.162 | <b>0.150</b>  |
| PA | CCAGCG | 1122.61 | 1078 | 0.960 | <b>-0.041</b> |
| PA | CCTGCG | 1163.17 | 1105 | 0.950 | <b>-0.051</b> |
| PA | CCGGCT | 1144.57 | 1013 | 0.885 | <b>-0.122</b> |
| PA | CCGGCA | 1001.95 | 777  | 0.775 | <b>-0.254</b> |
| PA | CCCGCC | 4803.25 | 2690 | 0.560 | <b>-0.580</b> |
| PA | CCCGCA | 2765.26 | 846  | 0.306 | <b>-1.184</b> |
| PA | CCCGCT | 3158.86 | 821  | 0.260 | <b>-1.347</b> |
| PC | CCCTGC | 1550.51 | 2870 | 1.851 | <b>0.616</b>  |
| PC | CCCTGT | 1305.97 | 1577 | 1.208 | <b>0.189</b>  |
| PC | CCGTGC | 561.80  | 630  | 1.121 | <b>0.115</b>  |
| PC | CCTTGT | 1169.67 | 1001 | 0.856 | <b>-0.156</b> |
| PC | CCATGT | 1128.89 | 831  | 0.736 | <b>-0.306</b> |
| PC | CCGTGT | 473.20  | 340  | 0.719 | <b>-0.331</b> |
| PC | CCTTGC | 1388.69 | 937  | 0.675 | <b>-0.393</b> |
| PC | CCATGC | 1340.27 | 733  | 0.547 | <b>-0.603</b> |
| PD | CCAGAT | 2721.60 | 4165 | 1.530 | <b>0.425</b>  |
| PD | CCTGAT | 2819.94 | 3781 | 1.341 | <b>0.293</b>  |
| PD | CCGGAC | 1288.69 | 1659 | 1.287 | <b>0.253</b>  |
| PD | CCAGAC | 3074.36 | 3766 | 1.225 | <b>0.203</b>  |
| PD | CCTGAC | 3185.44 | 3646 | 1.145 | <b>0.135</b>  |
| PD | CCGGAT | 1140.82 | 895  | 0.785 | <b>-0.243</b> |
| PD | CCCGAC | 3556.62 | 2215 | 0.623 | <b>-0.474</b> |
| PD | CCCGAT | 3148.53 | 809  | 0.257 | <b>-1.359</b> |
| PE | CCAGAA | 3999.86 | 5699 | 1.425 | <b>0.354</b>  |
| PE | CCTGAG | 5542.36 | 7122 | 1.285 | <b>0.251</b>  |
| PE | CCGGAG | 2242.20 | 2870 | 1.280 | <b>0.247</b>  |
| PE | CCAGAG | 5349.08 | 6777 | 1.267 | <b>0.237</b>  |
| PE | CCTGAA | 4144.39 | 5108 | 1.233 | <b>0.209</b>  |
| PE | CCCGAG | 6188.17 | 4149 | 0.670 | <b>-0.400</b> |
| PE | CCGGAA | 1676.64 | 1032 | 0.616 | <b>-0.485</b> |
| PE | CCCGAA | 4627.30 | 1013 | 0.219 | <b>-1.519</b> |
| PF | CCCTTC | 2555.92 | 4301 | 1.683 | <b>0.520</b>  |
| PF | CCATTT | 1930.27 | 2057 | 1.066 | <b>0.064</b>  |
| PF | CCTTTT | 2000.01 | 1967 | 0.983 | <b>-0.017</b> |
| PF | CCCTTT | 2233.06 | 2159 | 0.967 | <b>-0.034</b> |
| PF | CCTTTC | 2289.18 | 2078 | 0.908 | <b>-0.097</b> |
| PF | CCGTTC | 926.10  | 662  | 0.715 | <b>-0.336</b> |
| PF | CCATTC | 2209.35 | 1290 | 0.584 | <b>-0.538</b> |
| PF | CCGTTT | 809.12  | 439  | 0.543 | <b>-0.611</b> |
| PG | CCTGGG | 2918.52 | 4310 | 1.477 | <b>0.390</b>  |
| PG | CCTGGA | 2989.52 | 4317 | 1.444 | <b>0.367</b>  |
| PG | CCGGGC | 1639.82 | 2353 | 1.435 | <b>0.361</b>  |
| PG | CCGGGG | 1180.71 | 1657 | 1.403 | <b>0.339</b>  |
| PG | CCTGGT | 1935.48 | 2673 | 1.381 | <b>0.323</b>  |
| PG | CCAGGA | 2885.27 | 3897 | 1.351 | <b>0.301</b>  |
| PG | CCAGGG | 2816.75 | 3472 | 1.233 | <b>0.209</b>  |
| PG | CCAGGT | 1867.98 | 2259 | 1.209 | <b>0.190</b>  |
| PG | CCTGGC | 4053.37 | 4622 | 1.140 | <b>0.131</b>  |
| PG | CCAGGC | 3912.02 | 4106 | 1.050 | <b>0.048</b>  |
| PG | CCGGGT | 783.01  | 661  | 0.844 | <b>-0.169</b> |
| PG | CCGGGA | 1209.43 | 963  | 0.796 | <b>-0.228</b> |
| PG | CCCGGG | 3258.60 | 2136 | 0.655 | <b>-0.422</b> |

|    |        |         |      |       |        |
|----|--------|---------|------|-------|--------|
| PG | CCCGGC | 4525.68 | 2555 | 0.565 | -0.572 |
| PG | CCCGGA | 3337.86 | 968  | 0.290 | -1.238 |
| PG | CCCGGT | 2161.00 | 526  | 0.243 | -1.413 |
| PH | CCGCAC | 725.13  | 972  | 1.340 | 0.293  |
| PH | CCCCAC | 2001.25 | 2505 | 1.252 | 0.225  |
| PH | CCTCAT | 1299.79 | 1592 | 1.225 | 0.203  |
| PH | CCACAT | 1254.46 | 1222 | 0.974 | -0.026 |
| PH | CCCCAT | 1451.24 | 1303 | 0.898 | -0.108 |
| PH | CCTCAC | 1792.40 | 1531 | 0.854 | -0.158 |
| PH | CCACAC | 1729.89 | 1366 | 0.790 | -0.236 |
| PH | CCGCAT | 525.84  | 289  | 0.550 | -0.599 |
| PI | CCCATC | 2119.04 | 4651 | 2.195 | 0.786  |
| PI | CCCATT | 1675.71 | 2102 | 1.254 | 0.227  |
| PI | CCAATA | 666.18  | 819  | 1.229 | 0.207  |
| PI | CCCATA | 770.68  | 776  | 1.007 | 0.007  |
| PI | CCAATT | 1448.49 | 1386 | 0.957 | -0.044 |
| PI | CCTATA | 690.25  | 603  | 0.874 | -0.135 |
| PI | CCTATT | 1500.83 | 1266 | 0.844 | -0.170 |
| PI | CCAATC | 1831.71 | 939  | 0.513 | -0.668 |
| PI | CCTATC | 1897.89 | 957  | 0.504 | -0.685 |
| PI | CCGATT | 607.17  | 299  | 0.492 | -0.708 |
| PI | CCGATC | 767.80  | 342  | 0.445 | -0.809 |
| PI | CCGATA | 279.24  | 115  | 0.412 | -0.887 |
| PK | CCCAAG | 3738.47 | 6383 | 1.707 | 0.535  |
| PK | CCCAAA | 2886.60 | 3787 | 1.312 | 0.271  |
| PK | CCAAAA | 2495.20 | 2489 | 0.998 | -0.002 |
| PK | CCAAAG | 3231.55 | 3127 | 0.968 | -0.033 |
| PK | CCTAAA | 2585.35 | 1840 | 0.712 | -0.340 |
| PK | CCGAAG | 1354.58 | 940  | 0.694 | -0.365 |
| PK | CCTAAG | 3348.32 | 1660 | 0.496 | -0.702 |
| PK | CCGAAA | 1045.92 | 460  | 0.440 | -0.821 |
| PL | CCGCTG | 1824.84 | 3343 | 1.832 | 0.605  |
| PL | CCGCTC | 878.12  | 1254 | 1.428 | 0.356  |
| PL | CCTTTG | 1466.52 | 2054 | 1.401 | 0.337  |
| PL | CCTTTA | 872.97  | 1195 | 1.369 | 0.314  |
| PL | CCCTTG | 1637.40 | 2122 | 1.296 | 0.259  |
| PL | CCTCTT | 1496.70 | 1827 | 1.221 | 0.199  |
| PL | CCCCTG | 5036.31 | 5760 | 1.144 | 0.134  |
| PL | CCCCTC | 2423.49 | 2646 | 1.092 | 0.088  |
| PL | CCTCTA | 807.16  | 871  | 1.079 | 0.076  |
| PL | CCATTA | 842.53  | 826  | 0.980 | -0.020 |
| PL | CCACTT | 1444.51 | 1371 | 0.949 | -0.052 |
| PL | CCACTA | 779.01  | 729  | 0.936 | -0.066 |
| PL | CCTCTC | 2170.57 | 1934 | 0.891 | -0.115 |
| PL | CCTCTG | 4510.71 | 3745 | 0.830 | -0.186 |
| PL | CCATTG | 1415.38 | 1172 | 0.828 | -0.189 |
| PL | CCCCTT | 1671.10 | 1324 | 0.792 | -0.233 |
| PL | CCGCTA | 326.54  | 255  | 0.781 | -0.247 |
| PL | CCCCTA | 901.21  | 689  | 0.765 | -0.268 |
| PL | CCACTG | 4353.41 | 3218 | 0.739 | -0.302 |
| PL | CCCTTA | 974.69  | 709  | 0.727 | -0.318 |
| PL | CCACTC | 2094.88 | 1475 | 0.704 | -0.351 |
| PL | CCGTTG | 593.29  | 402  | 0.678 | -0.389 |



|    |        |         |      |       |        |
|----|--------|---------|------|-------|--------|
| PL | CCGCTT | 605.50  | 402  | 0.664 | -0.410 |
| PL | CCGTTA | 353.17  | 157  | 0.445 | -0.811 |
| PM | CCCATG | 2307.54 | 3923 | 1.700 | 0.531  |
| PM | CCAATG | 1994.65 | 1552 | 0.778 | -0.251 |
| PM | CCGATG | 836.10  | 520  | 0.622 | -0.475 |
| PM | CCTATG | 2066.72 | 1210 | 0.585 | -0.535 |
| PN | CCCAAC | 2313.61 | 4255 | 1.839 | 0.609  |
| PN | CCAAAT | 1815.81 | 2453 | 1.351 | 0.301  |
| PN | CCCAAT | 2100.65 | 2296 | 1.093 | 0.089  |
| PN | CCAAAC | 1999.90 | 1735 | 0.868 | -0.142 |
| PN | CCTAAT | 1881.42 | 1342 | 0.713 | -0.338 |
| PN | CCTAAC | 2072.16 | 997  | 0.481 | -0.732 |
| PN | CCGAAT | 761.14  | 340  | 0.447 | -0.806 |
| PN | CCGAAC | 838.30  | 365  | 0.435 | -0.831 |
| PP | CCGCCG | 608.57  | 2335 | 3.837 | 1.345  |
| PP | CCGCCC | 1679.58 | 2697 | 1.606 | 0.474  |
| PP | CCCCCG | 1679.58 | 2420 | 1.441 | 0.365  |
| PP | CCTCCA | 3588.72 | 4314 | 1.202 | 0.184  |
| PP | CCTCCT | 3718.39 | 4305 | 1.158 | 0.146  |
| PP | CCACCA | 3463.58 | 3850 | 1.112 | 0.106  |
| PP | CCACCT | 3588.72 | 3798 | 1.058 | 0.057  |
| PP | CCCCCA | 4006.89 | 4095 | 1.022 | 0.022  |
| PP | CCACCC | 4006.89 | 3595 | 0.897 | -0.108 |
| PP | CCGCCA | 1451.84 | 1280 | 0.882 | -0.126 |
| PP | CCACCG | 1451.84 | 1252 | 0.862 | -0.148 |
| PP | CCGCCT | 1504.30 | 1286 | 0.855 | -0.157 |
| PP | CCTCCC | 4151.67 | 3338 | 0.804 | -0.218 |
| PP | CCTCCG | 1504.30 | 1152 | 0.766 | -0.267 |
| PP | CCCCCT | 4151.67 | 3160 | 0.761 | -0.273 |
| PP | CCCCCC | 4635.43 | 2315 | 0.499 | -0.694 |
| PQ | CCCCAG | 5063.98 | 6421 | 1.268 | 0.237  |
| PQ | CCGCAG | 1834.86 | 2187 | 1.192 | 0.176  |
| PQ | CCTCAA | 1624.21 | 1752 | 1.079 | 0.076  |
| PQ | CCTCAG | 4535.49 | 4221 | 0.931 | -0.072 |
| PQ | CCACAA | 1567.57 | 1405 | 0.896 | -0.109 |
| PQ | CCACAG | 4377.33 | 3670 | 0.838 | -0.176 |
| PQ | CCCCAA | 1813.47 | 1497 | 0.825 | -0.192 |
| PQ | CCGCAA | 657.08  | 321  | 0.489 | -0.716 |
| PR | CCGCGC | 563.43  | 1094 | 1.942 | 0.664  |
| PR | CCGCGG | 616.23  | 1113 | 1.806 | 0.591  |
| PR | CCCAGG | 1683.86 | 2927 | 1.738 | 0.553  |
| PR | CCCCGG | 1700.71 | 2608 | 1.533 | 0.428  |
| PR | CCCCGC | 1555.00 | 1979 | 1.273 | 0.241  |
| PR | CCCCGA | 921.92  | 1166 | 1.265 | 0.235  |
| PR | CCTCGA | 825.71  | 1015 | 1.229 | 0.206  |
| PR | CCAAGA | 1482.62 | 1608 | 1.085 | 0.081  |
| PR | CCTCGT | 596.27  | 644  | 1.080 | 0.077  |
| PR | CCCAGA | 1715.19 | 1801 | 1.050 | 0.049  |
| PR | CCGAGG | 610.12  | 636  | 1.042 | 0.042  |
| PR | CCTCGG | 1523.22 | 1511 | 0.992 | -0.008 |
| PR | CCCCGT | 665.75  | 655  | 0.984 | -0.016 |
| PR | CCAAGG | 1455.54 | 1347 | 0.925 | -0.077 |
| PR | CCACGA | 796.91  | 632  | 0.793 | -0.232 |



|    |        |         |      |       |               |
|----|--------|---------|------|-------|---------------|
| PR | CCGCGT | 241.23  | 191  | 0.792 | <b>-0.233</b> |
| PR | CCACGT | 575.48  | 418  | 0.726 | <b>-0.320</b> |
| PR | CCACGG | 1470.10 | 1040 | 0.707 | <b>-0.346</b> |
| PR | CCGCGA | 334.04  | 226  | 0.677 | <b>-0.391</b> |
| PR | CCTCGC | 1392.72 | 838  | 0.602 | <b>-0.508</b> |
| PR | CCACGC | 1344.15 | 701  | 0.522 | <b>-0.651</b> |
| PR | CCGAGA | 621.48  | 308  | 0.496 | <b>-0.702</b> |
| PR | CCTAGA | 1536.19 | 692  | 0.450 | <b>-0.797</b> |
| PR | CCTAGG | 1508.13 | 586  | 0.389 | <b>-0.945</b> |
| PS | CCCAGC | 3196.25 | 6398 | 2.002 | <b>0.694</b>  |
| PS | CCCTCG | 746.03  | 1385 | 1.856 | <b>0.619</b>  |
| PS | CCGTCC | 270.31  | 483  | 1.787 | <b>0.580</b>  |
| PS | CCCAGT | 2016.53 | 2743 | 1.360 | <b>0.308</b>  |
| PS | CCTTCA | 1776.97 | 2263 | 1.274 | <b>0.242</b>  |
| PS | CCTTCT | 2198.02 | 2711 | 1.233 | <b>0.210</b>  |
| PS | CCCTCC | 2821.16 | 3353 | 1.189 | <b>0.173</b>  |
| PS | CCATCA | 1715.00 | 1819 | 1.061 | <b>0.059</b>  |
| PS | CCATCT | 2121.37 | 2183 | 1.029 | <b>0.029</b>  |
| PS | CCTTCC | 2526.74 | 2594 | 1.027 | <b>0.026</b>  |
| PS | CCGTCC | 1022.21 | 1048 | 1.025 | <b>0.025</b>  |
| PS | CCCTCA | 1984.02 | 1945 | 0.980 | <b>-0.020</b> |
| PS | CCAAGT | 1743.10 | 1582 | 0.908 | <b>-0.097</b> |
| PS | CCCTCT | 2454.14 | 2113 | 0.861 | <b>-0.150</b> |
| PS | CCTTCG | 668.17  | 552  | 0.826 | <b>-0.191</b> |
| PS | CCATCC | 2438.63 | 1995 | 0.818 | <b>-0.201</b> |
| PS | CCGAGC | 1158.11 | 885  | 0.764 | <b>-0.269</b> |
| PS | CCATCG | 644.87  | 475  | 0.737 | <b>-0.306</b> |
| PS | CCAAGC | 2762.85 | 1659 | 0.600 | <b>-0.510</b> |
| PS | CCGTCT | 889.22  | 523  | 0.588 | <b>-0.531</b> |
| PS | CCGAGT | 730.66  | 371  | 0.508 | <b>-0.678</b> |
| PS | CCGTCA | 718.88  | 364  | 0.506 | <b>-0.681</b> |
| PS | CCTAGT | 1806.08 | 860  | 0.476 | <b>-0.742</b> |
| PS | CCTAGC | 2862.68 | 968  | 0.338 | <b>-1.084</b> |
| PT | CCCACG | 829.55  | 1764 | 2.126 | <b>0.754</b>  |
| PT | CCCACC | 2525.29 | 4586 | 1.816 | <b>0.597</b>  |
| PT | CCCACA | 2044.32 | 2719 | 1.330 | <b>0.285</b>  |
| PT | CCCACT | 1807.85 | 2282 | 1.262 | <b>0.233</b>  |
| PT | CCAACA | 1767.12 | 1895 | 1.072 | <b>0.070</b>  |
| PT | CCAACT | 1562.71 | 1593 | 1.019 | <b>0.019</b>  |
| PT | CCGACG | 300.57  | 305  | 1.015 | <b>0.015</b>  |
| PT | CCTACT | 1619.18 | 1252 | 0.773 | <b>-0.257</b> |
| PT | CCAACC | 2182.87 | 1514 | 0.694 | <b>-0.366</b> |
| PT | CCTACA | 1830.97 | 1241 | 0.678 | <b>-0.389</b> |
| PT | CCGACC | 915.00  | 592  | 0.647 | <b>-0.435</b> |
| PT | CCAACG | 717.06  | 463  | 0.646 | <b>-0.437</b> |
| PT | CCTACC | 2261.75 | 1251 | 0.553 | <b>-0.592</b> |
| PT | CCGACT | 655.05  | 342  | 0.522 | <b>-0.650</b> |
| PT | CCGACA | 740.73  | 352  | 0.475 | <b>-0.744</b> |
| PT | CCTACG | 742.97  | 352  | 0.474 | <b>-0.747</b> |
| PV | CCTGTT | 1493.79 | 2375 | 1.590 | <b>0.464</b>  |
| PV | CCTGTA | 969.97  | 1482 | 1.528 | <b>0.424</b>  |
| PV | CCAGTA | 936.15  | 1352 | 1.444 | <b>0.368</b>  |
| PV | CCTGTG | 3783.57 | 5362 | 1.417 | <b>0.349</b>  |

|    |        |          |       |       |               |
|----|--------|----------|-------|-------|---------------|
| PV | CCAGTT | 1441.70  | 2038  | 1.414 | <b>0.346</b>  |
| PV | CCTGTC | 1912.53  | 2666  | 1.394 | <b>0.332</b>  |
| PV | CCGGTG | 1530.67  | 1911  | 1.248 | <b>0.222</b>  |
| PV | CCAGTG | 3651.63  | 3787  | 1.037 | <b>0.036</b>  |
| PV | CCAGTC | 1845.84  | 1863  | 1.009 | <b>0.009</b>  |
| PV | CCGGTC | 773.73   | 778   | 1.006 | <b>0.006</b>  |
| PV | CCCGTG | 4224.44  | 2576  | 0.610 | <b>-0.495</b> |
| PV | CCGGTT | 604.32   | 351   | 0.581 | <b>-0.543</b> |
| PV | CCGGTA | 392.41   | 215   | 0.548 | <b>-0.602</b> |
| PV | CCCGTC | 2135.39  | 1084  | 0.508 | <b>-0.678</b> |
| PV | CCCGTT | 1667.85  | 391   | 0.234 | <b>-1.451</b> |
| PV | CCCGTA | 1083.00  | 216   | 0.199 | <b>-1.612</b> |
| PW | CCCTGG | 1769.80  | 2753  | 1.556 | <b>0.442</b>  |
| PW | CCGTGG | 641.26   | 661   | 1.031 | <b>0.030</b>  |
| PW | CCATGG | 1529.83  | 1060  | 0.693 | <b>-0.367</b> |
| PW | CCTTGG | 1585.10  | 1052  | 0.664 | <b>-0.410</b> |
| PY | CCCTAC | 2166.25  | 3378  | 1.559 | <b>0.444</b>  |
| PY | CCCTAT | 1760.24  | 2097  | 1.191 | <b>0.175</b>  |
| PY | CCTTAT | 1576.54  | 1702  | 1.080 | <b>0.077</b>  |
| PY | CCATAT | 1521.56  | 1513  | 0.994 | <b>-0.006</b> |
| PY | CCTTAC | 1940.18  | 1485  | 0.765 | <b>-0.267</b> |
| PY | CCGTAC | 784.91   | 592   | 0.754 | <b>-0.282</b> |
| PY | CCGTAT | 637.80   | 429   | 0.673 | <b>-0.397</b> |
| PY | CCATAC | 1872.52  | 1064  | 0.568 | <b>-0.565</b> |
| QA | CAAGCA | 1597.87  | 2339  | 1.464 | <b>0.381</b>  |
| QA | CAAGCT | 1825.31  | 2409  | 1.320 | <b>0.277</b>  |
| QA | CAGGCG | 2095.55  | 2271  | 1.084 | <b>0.080</b>  |
| QA | CAGGCC | 7750.37  | 7695  | 0.993 | <b>-0.007</b> |
| QA | CAAGCC | 2775.49  | 2655  | 0.957 | <b>-0.044</b> |
| QA | CAGGCT | 5097.04  | 4584  | 0.899 | <b>-0.106</b> |
| QA | CAGGCA | 4461.94  | 3943  | 0.884 | <b>-0.124</b> |
| QA | CAAGCG | 750.44   | 458   | 0.610 | <b>-0.494</b> |
| QC | CAGTGT | 2490.13  | 2791  | 1.121 | <b>0.114</b>  |
| QC | CAGTGC | 2956.40  | 3260  | 1.103 | <b>0.098</b>  |
| QC | CAATGT | 891.74   | 822   | 0.922 | <b>-0.081</b> |
| QC | CAATGC | 1058.72  | 524   | 0.495 | <b>-0.703</b> |
| QD | CAAGAT | 2128.42  | 3326  | 1.563 | <b>0.446</b>  |
| QD | CAAGAC | 2404.29  | 2506  | 1.042 | <b>0.041</b>  |
| QD | CAGGAC | 6713.82  | 6642  | 0.989 | <b>-0.011</b> |
| QD | CAGGAT | 5943.46  | 4716  | 0.793 | <b>-0.231</b> |
| QE | CAAGAA | 3247.03  | 5286  | 1.628 | <b>0.487</b>  |
| QE | CAGGAG | 12125.58 | 12556 | 1.035 | <b>0.035</b>  |
| QE | CAAGAG | 4342.30  | 4206  | 0.969 | <b>-0.032</b> |
| QE | CAGGAA | 9067.09  | 6734  | 0.743 | <b>-0.297</b> |
| QF | CAGTTT | 3509.26  | 4032  | 1.149 | <b>0.139</b>  |
| QF | CAGTTC | 4016.64  | 4205  | 1.047 | <b>0.046</b>  |
| QF | CAATTT | 1256.70  | 1156  | 0.920 | <b>-0.084</b> |
| QF | CAATTC | 1438.40  | 828   | 0.576 | <b>-0.552</b> |
| QG | CAAGGA | 1440.03  | 2837  | 1.970 | <b>0.678</b>  |
| QG | CAAGGT | 932.30   | 1506  | 1.615 | <b>0.480</b>  |
| QG | CAAGGG | 1405.83  | 1700  | 1.209 | <b>0.190</b>  |
| QG | CAAGGC | 1952.47  | 2192  | 1.123 | <b>0.116</b>  |
| QG | CAGGGC | 5452.14  | 5605  | 1.028 | <b>0.028</b>  |

|    |        |          |       |       |        |
|----|--------|----------|-------|-------|--------|
| QG | CAGGGT | 2603.39  | 2292  | 0.880 | -0.127 |
| QG | CAGGGA | 4021.17  | 2871  | 0.714 | -0.337 |
| QG | CAGGGG | 3925.67  | 2730  | 0.695 | -0.363 |
| QH | CAACAT | 1067.82  | 1364  | 1.277 | 0.245  |
| QH | CAGCAC | 4111.88  | 4483  | 1.090 | 0.086  |
| QH | CAGCAT | 2981.80  | 2794  | 0.937 | -0.065 |
| QH | CAACAC | 1472.51  | 993   | 0.674 | -0.394 |
| QI | CAAATA | 656.37   | 1125  | 1.714 | 0.539  |
| QI | CAAATT | 1427.17  | 1667  | 1.168 | 0.155  |
| QI | CAGATC | 5039.60  | 5197  | 1.031 | 0.031  |
| QI | CAGATA | 1832.87  | 1802  | 0.983 | -0.017 |
| QI | CAGATT | 3985.26  | 3693  | 0.927 | -0.076 |
| QI | CAAATC | 1804.74  | 1262  | 0.699 | -0.358 |
| QK | CAGAAG | 8990.94  | 9726  | 1.082 | 0.079  |
| QK | CAAAAA | 2486.09  | 2610  | 1.050 | 0.049  |
| QK | CAGAAA | 6942.22  | 6532  | 0.941 | -0.061 |
| QK | CAAAAG | 3219.76  | 2771  | 0.861 | -0.150 |
| QL | CAGCTG | 10304.18 | 12629 | 1.226 | 0.203  |
| QL | CAACTA | 660.31   | 798   | 1.209 | 0.189  |
| QL | CAACTT | 1224.39  | 1479  | 1.208 | 0.189  |
| QL | CAGCTC | 4958.40  | 5986  | 1.207 | 0.188  |
| QL | CAGCTA | 1843.86  | 2002  | 1.086 | 0.082  |
| QL | CAGCTT | 3419.03  | 3476  | 1.017 | 0.017  |
| QL | CAATTA | 714.15   | 642   | 0.899 | -0.107 |
| QL | CAGTTG | 3350.09  | 2597  | 0.775 | -0.255 |
| QL | CAGTTA | 1994.20  | 1518  | 0.761 | -0.273 |
| QL | CAACTC | 1775.66  | 1279  | 0.720 | -0.328 |
| QL | CAACTG | 3690.04  | 2093  | 0.567 | -0.567 |
| QL | CAATTG | 1199.70  | 635   | 0.529 | -0.636 |
| QM | CAGATG | 5587.91  | 5592  | 1.001 | 0.001  |
| QM | CAAATG | 2001.09  | 1997  | 0.998 | -0.002 |
| QN | CAAAAT | 1720.47  | 2394  | 1.391 | 0.330  |
| QN | CAGAAC | 5291.34  | 5195  | 0.982 | -0.018 |
| QN | CAGAAT | 4804.30  | 4430  | 0.922 | -0.081 |
| QN | CAAAAC | 1894.89  | 1692  | 0.893 | -0.113 |
| QP | CAGCCG | 1816.66  | 2237  | 1.231 | 0.208  |
| QP | CAGCCC | 5013.75  | 6143  | 1.225 | 0.203  |
| QP | CAGCCT | 4490.51  | 4526  | 1.008 | 0.008  |
| QP | CAGCCA | 4333.91  | 4235  | 0.977 | -0.023 |
| QP | CAACCA | 1552.02  | 1441  | 0.928 | -0.074 |
| QP | CAACCT | 1608.10  | 1304  | 0.811 | -0.210 |
| QP | CAACCC | 1795.48  | 1132  | 0.630 | -0.461 |
| QP | CAACCG | 650.57   | 243   | 0.374 | -0.985 |
| QQ | CAACAA | 1545.49  | 1866  | 1.207 | 0.188  |
| QQ | CAGCAG | 12051.19 | 13131 | 1.090 | 0.086  |
| QQ | CAGCAA | 4315.66  | 4034  | 0.935 | -0.067 |
| QQ | CAACAG | 4315.66  | 3197  | 0.741 | -0.300 |
| QR | CAAAGA | 1214.45  | 1863  | 1.534 | 0.428  |
| QR | CAGAGG | 3329.32  | 4331  | 1.301 | 0.263  |
| QR | CAAAGG | 1192.27  | 1360  | 1.141 | 0.132  |
| QR | CAGAGA | 3391.27  | 3777  | 1.114 | 0.108  |
| QR | CAGCGC | 3074.54  | 3169  | 1.031 | 0.030  |
| QR | CAGCGG | 3362.63  | 3352  | 0.997 | -0.003 |

|    |         |         |      |       |        |
|----|---------|---------|------|-------|--------|
| QR | CAGCGT  | 1316.32 | 1215 | 0.923 | -0.080 |
| QR | CAGCGA  | 1822.82 | 1469 | 0.806 | -0.216 |
| QR | CAACGT  | 471.39  | 327  | 0.694 | -0.366 |
| QR | CAACGA  | 652.77  | 413  | 0.633 | -0.458 |
| QR | CAACGG  | 1204.20 | 453  | 0.376 | -0.978 |
| QR | CAACGC  | 1101.03 | 404  | 0.367 | -1.003 |
| QS | CAAAGT  | 904.91  | 1408 | 1.556 | 0.442  |
| QS | CAGAGC  | 4005.17 | 5248 | 1.310 | 0.270  |
| QS | CAGAGT  | 2526.89 | 2963 | 1.173 | 0.159  |
| QS | CAAAGC  | 1434.30 | 1465 | 1.021 | 0.021  |
| QS | CAGTCG  | 934.84  | 923  | 0.987 | -0.013 |
| QS | CAGTCA  | 2486.15 | 2379 | 0.957 | -0.044 |
| QS | CAGTCT  | 3075.24 | 2806 | 0.912 | -0.092 |
| QS | CAATCA  | 890.32  | 781  | 0.877 | -0.131 |
| QS | CAGTCC  | 3535.16 | 3051 | 0.863 | -0.147 |
| QS | CAATCT  | 1101.28 | 765  | 0.695 | -0.364 |
| QS | CAATCC  | 1265.98 | 587  | 0.464 | -0.769 |
| QS | CAATCG  | 334.78  | 119  | 0.355 | -1.034 |
| QT | CAAAC T | 1116.05 | 1463 | 1.311 | 0.271  |
| QT | CAAACA  | 1262.03 | 1602 | 1.269 | 0.239  |
| QT | CAGACG  | 1430.02 | 1665 | 1.164 | 0.152  |
| QT | CAGACC  | 4353.25 | 4301 | 0.988 | -0.012 |
| QT | CAGACA  | 3524.12 | 3445 | 0.978 | -0.023 |
| QT | CAGACT  | 3116.48 | 2792 | 0.896 | -0.110 |
| QT | CAAACC  | 1558.95 | 1232 | 0.790 | -0.235 |
| QT | CAAACG  | 512.11  | 373  | 0.728 | -0.317 |
| QV | CAAGTA  | 657.01  | 1210 | 1.842 | 0.611  |
| QV | CAAGTT  | 1011.82 | 1737 | 1.717 | 0.540  |
| QV | CAAGTC  | 1295.45 | 1468 | 1.133 | 0.125  |
| QV | CAAGTG  | 2562.79 | 2712 | 1.058 | 0.057  |
| QV | CAGGTG  | 7156.41 | 7062 | 0.987 | -0.013 |
| QV | CAGGTC  | 3617.45 | 3213 | 0.888 | -0.119 |
| QV | CAGGTT  | 2825.43 | 2269 | 0.803 | -0.219 |
| QV | CAGGTA  | 1834.65 | 1290 | 0.703 | -0.352 |
| QW | CAGTGG  | 3057.92 | 3447 | 1.127 | 0.120  |
| QW | CAATGG  | 1095.08 | 706  | 0.645 | -0.439 |
| QY | CAATAT  | 1029.01 | 1120 | 1.088 | 0.085  |
| QY | CAGTAC  | 3536.21 | 3820 | 1.080 | 0.077  |
| QY | CAGTAT  | 2873.43 | 2979 | 1.037 | 0.036  |
| QY | CAATAC  | 1266.36 | 786  | 0.621 | -0.477 |
| RA | CGGGCG  | 659.18  | 1185 | 1.798 | 0.587  |
| RA | CGGGCC  | 2437.97 | 3513 | 1.441 | 0.365  |
| RA | AGAGCA  | 1415.51 | 1970 | 1.392 | 0.331  |
| RA | CGCGCG  | 602.71  | 827  | 1.372 | 0.316  |
| RA | CGTGCC  | 954.35  | 1266 | 1.327 | 0.283  |
| RA | CGAGCA  | 760.84  | 970  | 1.275 | 0.243  |
| RA | CGAGCT  | 869.13  | 1108 | 1.275 | 0.243  |
| RA | CGAGCC  | 1321.57 | 1595 | 1.207 | 0.188  |
| RA | AGAGCT  | 1616.99 | 1949 | 1.205 | 0.187  |
| RA | CGTGCT  | 627.63  | 744  | 1.185 | 0.170  |
| RA | CGGGCA  | 1403.55 | 1612 | 1.149 | 0.138  |
| RA | CGTGCA  | 549.43  | 570  | 1.037 | 0.037  |
| RA | CGTGCG  | 258.04  | 250  | 0.969 | -0.032 |

|    |        |         |      |       |        |
|----|--------|---------|------|-------|--------|
| RA | CGAGCG | 357.33  | 341  | 0.954 | -0.047 |
| RA | AGGGCC | 2413.81 | 2173 | 0.900 | -0.105 |
| RA | AGAGCC | 2458.73 | 2202 | 0.896 | -0.110 |
| RA | CGGGCT | 1603.33 | 1435 | 0.895 | -0.111 |
| RA | AGGGCA | 1389.65 | 1242 | 0.894 | -0.112 |
| RA | AGGGCT | 1587.45 | 1311 | 0.826 | -0.191 |
| RA | AGGGCG | 652.65  | 524  | 0.803 | -0.220 |
| RA | CGCGCC | 2229.09 | 1712 | 0.768 | -0.264 |
| RA | AGAGCG | 664.79  | 384  | 0.578 | -0.549 |
| RA | CGCGCA | 1283.30 | 331  | 0.258 | -1.355 |
| RA | CGCGCT | 1465.97 | 369  | 0.252 | -1.379 |
| RC | CGCTGC | 986.26  | 2873 | 2.913 | 1.069  |
| RC | CGCTGT | 830.71  | 1313 | 1.581 | 0.458  |
| RC | CGTTGT | 355.66  | 320  | 0.900 | -0.106 |
| RC | CGTTGC | 422.25  | 372  | 0.881 | -0.127 |
| RC | AGATGT | 916.29  | 806  | 0.880 | -0.128 |
| RC | CGATGT | 492.51  | 421  | 0.855 | -0.157 |
| RC | AGGTGT | 899.55  | 671  | 0.746 | -0.293 |
| RC | AGGTGC | 1067.99 | 758  | 0.710 | -0.343 |
| RC | CGATGC | 584.73  | 381  | 0.652 | -0.428 |
| RC | CGGTGC | 1078.67 | 660  | 0.612 | -0.491 |
| RC | AGATGC | 1087.86 | 642  | 0.590 | -0.527 |
| RC | CGGTGT | 908.55  | 414  | 0.456 | -0.786 |
| RD | AGAGAT | 2027.66 | 2952 | 1.456 | 0.376  |
| RD | CGGGAC | 2271.13 | 3231 | 1.423 | 0.353  |
| RD | CGAGAT | 1089.87 | 1500 | 1.376 | 0.319  |
| RD | CGAGAC | 1231.14 | 1693 | 1.375 | 0.319  |
| RD | CGTGAC | 889.05  | 1044 | 1.174 | 0.161  |
| RD | AGAGAC | 2290.48 | 2433 | 1.062 | 0.060  |
| RD | CGTGAT | 787.04  | 833  | 1.058 | 0.057  |
| RD | AGGGAC | 2248.63 | 2322 | 1.033 | 0.032  |
| RD | AGGGAT | 1990.62 | 1732 | 0.870 | -0.139 |
| RD | CGGGAT | 2010.54 | 1606 | 0.799 | -0.225 |
| RD | CGCGAC | 2076.56 | 1092 | 0.526 | -0.643 |
| RD | CGCGAT | 1838.29 | 313  | 0.170 | -1.770 |
| RE | AGAGAA | 2644.21 | 4195 | 1.586 | 0.462  |
| RE | CGGGAG | 3506.29 | 5344 | 1.524 | 0.421  |
| RE | CGAGAG | 1900.69 | 2475 | 1.302 | 0.264  |
| RE | CGAGAA | 1421.27 | 1844 | 1.297 | 0.260  |
| RE | CGTGAG | 1372.55 | 1453 | 1.059 | 0.057  |
| RE | AGGGAG | 3471.55 | 3469 | 0.999 | -0.001 |
| RE | AGAGAG | 3536.15 | 3392 | 0.959 | -0.042 |
| RE | CGTGAA | 1026.35 | 947  | 0.923 | -0.080 |
| RE | AGGGAA | 2595.91 | 2343 | 0.903 | -0.103 |
| RE | CGGGAA | 2621.88 | 2131 | 0.813 | -0.207 |
| RE | CGCGAG | 3205.89 | 1839 | 0.574 | -0.556 |
| RE | CGCGAA | 2397.25 | 268  | 0.112 | -2.191 |
| RF | CGCTTC | 1446.49 | 3411 | 2.358 | 0.858  |
| RF | CGTTTC | 619.29  | 823  | 1.329 | 0.284  |
| RF | CGTTTT | 541.07  | 705  | 1.303 | 0.265  |
| RF | AGATTT | 1393.96 | 1531 | 1.098 | 0.094  |
| RF | CGCTTT | 1263.77 | 1366 | 1.081 | 0.078  |
| RF | CGATTT | 749.26  | 772  | 1.030 | 0.030  |

|    |        |         |      |       |               |
|----|--------|---------|------|-------|---------------|
| RF | AGGTTT | 1368.50 | 1295 | 0.946 | <b>-0.055</b> |
| RF | AGGTTC | 1566.36 | 1192 | 0.761 | <b>-0.273</b> |
| RF | CGATTC | 857.59  | 632  | 0.737 | <b>-0.305</b> |
| RF | CGGTTC | 1582.03 | 951  | 0.601 | <b>-0.509</b> |
| RF | AGATTC | 1595.50 | 944  | 0.592 | <b>-0.525</b> |
| RF | CGGTTT | 1382.19 | 744  | 0.538 | <b>-0.619</b> |
| RG | CGTGGT | 370.38  | 685  | 1.849 | <b>0.615</b>  |
| RG | CGTGGG | 558.50  | 980  | 1.755 | <b>0.562</b>  |
| RG | CGTGGC | 775.66  | 1315 | 1.695 | <b>0.528</b>  |
| RG | CGAGGA | 792.21  | 1266 | 1.598 | <b>0.469</b>  |
| RG | CGAGGG | 773.39  | 1219 | 1.576 | <b>0.455</b>  |
| RG | AGAGGA | 1473.87 | 2281 | 1.548 | <b>0.437</b>  |
| RG | CGAGGT | 512.89  | 789  | 1.538 | <b>0.431</b>  |
| RG | CGGGGC | 1981.48 | 2952 | 1.490 | <b>0.399</b>  |
| RG | CGTGGG | 572.08  | 844  | 1.475 | <b>0.389</b>  |
| RG | CGAGGC | 1074.12 | 1569 | 1.461 | <b>0.379</b>  |
| RG | AGAGGT | 954.21  | 1128 | 1.182 | <b>0.167</b>  |
| RG | CGGGGT | 946.15  | 918  | 0.970 | <b>-0.030</b> |
| RG | CGCGGC | 1811.72 | 1574 | 0.869 | <b>-0.141</b> |
| RG | AGGGGC | 1961.86 | 1660 | 0.846 | <b>-0.167</b> |
| RG | AGAGGC | 1998.36 | 1680 | 0.841 | <b>-0.174</b> |
| RG | AGAGGG | 1438.87 | 1203 | 0.836 | <b>-0.179</b> |
| RG | AGGGGT | 936.78  | 777  | 0.829 | <b>-0.187</b> |
| RG | CGGGGG | 1426.72 | 1146 | 0.803 | <b>-0.219</b> |
| RG | CGGGGA | 1461.42 | 1140 | 0.780 | <b>-0.248</b> |
| RG | CGCGGG | 1304.48 | 904  | 0.693 | <b>-0.367</b> |
| RG | AGGGGA | 1446.94 | 923  | 0.638 | <b>-0.450</b> |
| RG | AGGGGG | 1412.58 | 683  | 0.484 | <b>-0.727</b> |
| RG | CGCGGT | 865.09  | 248  | 0.287 | <b>-1.249</b> |
| RG | CGCGGA | 1336.22 | 302  | 0.226 | <b>-1.487</b> |
| RH | CGCCAC | 1288.00 | 1861 | 1.445 | <b>0.368</b>  |
| RH | CGGCAC | 1408.69 | 1707 | 1.212 | <b>0.192</b>  |
| RH | AGACAT | 1030.24 | 1201 | 1.166 | <b>0.153</b>  |
| RH | CGTCAT | 399.89  | 447  | 1.118 | <b>0.111</b>  |
| RH | AGGCAT | 1011.41 | 988  | 0.977 | <b>-0.023</b> |
| RH | CGACAT | 553.75  | 530  | 0.957 | <b>-0.044</b> |
| RH | AGGCAC | 1394.73 | 1292 | 0.926 | <b>-0.077</b> |
| RH | AGACAC | 1420.69 | 1212 | 0.853 | <b>-0.159</b> |
| RH | CGTCAC | 551.44  | 468  | 0.849 | <b>-0.164</b> |
| RH | CGACAC | 763.62  | 614  | 0.804 | <b>-0.218</b> |
| RH | CGCCAT | 934.02  | 728  | 0.779 | <b>-0.249</b> |
| RH | CGGCAT | 1021.53 | 730  | 0.715 | <b>-0.336</b> |
| RI | CGCATC | 1625.56 | 2948 | 1.814 | <b>0.595</b>  |
| RI | AGAATA | 652.11  | 1175 | 1.802 | <b>0.589</b>  |
| RI | AGAATT | 1417.90 | 2185 | 1.541 | <b>0.432</b>  |
| RI | AGGATA | 640.20  | 804  | 1.256 | <b>0.228</b>  |
| RI | CGAATA | 350.51  | 439  | 1.252 | <b>0.225</b>  |
| RI | CGAATT | 762.13  | 850  | 1.115 | <b>0.109</b>  |
| RI | AGGATT | 1392.00 | 1366 | 0.981 | <b>-0.019</b> |
| RI | AGGATC | 1760.27 | 1662 | 0.944 | <b>-0.057</b> |
| RI | CGAATC | 963.75  | 802  | 0.832 | <b>-0.184</b> |
| RI | CGGATC | 1777.88 | 1479 | 0.832 | <b>-0.184</b> |
| RI | AGAATC | 1793.03 | 1389 | 0.775 | <b>-0.255</b> |

|    |        |         |      |       |        |
|----|--------|---------|------|-------|--------|
| RI | CGTATT | 550.36  | 408  | 0.741 | -0.299 |
| RI | CGCATT | 1285.48 | 913  | 0.710 | -0.342 |
| RI | CGGATA | 646.60  | 451  | 0.697 | -0.360 |
| RI | CGTATC | 695.96  | 440  | 0.632 | -0.459 |
| RI | CGTATA | 253.12  | 152  | 0.601 | -0.510 |
| RI | CGGATT | 1405.93 | 825  | 0.587 | -0.533 |
| RI | CGCATA | 591.21  | 276  | 0.467 | -0.762 |
| RK | AGGAAG | 3199.71 | 4856 | 1.518 | 0.417  |
| RK | AGGAAA | 2470.61 | 3737 | 1.513 | 0.414  |
| RK | AGAAAA | 2516.58 | 3482 | 1.384 | 0.325  |
| RK | CGCAAG | 2954.85 | 2981 | 1.009 | 0.009  |
| RK | CGGAAG | 3231.73 | 3225 | 0.998 | -0.002 |
| RK | AGAAAG | 3259.25 | 2909 | 0.893 | -0.114 |
| RK | CGAAAA | 1352.67 | 1189 | 0.879 | -0.129 |
| RK | CGGAAA | 2495.33 | 1834 | 0.735 | -0.308 |
| RK | CGAAAG | 1751.85 | 1265 | 0.722 | -0.326 |
| RK | CGTAAA | 976.81  | 566  | 0.579 | -0.546 |
| RK | CGCAAA | 2281.54 | 1209 | 0.530 | -0.635 |
| RK | CGTAAG | 1265.08 | 503  | 0.398 | -0.922 |
| RL | CGCCTC | 1491.12 | 2511 | 1.684 | 0.521  |
| RL | CGCCTG | 3098.73 | 4809 | 1.552 | 0.439  |
| RL | CGGCTG | 3389.08 | 5029 | 1.484 | 0.395  |
| RL | CGGCTC | 1630.84 | 2301 | 1.411 | 0.344  |
| RL | CGTTTA | 256.76  | 337  | 1.313 | 0.272  |
| RL | AGATTA | 661.49  | 862  | 1.303 | 0.265  |
| RL | CGTCTT | 440.20  | 562  | 1.277 | 0.244  |
| RL | CGTCTA | 237.40  | 296  | 1.247 | 0.221  |
| RL | CGTTTG | 431.33  | 526  | 1.219 | 0.198  |
| RL | CGTCTC | 638.40  | 723  | 1.133 | 0.124  |
| RL | AGGCTA | 600.44  | 669  | 1.114 | 0.108  |
| RL | AGACTT | 1134.11 | 1227 | 1.082 | 0.079  |
| RL | AGGCTG | 3355.51 | 3531 | 1.052 | 0.051  |
| RL | AGACTA | 611.62  | 617  | 1.009 | 0.009  |
| RL | AGGCTT | 1113.39 | 1104 | 0.992 | -0.008 |
| RL | CGACTA | 328.75  | 324  | 0.986 | -0.015 |
| RL | CGGCTA | 606.45  | 593  | 0.978 | -0.022 |
| RL | CGTCTG | 1326.68 | 1281 | 0.966 | -0.035 |
| RL | AGGCTC | 1614.68 | 1540 | 0.954 | -0.047 |
| RL | CGATTA | 355.55  | 337  | 0.948 | -0.054 |
| RL | CGACTT | 609.59  | 576  | 0.945 | -0.057 |
| RL | CGCCTA | 554.49  | 501  | 0.904 | -0.101 |
| RL | AGGTTA | 649.40  | 586  | 0.902 | -0.103 |
| RL | CGCCTT | 1028.19 | 862  | 0.838 | -0.176 |
| RL | CGCTTG | 1007.46 | 804  | 0.798 | -0.226 |
| RL | CGGCTT | 1124.53 | 866  | 0.770 | -0.261 |
| RL | AGATTG | 1111.24 | 839  | 0.755 | -0.281 |
| RL | CGACTC | 884.04  | 663  | 0.750 | -0.288 |
| RL | AGGTTG | 1090.94 | 774  | 0.709 | -0.343 |
| RL | AGACTC | 1644.73 | 1142 | 0.694 | -0.365 |
| RL | CGATTG | 597.29  | 408  | 0.683 | -0.381 |
| RL | CGACTG | 1837.15 | 1128 | 0.614 | -0.488 |
| RL | CGCTTA | 599.71  | 345  | 0.575 | -0.553 |
| RL | CGGTTG | 1101.86 | 566  | 0.514 | -0.666 |



|    |        |         |      |       |               |
|----|--------|---------|------|-------|---------------|
| RL | AGACTG | 3417.95 | 1701 | 0.498 | <b>-0.698</b> |
| RL | CGGTTA | 655.90  | 297  | 0.453 | <b>-0.792</b> |
| RM | CGCATG | 1558.32 | 1961 | 1.258 | <b>0.230</b>  |
| RM | AGGATG | 1687.45 | 1974 | 1.170 | <b>0.157</b>  |
| RM | CGAATG | 923.88  | 932  | 1.009 | <b>0.009</b>  |
| RM | AGAATG | 1718.85 | 1690 | 0.983 | <b>-0.017</b> |
| RM | CGGATG | 1704.33 | 1374 | 0.806 | <b>-0.215</b> |
| RM | CGTATG | 667.17  | 329  | 0.493 | <b>-0.707</b> |
| RN | AGAAAT | 1568.88 | 2627 | 1.674 | <b>0.515</b>  |
| RN | AGGAAC | 1696.37 | 2200 | 1.297 | <b>0.260</b>  |
| RN | AGGAAT | 1540.22 | 1796 | 1.166 | <b>0.154</b>  |
| RN | AGAAAC | 1727.93 | 1949 | 1.128 | <b>0.120</b>  |
| RN | CGAAAT | 843.28  | 930  | 1.103 | <b>0.098</b>  |
| RN | CGCAAC | 1566.55 | 1575 | 1.005 | <b>0.005</b>  |
| RN | CGGAAC | 1713.34 | 1621 | 0.946 | <b>-0.055</b> |
| RN | CGAAAC | 928.77  | 784  | 0.844 | <b>-0.169</b> |
| RN | CGGAAT | 1555.63 | 1002 | 0.644 | <b>-0.440</b> |
| RN | CGTAAT | 608.96  | 340  | 0.558 | <b>-0.583</b> |
| RN | CGCAAT | 1422.36 | 711  | 0.500 | <b>-0.693</b> |
| RN | CGTAAC | 670.70  | 308  | 0.459 | <b>-0.778</b> |
| RP | CGGCCG | 587.88  | 1226 | 2.085 | <b>0.735</b>  |
| RP | CGGCCC | 1622.47 | 2939 | 1.811 | <b>0.594</b>  |
| RP | CGCCCG | 537.51  | 717  | 1.334 | <b>0.288</b>  |
| RP | AGGCCC | 1606.39 | 1982 | 1.234 | <b>0.210</b>  |
| RP | AGGCCG | 582.05  | 666  | 1.144 | <b>0.135</b>  |
| RP | AGGCCT | 1438.75 | 1642 | 1.141 | <b>0.132</b>  |
| RP | AGGCCA | 1388.57 | 1511 | 1.088 | <b>0.084</b>  |
| RP | CGTCCT | 568.84  | 589  | 1.035 | <b>0.035</b>  |
| RP | AGACCA | 1414.41 | 1387 | 0.981 | <b>-0.020</b> |
| RP | CGGCCT | 1453.14 | 1390 | 0.957 | <b>-0.044</b> |
| RP | AGACCT | 1465.52 | 1398 | 0.954 | <b>-0.047</b> |
| RP | CGTCCC | 635.12  | 582  | 0.916 | <b>-0.087</b> |
| RP | CGGCCA | 1402.47 | 1285 | 0.916 | <b>-0.087</b> |
| RP | CGCCCC | 1483.46 | 1320 | 0.890 | <b>-0.117</b> |
| RP | CGTCCA | 549.00  | 487  | 0.887 | <b>-0.120</b> |
| RP | AGACCC | 1636.29 | 1283 | 0.784 | <b>-0.243</b> |
| RP | CGACCA | 760.25  | 591  | 0.777 | <b>-0.252</b> |
| RP | CGACCC | 879.51  | 671  | 0.763 | <b>-0.271</b> |
| RP | CGACCT | 787.72  | 580  | 0.736 | <b>-0.306</b> |
| RP | CGCCCA | 1282.31 | 887  | 0.692 | <b>-0.369</b> |
| RP | CGTCCG | 230.13  | 159  | 0.691 | <b>-0.370</b> |
| RP | CGCCCT | 1328.65 | 830  | 0.625 | <b>-0.470</b> |
| RP | CGACCG | 318.68  | 184  | 0.577 | <b>-0.549</b> |
| RP | AGACCG | 592.88  | 246  | 0.415 | <b>-0.880</b> |
| RQ | AGACAA | 1054.78 | 1456 | 1.380 | <b>0.322</b>  |
| RQ | CGGCAG | 2920.52 | 3950 | 1.352 | <b>0.302</b>  |
| RQ | CGCCAG | 2670.31 | 3160 | 1.183 | <b>0.168</b>  |
| RQ | AGGCAA | 1035.51 | 1177 | 1.137 | <b>0.128</b>  |
| RQ | AGGCAG | 2891.59 | 3013 | 1.042 | <b>0.041</b>  |
| RQ | CGACAA | 566.95  | 522  | 0.921 | <b>-0.083</b> |
| RQ | CGTCAG | 1143.25 | 953  | 0.834 | <b>-0.182</b> |
| RQ | CGTCAA | 409.41  | 327  | 0.799 | <b>-0.225</b> |
| RQ | CGACAG | 1583.16 | 1249 | 0.789 | <b>-0.237</b> |



|    |        |         |      |       |               |
|----|--------|---------|------|-------|---------------|
| RQ | CGGCAA | 1045.87 | 763  | 0.730 | <b>-0.315</b> |
| RQ | AGACAG | 2945.39 | 2062 | 0.700 | <b>-0.357</b> |
| RQ | CGCCAA | 956.27  | 591  | 0.618 | <b>-0.481</b> |
| RR | CGCCGC | 1172.08 | 2232 | 1.904 | <b>0.644</b>  |
| RR | CGGCGG | 1402.02 | 2316 | 1.652 | <b>0.502</b>  |
| RR | AGAAGA | 1426.00 | 2307 | 1.618 | <b>0.481</b>  |
| RR | CGGCGC | 1281.90 | 2064 | 1.610 | <b>0.476</b>  |
| RR | AGGAGG | 1374.38 | 1973 | 1.436 | <b>0.362</b>  |
| RR | CGCCGG | 1281.90 | 1679 | 1.310 | <b>0.270</b>  |
| RR | CGAAGA | 766.48  | 987  | 1.288 | <b>0.253</b>  |
| RR | AGGAGA | 1399.95 | 1758 | 1.256 | <b>0.228</b>  |
| RR | CGCAGG | 1269.20 | 1565 | 1.233 | <b>0.209</b>  |
| RR | CGGAGG | 1388.13 | 1670 | 1.203 | <b>0.185</b>  |
| RR | CGTCGT | 214.84  | 228  | 1.061 | <b>0.059</b>  |
| RR | CGAAGG | 752.48  | 770  | 1.023 | <b>0.023</b>  |
| RR | CGCCGT | 501.81  | 502  | 1.000 | <b>0.000</b>  |
| RR | AGAAGG | 1399.95 | 1325 | 0.946 | <b>-0.055</b> |
| RR | CGGCGT | 548.83  | 498  | 0.907 | <b>-0.097</b> |
| RR | CGTCGA | 297.51  | 265  | 0.891 | <b>-0.116</b> |
| RR | CGGCGA | 760.01  | 675  | 0.888 | <b>-0.119</b> |
| RR | CGTCGC | 501.81  | 438  | 0.873 | <b>-0.136</b> |
| RR | AGGCGG | 1388.13 | 1177 | 0.848 | <b>-0.165</b> |
| RR | CGTCGG | 548.83  | 450  | 0.820 | <b>-0.199</b> |
| RR | CGACGT | 297.51  | 241  | 0.810 | <b>-0.211</b> |
| RR | CGCCGA | 694.89  | 547  | 0.787 | <b>-0.239</b> |
| RR | AGGCGA | 752.48  | 570  | 0.757 | <b>-0.278</b> |
| RR | CGGAGA | 1413.96 | 1068 | 0.755 | <b>-0.281</b> |
| RR | AGACGA | 766.48  | 557  | 0.727 | <b>-0.319</b> |
| RR | AGGCGT | 543.39  | 383  | 0.705 | <b>-0.350</b> |
| RR | AGGCGC | 1269.20 | 889  | 0.700 | <b>-0.356</b> |
| RR | AGACGT | 553.50  | 376  | 0.679 | <b>-0.387</b> |
| RR | CGACGA | 411.98  | 272  | 0.660 | <b>-0.415</b> |
| RR | CGCAGA | 1292.82 | 771  | 0.596 | <b>-0.517</b> |
| RR | CGACGG | 760.01  | 411  | 0.541 | <b>-0.615</b> |
| RR | CGACGC | 694.89  | 368  | 0.530 | <b>-0.636</b> |
| RR | CGTAGA | 553.50  | 271  | 0.490 | <b>-0.714</b> |
| RR | CGTAGG | 543.39  | 235  | 0.432 | <b>-0.838</b> |
| RR | AGACGC | 1292.82 | 524  | 0.405 | <b>-0.903</b> |
| RR | AGACGG | 1413.96 | 569  | 0.402 | <b>-0.910</b> |
| RS | CGCTCG | 332.61  | 817  | 2.456 | <b>0.899</b>  |
| RS | CGCAGC | 1425.00 | 2853 | 2.002 | <b>0.694</b>  |
| RS | CGCTCC | 1257.78 | 2184 | 1.736 | <b>0.552</b>  |
| RS | AGAAGT | 991.66  | 1532 | 1.545 | <b>0.435</b>  |
| RS | CGTTCT | 468.44  | 687  | 1.467 | <b>0.383</b>  |
| RS | CGAAGT | 533.02  | 728  | 1.366 | <b>0.312</b>  |
| RS | CGTTCC | 538.50  | 707  | 1.313 | <b>0.272</b>  |
| RS | AGGAGC | 1543.09 | 1992 | 1.291 | <b>0.255</b>  |
| RS | CGTTCA | 378.71  | 471  | 1.244 | <b>0.218</b>  |
| RS | CGGAGC | 1558.53 | 1856 | 1.191 | <b>0.175</b>  |
| RS | AGGAGT | 973.54  | 1071 | 1.100 | <b>0.095</b>  |
| RS | AGAAGC | 1571.80 | 1628 | 1.036 | <b>0.035</b>  |
| RS | AGATCA | 975.67  | 1000 | 1.025 | <b>0.025</b>  |
| RS | CGAAGC | 844.85  | 859  | 1.017 | <b>0.017</b>  |

|    |         |         |      |       |               |
|----|---------|---------|------|-------|---------------|
| RS | CGCTCA  | 884.55  | 860  | 0.972 | <b>-0.028</b> |
| RS | CGCAGT  | 899.04  | 853  | 0.949 | <b>-0.053</b> |
| RS | AGATCT  | 1206.86 | 1106 | 0.916 | <b>-0.087</b> |
| RS | CGCTCT  | 1094.14 | 942  | 0.861 | <b>-0.150</b> |
| RS | CGTTCCG | 142.40  | 121  | 0.850 | <b>-0.163</b> |
| RS | AGGTCA  | 957.85  | 808  | 0.844 | <b>-0.170</b> |
| RS | CGATCA  | 524.43  | 416  | 0.793 | <b>-0.232</b> |
| RS | AGGTCT  | 1184.81 | 939  | 0.793 | <b>-0.233</b> |
| RS | AGGTCCG | 360.17  | 284  | 0.789 | <b>-0.238</b> |
| RS | CGATCT  | 648.69  | 497  | 0.766 | <b>-0.266</b> |
| RS | AGGTCC  | 1362.00 | 1036 | 0.761 | <b>-0.274</b> |
| RS | CGGAGT  | 983.28  | 745  | 0.758 | <b>-0.278</b> |
| RS | CGTAGT  | 384.91  | 278  | 0.722 | <b>-0.325</b> |
| RS | CGGTCCG | 363.77  | 235  | 0.646 | <b>-0.437</b> |
| RS | CGATCC  | 745.70  | 455  | 0.610 | <b>-0.494</b> |
| RS | AGATCC  | 1387.35 | 830  | 0.598 | <b>-0.514</b> |
| RS | CGGTCC  | 1375.63 | 821  | 0.597 | <b>-0.516</b> |
| RS | CGATCG  | 197.19  | 107  | 0.543 | <b>-0.611</b> |
| RS | CGGTCA  | 967.43  | 507  | 0.524 | <b>-0.646</b> |
| RS | CGTAGC  | 610.09  | 317  | 0.520 | <b>-0.655</b> |
| RS | AGATCG  | 366.87  | 177  | 0.482 | <b>-0.729</b> |
| RS | CGGTCT  | 1196.66 | 518  | 0.433 | <b>-0.837</b> |
| RT | CGCACG  | 450.78  | 858  | 1.903 | <b>0.644</b>  |
| RT | AGAACT  | 1083.61 | 1467 | 1.354 | <b>0.303</b>  |
| RT | CGCACC  | 1372.27 | 1821 | 1.327 | <b>0.283</b>  |
| RT | AGGACG  | 488.14  | 646  | 1.323 | <b>0.280</b>  |
| RT | AGGACT  | 1063.81 | 1389 | 1.306 | <b>0.267</b>  |
| RT | AGAACA  | 1225.34 | 1575 | 1.285 | <b>0.251</b>  |
| RT | AGGACA  | 1202.96 | 1523 | 1.266 | <b>0.236</b>  |
| RT | AGGACC  | 1485.98 | 1773 | 1.193 | <b>0.177</b>  |
| RT | CGGACG  | 493.02  | 537  | 1.089 | <b>0.085</b>  |
| RT | CGAACA  | 658.62  | 661  | 1.004 | <b>0.004</b>  |
| RT | CGAACT  | 582.44  | 556  | 0.955 | <b>-0.046</b> |
| RT | CGGACC  | 1500.85 | 1408 | 0.938 | <b>-0.064</b> |
| RT | CGCACA  | 1110.90 | 984  | 0.886 | <b>-0.121</b> |
| RT | CGGACA  | 1215.00 | 949  | 0.781 | <b>-0.247</b> |
| RT | AGAACC  | 1513.63 | 1166 | 0.770 | <b>-0.261</b> |
| RT | CGTACT  | 420.60  | 313  | 0.744 | <b>-0.295</b> |
| RT | CGAACC  | 813.58  | 599  | 0.736 | <b>-0.306</b> |
| RT | CGGACT  | 1074.45 | 712  | 0.663 | <b>-0.411</b> |
| RT | CGCACT  | 982.40  | 638  | 0.649 | <b>-0.432</b> |
| RT | CGTACC  | 587.52  | 361  | 0.614 | <b>-0.487</b> |
| RT | AGAACG  | 497.22  | 302  | 0.607 | <b>-0.499</b> |
| RT | CGTACA  | 475.62  | 288  | 0.606 | <b>-0.502</b> |
| RT | CGAACG  | 267.26  | 154  | 0.576 | <b>-0.551</b> |
| RT | CGTACG  | 193.00  | 79   | 0.409 | <b>-0.893</b> |
| RV | CGTGTG  | 889.90  | 1699 | 1.909 | <b>0.647</b>  |
| RV | CGTGTC  | 449.83  | 826  | 1.836 | <b>0.608</b>  |
| RV | CGAGTA  | 315.92  | 562  | 1.779 | <b>0.576</b>  |
| RV | CGTGTA  | 228.14  | 391  | 1.714 | <b>0.539</b>  |
| RV | CGTGTT  | 351.34  | 565  | 1.608 | <b>0.475</b>  |
| RV | AGAGTT  | 905.17  | 1350 | 1.491 | <b>0.400</b>  |
| RV | AGAGTA  | 587.76  | 876  | 1.490 | <b>0.399</b>  |

|    |        |         |      |       |               |
|----|--------|---------|------|-------|---------------|
| RV | CGAGTC | 622.91  | 914  | 1.467 | <b>0.383</b>  |
| RV | CGAGTT | 486.53  | 681  | 1.400 | <b>0.336</b>  |
| RV | CGAGTG | 1232.31 | 1576 | 1.279 | <b>0.246</b>  |
| RV | CGGGTC | 1149.12 | 1310 | 1.140 | <b>0.131</b>  |
| RV | AGGGTC | 1137.73 | 1221 | 1.073 | <b>0.071</b>  |
| RV | CGGGTG | 2273.30 | 2328 | 1.024 | <b>0.024</b>  |
| RV | AGAGTC | 1158.91 | 1154 | 0.996 | <b>-0.004</b> |
| RV | CGCGTG | 2078.54 | 1725 | 0.830 | <b>-0.186</b> |
| RV | AGGGTA | 577.02  | 471  | 0.816 | <b>-0.203</b> |
| RV | AGAGTG | 2292.67 | 1750 | 0.763 | <b>-0.270</b> |
| RV | CGGGTA | 582.79  | 438  | 0.752 | <b>-0.286</b> |
| RV | AGGGTG | 2250.78 | 1658 | 0.737 | <b>-0.306</b> |
| RV | CGCGTC | 1050.67 | 763  | 0.726 | <b>-0.320</b> |
| RV | AGGGTT | 888.63  | 645  | 0.726 | <b>-0.320</b> |
| RV | CGGGTT | 897.52  | 548  | 0.611 | <b>-0.493</b> |
| RV | CGCGTA | 532.86  | 132  | 0.248 | <b>-1.395</b> |
| RV | CGCGTT | 820.63  | 178  | 0.217 | <b>-1.528</b> |
| RW | CGCTGG | 1038.00 | 2199 | 2.118 | <b>0.751</b>  |
| RW | CGTTGG | 444.40  | 380  | 0.855 | <b>-0.157</b> |
| RW | AGGTGG | 1124.01 | 876  | 0.779 | <b>-0.249</b> |
| RW | CGATGG | 615.40  | 466  | 0.757 | <b>-0.278</b> |
| RW | AGATGG | 1144.93 | 804  | 0.702 | <b>-0.353</b> |
| RW | CGGTGG | 1135.26 | 777  | 0.684 | <b>-0.379</b> |
| RY | CGCTAC | 1173.12 | 2612 | 2.227 | <b>0.800</b>  |
| RY | CGCTAT | 953.25  | 1198 | 1.257 | <b>0.229</b>  |
| RY | CGTTAC | 502.25  | 565  | 1.125 | <b>0.118</b>  |
| RY | CGTTAT | 408.12  | 459  | 1.125 | <b>0.117</b>  |
| RY | AGATAT | 1051.45 | 1018 | 0.968 | <b>-0.032</b> |
| RY | AGATAC | 1293.97 | 1239 | 0.958 | <b>-0.043</b> |
| RY | CGATAT | 565.15  | 509  | 0.901 | <b>-0.105</b> |
| RY | CGATAC | 695.51  | 584  | 0.840 | <b>-0.175</b> |
| RY | AGGTAC | 1270.33 | 1007 | 0.793 | <b>-0.232</b> |
| RY | AGGTAT | 1032.24 | 769  | 0.745 | <b>-0.294</b> |
| RY | CGGTAC | 1283.04 | 856  | 0.667 | <b>-0.405</b> |
| RY | CGGTAT | 1042.57 | 455  | 0.436 | <b>-0.829</b> |
| SA | TCGGCG | 241.39  | 778  | 3.223 | <b>1.170</b>  |
| SA | TCGGCC | 892.76  | 1976 | 2.213 | <b>0.795</b>  |
| SA | TCAGCA | 1366.87 | 2526 | 1.848 | <b>0.614</b>  |
| SA | TCTGCA | 1690.75 | 3035 | 1.795 | <b>0.585</b>  |
| SA | TCTGCT | 1931.41 | 3350 | 1.734 | <b>0.551</b>  |
| SA | TCAGCT | 1561.43 | 2630 | 1.684 | <b>0.521</b>  |
| SA | AGTGCT | 1587.01 | 2487 | 1.567 | <b>0.449</b>  |
| SA | AGTGCA | 1389.27 | 2040 | 1.468 | <b>0.384</b>  |
| SA | AGTGCC | 2413.15 | 3437 | 1.424 | <b>0.354</b>  |
| SA | TCAGCC | 2374.25 | 3294 | 1.387 | <b>0.327</b>  |
| SA | TCGGCT | 587.12  | 808  | 1.376 | <b>0.319</b>  |
| SA | TCTGCC | 2936.83 | 3480 | 1.185 | <b>0.170</b>  |
| SA | TCGGCA | 513.97  | 598  | 1.163 | <b>0.151</b>  |
| SA | TCTGCG | 794.06  | 745  | 0.938 | <b>-0.064</b> |
| SA | TCAGCG | 641.95  | 584  | 0.910 | <b>-0.095</b> |
| SA | AGTGCG | 652.47  | 532  | 0.815 | <b>-0.204</b> |
| SA | AGCGCG | 1034.18 | 802  | 0.775 | <b>-0.254</b> |
| SA | AGCGCC | 3824.90 | 2428 | 0.635 | <b>-0.454</b> |

|    |        |         |      |       |        |
|----|--------|---------|------|-------|--------|
| SA | TCCGCG | 912.82  | 577  | 0.632 | -0.459 |
| SA | TCCGCC | 3376.05 | 1230 | 0.364 | -1.010 |
| SA | AGCGCT | 2515.45 | 709  | 0.282 | -1.266 |
| SA | AGCGCA | 2202.02 | 601  | 0.273 | -1.299 |
| SA | TCCGCA | 1943.61 | 476  | 0.245 | -1.407 |
| SA | TCCGCT | 2220.26 | 481  | 0.217 | -1.530 |
| SC | TCCTGC | 1640.34 | 2828 | 1.724 | 0.545  |
| SC | AGCTGC | 1858.43 | 3034 | 1.633 | 0.490  |
| SC | TCCTGT | 1381.63 | 1779 | 1.288 | 0.253  |
| SC | AGCTGT | 1565.33 | 1922 | 1.228 | 0.205  |
| SC | TCGTGC | 433.77  | 361  | 0.832 | -0.184 |
| SC | TCTTGT | 1201.89 | 941  | 0.783 | -0.245 |
| SC | AGTTGT | 987.57  | 698  | 0.707 | -0.347 |
| SC | TCGTGT | 365.36  | 225  | 0.616 | -0.485 |
| SC | TCATGT | 971.65  | 584  | 0.601 | -0.509 |
| SC | TCTTGC | 1426.94 | 758  | 0.531 | -0.633 |
| SC | TCATGC | 1153.59 | 525  | 0.455 | -0.787 |
| SC | AGTTGC | 1172.49 | 504  | 0.430 | -0.844 |
| SD | TCAGAT | 1978.63 | 3706 | 1.873 | 0.628  |
| SD | AGTGAT | 2011.05 | 3683 | 1.831 | 0.605  |
| SD | AGTGAC | 2271.71 | 4040 | 1.778 | 0.576  |
| SD | TCGGAC | 840.43  | 1438 | 1.711 | 0.537  |
| SD | TCTGAT | 2447.46 | 3578 | 1.462 | 0.380  |
| SD | TCAGAC | 2235.09 | 2906 | 1.300 | 0.262  |
| SD | TCGGAT | 744.00  | 840  | 1.129 | 0.121  |
| SD | TCTGAC | 2764.69 | 2949 | 1.067 | 0.065  |
| SD | AGCGAC | 3600.71 | 2017 | 0.560 | -0.580 |
| SD | TCCGAC | 3178.17 | 1336 | 0.420 | -0.867 |
| SD | AGCGAT | 3187.56 | 920  | 0.289 | -1.243 |
| SD | TCCGAT | 2813.50 | 660  | 0.235 | -1.450 |
| SE | TCAGAA | 2420.84 | 4815 | 1.989 | 0.688  |
| SE | AGTGAA | 2460.50 | 4686 | 1.904 | 0.644  |
| SE | TCGGAG | 1217.33 | 2184 | 1.794 | 0.584  |
| SE | TCTGAA | 2994.45 | 4621 | 1.543 | 0.434  |
| SE | TCAGAG | 3237.43 | 4683 | 1.447 | 0.369  |
| SE | AGTGAG | 3290.47 | 4410 | 1.340 | 0.293  |
| SE | TCTGAG | 4004.54 | 4891 | 1.221 | 0.200  |
| SE | TCGGAA | 910.28  | 879  | 0.966 | -0.035 |
| SE | AGCGAG | 5215.47 | 2961 | 0.568 | -0.566 |
| SE | TCCGAG | 4603.44 | 2005 | 0.436 | -0.831 |
| SE | AGCGAA | 3899.95 | 847  | 0.217 | -1.527 |
| SE | TCCGAA | 3442.29 | 715  | 0.208 | -1.572 |
| SF | TCCTTC | 2645.79 | 4407 | 1.666 | 0.510  |
| SF | AGCTTC | 2997.56 | 3942 | 1.315 | 0.274  |
| SF | TCATTT | 1625.65 | 1773 | 1.091 | 0.087  |
| SF | TCCTTT | 2311.58 | 2487 | 1.076 | 0.073  |
| SF | AGTTTT | 1652.29 | 1695 | 1.026 | 0.026  |
| SF | AGCTTT | 2618.91 | 2370 | 0.905 | -0.100 |
| SF | TCTTTT | 2010.85 | 1809 | 0.900 | -0.106 |
| SF | TCTTTC | 2301.58 | 1728 | 0.751 | -0.287 |
| SF | AGTTTC | 1891.18 | 1353 | 0.715 | -0.335 |
| SF | TCGTTT | 611.27  | 342  | 0.559 | -0.581 |
| SF | TCATTC | 1860.69 | 991  | 0.533 | -0.630 |

|    |        |         |      |       |               |
|----|--------|---------|------|-------|---------------|
| SF | TCGTTC | 699.65  | 330  | 0.472 | <b>-0.751</b> |
| SG | AGTGGT | 1051.00 | 2094 | 1.992 | <b>0.689</b>  |
| SG | TCGGGG | 586.31  | 1117 | 1.905 | <b>0.645</b>  |
| SG | TCGGGC | 814.29  | 1487 | 1.826 | <b>0.602</b>  |
| SG | AGTGGA | 1623.36 | 2932 | 1.806 | <b>0.591</b>  |
| SG | TCAGGA | 1597.19 | 2760 | 1.728 | <b>0.547</b>  |
| SG | TCTGGA | 1975.64 | 3391 | 1.716 | <b>0.540</b>  |
| SG | AGTGGG | 1584.81 | 2584 | 1.630 | <b>0.489</b>  |
| SG | TCTGGG | 1928.73 | 2974 | 1.542 | <b>0.433</b>  |
| SG | AGTGGC | 2201.05 | 3314 | 1.506 | <b>0.409</b>  |
| SG | TCTGGT | 1279.07 | 1902 | 1.487 | <b>0.397</b>  |
| SG | TCAGGG | 1559.26 | 2161 | 1.386 | <b>0.326</b>  |
| SG | TCAGGT | 1034.06 | 1351 | 1.307 | <b>0.267</b>  |
| SG | TCGGGA | 600.57  | 684  | 1.139 | <b>0.130</b>  |
| SG | TCGGGT | 388.82  | 410  | 1.054 | <b>0.053</b>  |
| SG | TCTGGC | 2678.70 | 2734 | 1.021 | <b>0.020</b>  |
| SG | TCAGGC | 2165.57 | 2114 | 0.976 | <b>-0.024</b> |
| SG | AGCGGC | 3488.72 | 2475 | 0.709 | <b>-0.343</b> |
| SG | AGCGGG | 2511.96 | 1464 | 0.583 | <b>-0.540</b> |
| SG | TCCGGG | 2217.18 | 1117 | 0.504 | <b>-0.686</b> |
| SG | TCCGGC | 3079.31 | 1163 | 0.378 | <b>-0.974</b> |
| SG | AGCGGT | 1665.85 | 536  | 0.322 | <b>-1.134</b> |
| SG | AGCGGA | 2573.06 | 663  | 0.258 | <b>-1.356</b> |
| SG | TCCGGA | 2271.11 | 560  | 0.247 | <b>-1.400</b> |
| SG | TCCGGT | 1470.37 | 359  | 0.244 | <b>-1.410</b> |
| SH | AGCCAC | 2202.27 | 3210 | 1.458 | <b>0.377</b>  |
| SH | TCTCAT | 1226.22 | 1426 | 1.163 | <b>0.151</b>  |
| SH | TCCCAC | 1943.83 | 2233 | 1.149 | <b>0.139</b>  |
| SH | AGTCAT | 1007.57 | 1082 | 1.074 | <b>0.071</b>  |
| SH | AGCCAT | 1597.01 | 1606 | 1.006 | <b>0.006</b>  |
| SH | TCGCAC | 514.03  | 512  | 0.996 | <b>-0.004</b> |
| SH | TCCCAT | 1409.60 | 1349 | 0.957 | <b>-0.044</b> |
| SH | TCACAT | 991.32  | 929  | 0.937 | <b>-0.065</b> |
| SH | AGTCAC | 1389.42 | 1077 | 0.775 | <b>-0.255</b> |
| SH | TCACAC | 1367.03 | 956  | 0.699 | <b>-0.358</b> |
| SH | TCTCAC | 1690.94 | 1158 | 0.685 | <b>-0.379</b> |
| SH | TCGCAT | 372.75  | 174  | 0.467 | <b>-0.762</b> |
| SI | TCCATC | 2374.96 | 4526 | 1.906 | <b>0.645</b>  |
| SI | AGCATC | 2690.72 | 4471 | 1.662 | <b>0.508</b>  |
| SI | TCCATT | 1878.09 | 2383 | 1.269 | <b>0.238</b>  |
| SI | AGCATT | 2127.79 | 2384 | 1.120 | <b>0.114</b>  |
| SI | TCCATA | 863.76  | 963  | 1.115 | <b>0.109</b>  |
| SI | AGTATA | 617.40  | 640  | 1.037 | <b>0.036</b>  |
| SI | TCAATA | 607.45  | 618  | 1.017 | <b>0.017</b>  |
| SI | AGTATT | 1342.43 | 1299 | 0.968 | <b>-0.033</b> |
| SI | AGCATA | 978.60  | 943  | 0.964 | <b>-0.037</b> |
| SI | TCTATA | 751.38  | 658  | 0.876 | <b>-0.133</b> |
| SI | TCTATT | 1633.75 | 1215 | 0.744 | <b>-0.296</b> |
| SI | TCAATT | 1320.79 | 957  | 0.725 | <b>-0.322</b> |
| SI | AGTATC | 1697.59 | 924  | 0.544 | <b>-0.608</b> |
| SI | TCGATA | 228.41  | 109  | 0.477 | <b>-0.740</b> |
| SI | TCTATC | 2065.98 | 958  | 0.464 | <b>-0.769</b> |
| SI | TCGATT | 496.64  | 185  | 0.373 | <b>-0.988</b> |

|    |        |         |      |       |        |
|----|--------|---------|------|-------|--------|
| SI | TCAATC | 1670.22 | 557  | 0.333 | -1.098 |
| SI | TCGATC | 628.03  | 184  | 0.293 | -1.228 |
| SK | TCCAAG | 3563.99 | 5021 | 1.409 | 0.343  |
| SK | TCCAAA | 2751.88 | 3634 | 1.321 | 0.278  |
| SK | AGCAAG | 4037.83 | 5128 | 1.270 | 0.239  |
| SK | AGCAAA | 3117.75 | 3736 | 1.198 | 0.181  |
| SK | TCAAAA | 1935.30 | 2282 | 1.179 | 0.165  |
| SK | AGTAAA | 1967.01 | 2149 | 1.093 | 0.088  |
| SK | TCAAAG | 2506.42 | 2082 | 0.831 | -0.186 |
| SK | TCTAAA | 2393.86 | 1838 | 0.768 | -0.264 |
| SK | TCGAAG | 942.46  | 522  | 0.554 | -0.591 |
| SK | AGTAAG | 2547.49 | 1300 | 0.510 | -0.673 |
| SK | TCTAAG | 3100.32 | 1569 | 0.506 | -0.681 |
| SK | TCGAAA | 727.71  | 331  | 0.455 | -0.788 |
| SL | AGTTTA | 709.05  | 1103 | 1.556 | 0.442  |
| SL | TCGCTG | 1355.42 | 2104 | 1.552 | 0.440  |
| SL | TCCTTG | 1666.44 | 2462 | 1.477 | 0.390  |
| SL | TCTTTA | 862.92  | 1267 | 1.468 | 0.384  |
| SL | AGCCTC | 2794.39 | 4013 | 1.436 | 0.362  |
| SL | TCTTTG | 1449.64 | 2009 | 1.386 | 0.326  |
| SL | TCATTA | 697.62  | 862  | 1.236 | 0.212  |
| SL | AGCCTG | 5807.08 | 7014 | 1.208 | 0.189  |
| SL | AGTTTG | 1191.15 | 1427 | 1.198 | 0.181  |
| SL | TCGCTC | 652.23  | 777  | 1.191 | 0.175  |
| SL | TCTCTA | 797.87  | 950  | 1.191 | 0.175  |
| SL | TCTCTT | 1479.47 | 1750 | 1.183 | 0.168  |
| SL | TCCCTG | 5125.62 | 6034 | 1.177 | 0.163  |
| SL | TCCCTC | 2466.46 | 2805 | 1.137 | 0.129  |
| SL | TCCTTA | 991.98  | 1076 | 1.085 | 0.081  |
| SL | AGTCTT | 1215.66 | 1242 | 1.022 | 0.021  |
| SL | AGCCTT | 1926.85 | 1959 | 1.017 | 0.017  |
| SL | TCACTA | 645.03  | 630  | 0.977 | -0.024 |
| SL | AGCTTG | 1888.00 | 1786 | 0.946 | -0.056 |
| SL | TCACTT | 1196.06 | 1111 | 0.929 | -0.074 |
| SL | TCCCTT | 1700.73 | 1545 | 0.908 | -0.096 |
| SL | TCCCTA | 917.19  | 810  | 0.883 | -0.124 |
| SL | AGTCTA | 655.60  | 569  | 0.868 | -0.142 |
| SL | TCATTG | 1171.95 | 1015 | 0.866 | -0.144 |
| SL | AGCCTA | 1039.14 | 875  | 0.842 | -0.172 |
| SL | TCTCTC | 2145.58 | 1760 | 0.820 | -0.198 |
| SL | TCTCTG | 4458.78 | 3418 | 0.767 | -0.266 |
| SL | AGCTTA | 1123.86 | 758  | 0.674 | -0.394 |
| SL | AGTCTC | 1763.00 | 1158 | 0.657 | -0.420 |
| SL | TCGTTG | 440.67  | 280  | 0.635 | -0.454 |
| SL | TCACTC | 1734.58 | 1100 | 0.634 | -0.455 |
| SL | TCACTG | 3604.66 | 2254 | 0.625 | -0.470 |
| SL | TCGCTT | 449.74  | 279  | 0.620 | -0.477 |
| SL | TCGCTA | 242.54  | 143  | 0.590 | -0.528 |
| SL | TCGTTA | 262.32  | 140  | 0.534 | -0.628 |
| SL | AGTCTG | 3663.72 | 1808 | 0.493 | -0.706 |
| SM | TCCATG | 2282.65 | 3908 | 1.712 | 0.538  |
| SM | AGCATG | 2586.13 | 3300 | 1.276 | 0.244  |
| SM | TCAATG | 1605.31 | 1129 | 0.703 | -0.352 |

|    |        |         |      |       |               |
|----|--------|---------|------|-------|---------------|
| SM | TCGATG | 603.62  | 365  | 0.605 | <b>-0.503</b> |
| SM | AGTATG | 1631.61 | 966  | 0.592 | <b>-0.524</b> |
| SM | TCTATG | 1985.68 | 1027 | 0.517 | <b>-0.659</b> |
| SN | AGCAAC | 2539.42 | 3717 | 1.464 | <b>0.381</b>  |
| SN | TCCAAC | 2241.42 | 3216 | 1.435 | <b>0.361</b>  |
| SN | TCAAAT | 1431.22 | 1883 | 1.316 | <b>0.274</b>  |
| SN | AGCAAT | 2305.68 | 2513 | 1.090 | <b>0.086</b>  |
| SN | TCCAAT | 2035.11 | 2000 | 0.983 | <b>-0.017</b> |
| SN | AGTAAT | 1454.67 | 1425 | 0.980 | <b>-0.021</b> |
| SN | AGTAAC | 1602.14 | 1339 | 0.836 | <b>-0.179</b> |
| SN | TCAAAC | 1576.31 | 1194 | 0.757 | <b>-0.278</b> |
| SN | TCTAAT | 1770.34 | 1297 | 0.733 | <b>-0.311</b> |
| SN | TCTAAC | 1949.81 | 955  | 0.490 | <b>-0.714</b> |
| SN | TCGAAT | 538.16  | 258  | 0.479 | <b>-0.735</b> |
| SN | TCGAAC | 592.72  | 240  | 0.405 | <b>-0.904</b> |
| SP | TCGCCG | 282.21  | 549  | 1.945 | <b>0.665</b>  |
| SP | TCGCC  | 778.87  | 1221 | 1.568 | <b>0.450</b>  |
| SP | TCCCCG | 1067.21 | 1621 | 1.519 | <b>0.418</b>  |
| SP | TCTCCA | 2214.76 | 3119 | 1.408 | <b>0.342</b>  |
| SP | AGCCCC | 3336.96 | 4654 | 1.395 | <b>0.333</b>  |
| SP | TCTCCT | 2294.78 | 2888 | 1.259 | <b>0.230</b>  |
| SP | AGCCCG | 1209.10 | 1432 | 1.184 | <b>0.169</b>  |
| SP | TCCCCA | 2545.99 | 2968 | 1.166 | <b>0.153</b>  |
| SP | TCACCA | 1790.50 | 1869 | 1.044 | <b>0.043</b>  |
| SP | AGCCCT | 2988.71 | 3086 | 1.033 | <b>0.032</b>  |
| SP | AGTCCT | 1885.59 | 1904 | 1.010 | <b>0.010</b>  |
| SP | TCACCT | 1855.20 | 1752 | 0.944 | <b>-0.057</b> |
| SP | AGCCCA | 2884.48 | 2607 | 0.904 | <b>-0.101</b> |
| SP | TCCCCT | 2637.98 | 2238 | 0.848 | <b>-0.164</b> |
| SP | AGTCCA | 1819.84 | 1473 | 0.809 | <b>-0.211</b> |
| SP | TCGCCT | 697.59  | 562  | 0.806 | <b>-0.216</b> |
| SP | TCGCCA | 673.26  | 541  | 0.804 | <b>-0.219</b> |
| SP | TCTCCC | 2562.18 | 2036 | 0.795 | <b>-0.230</b> |
| SP | TCACCC | 2071.37 | 1568 | 0.757 | <b>-0.278</b> |
| SP | AGTCCC | 2105.31 | 1534 | 0.729 | <b>-0.317</b> |
| SP | TCTCCG | 928.37  | 664  | 0.715 | <b>-0.335</b> |
| SP | TCCCCC | 2945.37 | 2058 | 0.699 | <b>-0.358</b> |
| SP | TCACCG | 750.53  | 426  | 0.568 | <b>-0.566</b> |
| SP | AGTCCG | 762.83  | 319  | 0.418 | <b>-0.872</b> |
| SQ | TCCCAG | 4427.95 | 5592 | 1.263 | <b>0.233</b>  |
| SQ | AGCCAG | 5016.65 | 6041 | 1.204 | <b>0.186</b>  |
| SQ | TCTCAA | 1379.40 | 1644 | 1.192 | <b>0.175</b>  |
| SQ | AGTCAA | 1133.44 | 1293 | 1.141 | <b>0.132</b>  |
| SQ | TCACAA | 1115.16 | 1196 | 1.072 | <b>0.070</b>  |
| SQ | AGCCAA | 1796.52 | 1819 | 1.013 | <b>0.012</b>  |
| SQ | TCCCAA | 1585.70 | 1474 | 0.930 | <b>-0.073</b> |
| SQ | TCTCAG | 3851.88 | 3430 | 0.890 | <b>-0.116</b> |
| SQ | TCGCAG | 1170.92 | 1015 | 0.867 | <b>-0.143</b> |
| SQ | TCACAG | 3114.02 | 2271 | 0.729 | <b>-0.316</b> |
| SQ | AGTCAG | 3165.04 | 2215 | 0.700 | <b>-0.357</b> |
| SQ | TCGCAA | 419.32  | 186  | 0.444 | <b>-0.813</b> |
| SR | AGCCGC | 1540.23 | 2828 | 1.836 | <b>0.608</b>  |
| SR | TCCAGG | 1472.14 | 2309 | 1.568 | <b>0.450</b>  |



|    |        |         |      |       |               |
|----|--------|---------|------|-------|---------------|
| SR | AGCCGG | 1684.56 | 2353 | 1.397 | <b>0.334</b>  |
| SR | TCCCGG | 1486.87 | 1976 | 1.329 | <b>0.284</b>  |
| SR | AGCAGG | 1667.87 | 2186 | 1.311 | <b>0.271</b>  |
| SR | AGCCGT | 659.43  | 857  | 1.300 | <b>0.262</b>  |
| SR | TCGCGC | 359.50  | 446  | 1.241 | <b>0.216</b>  |
| SR | TCCAGA | 1499.54 | 1850 | 1.234 | <b>0.210</b>  |
| SR | TCAAGA | 1054.57 | 1294 | 1.227 | <b>0.205</b>  |
| SR | TCGCGG | 393.19  | 481  | 1.223 | <b>0.202</b>  |
| SR | TCCCGC | 1359.49 | 1605 | 1.181 | <b>0.166</b>  |
| SR | TCTCGA | 701.14  | 826  | 1.178 | <b>0.164</b>  |
| SR | AGTCGT | 416.04  | 484  | 1.163 | <b>0.151</b>  |
| SR | TCCCGA | 806.00  | 937  | 1.163 | <b>0.151</b>  |
| SR | AGCAGA | 1698.90 | 1925 | 1.133 | <b>0.125</b>  |
| SR | AGCCGA | 913.16  | 1020 | 1.117 | <b>0.111</b>  |
| SR | TCTCGT | 506.32  | 493  | 0.974 | <b>-0.027</b> |
| SR | AGTCGA | 576.12  | 553  | 0.960 | <b>-0.041</b> |
| SR | TCCCGT | 582.04  | 553  | 0.950 | <b>-0.051</b> |
| SR | TCAAGG | 1035.31 | 922  | 0.891 | <b>-0.116</b> |
| SR | TCGAGG | 389.29  | 324  | 0.832 | <b>-0.184</b> |
| SR | TCTCGG | 1293.43 | 1062 | 0.821 | <b>-0.197</b> |
| SR | TCACGT | 409.33  | 323  | 0.789 | <b>-0.237</b> |
| SR | AGTAGA | 1071.85 | 746  | 0.696 | <b>-0.362</b> |
| SR | TCGCGT | 153.92  | 102  | 0.663 | <b>-0.411</b> |
| SR | AGTCGG | 1062.80 | 675  | 0.635 | <b>-0.454</b> |
| SR | AGTCGC | 971.74  | 591  | 0.608 | <b>-0.497</b> |
| SR | TCACGA | 566.83  | 344  | 0.607 | <b>-0.499</b> |
| SR | TCGAGA | 396.54  | 240  | 0.605 | <b>-0.502</b> |
| SR | TCTAGA | 1304.45 | 750  | 0.575 | <b>-0.553</b> |
| SR | TCGCGA | 213.14  | 115  | 0.540 | <b>-0.617</b> |
| SR | TCTCGC | 1182.62 | 636  | 0.538 | <b>-0.620</b> |
| SR | TCACGG | 1045.66 | 534  | 0.511 | <b>-0.672</b> |
| SR | TCTAGG | 1280.62 | 574  | 0.448 | <b>-0.802</b> |
| SR | TCACGC | 956.08  | 406  | 0.425 | <b>-0.856</b> |
| SR | AGTAGG | 1052.27 | 443  | 0.421 | <b>-0.865</b> |
| SS | AGCAGC | 3919.72 | 7160 | 1.827 | <b>0.602</b>  |
| SS | TCGTCT | 213.54  | 376  | 1.761 | <b>0.566</b>  |
| SS | TCCTCG | 807.53  | 1302 | 1.612 | <b>0.478</b>  |
| SS | TCCAGC | 3459.74 | 4832 | 1.397 | <b>0.334</b>  |
| SS | TCTTCA | 1868.19 | 2596 | 1.390 | <b>0.329</b>  |
| SS | AGCAGT | 2472.97 | 3417 | 1.382 | <b>0.323</b>  |
| SS | TCCTCC | 3053.74 | 4162 | 1.363 | <b>0.310</b>  |
| SS | TCTTCT | 2310.85 | 2896 | 1.253 | <b>0.226</b>  |
| SS | TCCAGT | 2182.77 | 2691 | 1.233 | <b>0.209</b>  |
| SS | TCATCA | 1510.32 | 1795 | 1.188 | <b>0.173</b>  |
| SS | AGCTCC | 3459.74 | 4024 | 1.163 | <b>0.151</b>  |
| SS | TCATCT | 1868.19 | 2118 | 1.134 | <b>0.126</b>  |
| SS | TCCTCA | 2147.58 | 2413 | 1.124 | <b>0.117</b>  |
| SS | AGCTCG | 914.89  | 1001 | 1.094 | <b>0.090</b>  |
| SS | TCCTCT | 2656.45 | 2744 | 1.033 | <b>0.032</b>  |
| SS | TCGTCC | 807.53  | 818  | 1.013 | <b>0.013</b>  |
| SS | TCTTCC | 2656.45 | 2600 | 0.979 | <b>-0.021</b> |
| SS | AGTTCT | 1898.79 | 1856 | 0.977 | <b>-0.023</b> |
| SS | AGTTCA | 1535.06 | 1498 | 0.976 | <b>-0.024</b> |



|    |        |         |      |       |        |
|----|--------|---------|------|-------|--------|
| SS | TCAAGT | 1535.06 | 1404 | 0.915 | -0.089 |
| SS | AGCTCA | 2433.11 | 2075 | 0.853 | -0.159 |
| SS | AGCTCT | 3009.63 | 2465 | 0.819 | -0.200 |
| SS | TCTTCG | 702.47  | 556  | 0.791 | -0.234 |
| SS | TCATCC | 2147.58 | 1632 | 0.760 | -0.275 |
| SS | AGTAGT | 1560.21 | 1030 | 0.660 | -0.415 |
| SS | AGTTCC | 2182.77 | 1405 | 0.644 | -0.441 |
| SS | TCGTCT | 702.47  | 434  | 0.618 | -0.482 |
| SS | TCATCG | 567.91  | 343  | 0.604 | -0.504 |
| SS | TCGTCA | 567.91  | 313  | 0.551 | -0.596 |
| SS | TCTAGT | 1898.79 | 957  | 0.504 | -0.685 |
| SS | TCGAGC | 914.89  | 440  | 0.481 | -0.732 |
| SS | AGTAGC | 2472.97 | 1158 | 0.468 | -0.759 |
| SS | TCAAGC | 2433.11 | 1117 | 0.459 | -0.779 |
| SS | TCGAGT | 577.21  | 259  | 0.449 | -0.801 |
| SS | AGTTCG | 577.21  | 251  | 0.435 | -0.833 |
| SS | TCTAGC | 3009.63 | 899  | 0.299 | -1.208 |
| ST | TCCACG | 785.52  | 1434 | 1.826 | 0.602  |
| ST | AGCACC | 2709.18 | 4149 | 1.531 | 0.426  |
| ST | TCCACC | 2391.25 | 3527 | 1.475 | 0.389  |
| ST | AGCACG | 889.95  | 1180 | 1.326 | 0.282  |
| ST | AGCACA | 2193.18 | 2692 | 1.227 | 0.205  |
| ST | TCCACA | 1935.81 | 2329 | 1.203 | 0.185  |
| ST | TCCACT | 1711.89 | 1937 | 1.131 | 0.124  |
| ST | AGCACT | 1939.49 | 2193 | 1.131 | 0.123  |
| ST | TCAACA | 1361.39 | 1485 | 1.091 | 0.087  |
| ST | TCAACT | 1203.91 | 1270 | 1.055 | 0.053  |
| ST | TCTACT | 1489.18 | 1390 | 0.933 | -0.069 |
| ST | TCTACA | 1683.97 | 1461 | 0.868 | -0.142 |
| ST | AGTACT | 1223.64 | 1036 | 0.847 | -0.166 |
| ST | AGTACA | 1383.69 | 1061 | 0.767 | -0.266 |
| ST | TCGACG | 207.72  | 145  | 0.698 | -0.359 |
| ST | TCTACC | 2080.15 | 1218 | 0.586 | -0.535 |
| ST | TCGACC | 632.34  | 365  | 0.577 | -0.550 |
| ST | AGTACC | 1709.24 | 976  | 0.571 | -0.560 |
| ST | TCGACT | 452.69  | 240  | 0.530 | -0.635 |
| ST | TCAACC | 1681.68 | 873  | 0.519 | -0.656 |
| ST | TCAACG | 552.43  | 275  | 0.498 | -0.698 |
| ST | TCGACA | 511.90  | 236  | 0.461 | -0.774 |
| ST | TCTACG | 683.32  | 302  | 0.442 | -0.817 |
| ST | AGTACG | 561.48  | 201  | 0.358 | -1.027 |
| SV | TCGGTG | 935.47  | 1822 | 1.948 | 0.667  |
| SV | TCTGTA | 788.92  | 1398 | 1.772 | 0.572  |
| SV | TCTGTT | 1214.96 | 2136 | 1.758 | 0.564  |
| SV | TCAGTA | 637.79  | 1121 | 1.758 | 0.564  |
| SV | AGTGTT | 998.32  | 1719 | 1.722 | 0.543  |
| SV | TCAGTT | 982.23  | 1591 | 1.620 | 0.482  |
| SV | TCTGTC | 1555.54 | 2367 | 1.522 | 0.420  |
| SV | AGTGTC | 1278.17 | 1943 | 1.520 | 0.419  |
| SV | TCTGTG | 3077.33 | 4672 | 1.518 | 0.418  |
| SV | AGTGTA | 648.24  | 976  | 1.506 | 0.409  |
| SV | TCGGTC | 472.87  | 683  | 1.444 | 0.368  |
| SV | TCAGTG | 2487.84 | 2925 | 1.176 | 0.162  |

|    |        |         |      |       |               |
|----|--------|---------|------|-------|---------------|
| SV | AGTGTC | 2528.60 | 2901 | 1.147 | <b>0.137</b>  |
| SV | TCAGTC | 1257.56 | 1351 | 1.074 | <b>0.072</b>  |
| SV | TCGGTA | 239.82  | 231  | 0.963 | <b>-0.037</b> |
| SV | TCGGTT | 369.33  | 266  | 0.720 | <b>-0.328</b> |
| SV | AGCGTC | 2025.93 | 1298 | 0.641 | <b>-0.445</b> |
| SV | TCCGTG | 3537.57 | 2065 | 0.584 | <b>-0.538</b> |
| SV | AGCGTG | 4007.89 | 2221 | 0.554 | <b>-0.590</b> |
| SV | TCCGTC | 1788.18 | 829  | 0.464 | <b>-0.769</b> |
| SV | AGCGTT | 1582.36 | 446  | 0.282 | <b>-1.266</b> |
| SV | TCCGTA | 906.91  | 239  | 0.264 | <b>-1.334</b> |
| SV | TCCGTT | 1396.67 | 329  | 0.236 | <b>-1.446</b> |
| SV | AGCGTA | 1027.48 | 217  | 0.211 | <b>-1.555</b> |
| SW | TCCTGG | 1756.97 | 2825 | 1.608 | <b>0.475</b>  |
| SW | AGCTGG | 1990.56 | 2404 | 1.208 | <b>0.189</b>  |
| SW | TCGTGG | 464.61  | 444  | 0.956 | <b>-0.045</b> |
| SW | TCTTGG | 1528.39 | 1137 | 0.744 | <b>-0.296</b> |
| SW | TCATGG | 1235.61 | 778  | 0.630 | <b>-0.463</b> |
| SW | AGTTGG | 1255.86 | 644  | 0.513 | <b>-0.668</b> |
| SY | TCCTAC | 1871.53 | 3038 | 1.623 | <b>0.484</b>  |
| SY | AGCTAC | 2120.35 | 2864 | 1.351 | <b>0.301</b>  |
| SY | TCCTAT | 1520.75 | 1869 | 1.229 | <b>0.206</b>  |
| SY | AGCTAT | 1722.94 | 1609 | 0.934 | <b>-0.068</b> |
| SY | AGTTAT | 1087.01 | 1010 | 0.929 | <b>-0.073</b> |
| SY | AGTTAC | 1337.74 | 1153 | 0.862 | <b>-0.149</b> |
| SY | TCATAT | 1069.49 | 897  | 0.839 | <b>-0.176</b> |
| SY | TCTTAT | 1322.91 | 1100 | 0.832 | <b>-0.185</b> |
| SY | TCTTAC | 1628.04 | 1204 | 0.740 | <b>-0.302</b> |
| SY | TCGTAC | 494.91  | 304  | 0.614 | <b>-0.487</b> |
| SY | TCGTAT | 402.15  | 204  | 0.507 | <b>-0.679</b> |
| SY | TCATAC | 1316.18 | 642  | 0.488 | <b>-0.718</b> |
| TA | ACGGCG | 348.71  | 734  | 2.105 | <b>0.744</b>  |
| TA | ACAGCA | 1829.79 | 3283 | 1.794 | <b>0.585</b>  |
| TA | ACGGCC | 1289.71 | 2090 | 1.621 | <b>0.483</b>  |
| TA | ACTGCA | 1618.13 | 2557 | 1.580 | <b>0.458</b>  |
| TA | ACAGCT | 2090.24 | 3295 | 1.576 | <b>0.455</b>  |
| TA | ACTGCT | 1848.45 | 2764 | 1.495 | <b>0.402</b>  |
| TA | ACAGCC | 3178.34 | 3912 | 1.231 | <b>0.208</b>  |
| TA | ACGGCA | 742.49  | 804  | 1.083 | <b>0.080</b>  |
| TA | ACTGCC | 2810.69 | 3015 | 1.073 | <b>0.070</b>  |
| TA | ACGGCT | 848.18  | 804  | 0.948 | <b>-0.053</b> |
| TA | ACAGCG | 859.36  | 803  | 0.934 | <b>-0.068</b> |
| TA | ACTGCG | 759.96  | 623  | 0.820 | <b>-0.199</b> |
| TA | ACCGCG | 1061.55 | 584  | 0.550 | <b>-0.598</b> |
| TA | ACCGCC | 3926.11 | 1648 | 0.420 | <b>-0.868</b> |
| TA | ACCGCA | 2260.29 | 561  | 0.248 | <b>-1.394</b> |
| TA | ACCGCT | 2582.01 | 577  | 0.223 | <b>-1.498</b> |
| TC | ACCTGC | 1892.82 | 3247 | 1.715 | <b>0.540</b>  |
| TC | ACCTGT | 1594.30 | 1994 | 1.251 | <b>0.224</b>  |
| TC | ACGTGC | 621.78  | 691  | 1.111 | <b>0.106</b>  |
| TC | ACGTGT | 523.72  | 484  | 0.924 | <b>-0.079</b> |
| TC | ACTTGT | 1141.35 | 1033 | 0.905 | <b>-0.100</b> |
| TC | ACATGT | 1290.64 | 938  | 0.727 | <b>-0.319</b> |
| TC | ACTTGC | 1355.07 | 815  | 0.601 | <b>-0.508</b> |

|    |        |         |      |       |        |
|----|--------|---------|------|-------|--------|
| TC | ACATGC | 1532.31 | 750  | 0.489 | -0.714 |
| TD | ACAGAT | 2415.25 | 4195 | 1.737 | 0.552  |
| TD | ACAGAC | 2728.31 | 3765 | 1.380 | 0.322  |
| TD | ACTGAT | 2135.87 | 2913 | 1.364 | 0.310  |
| TD | ACGGAC | 1107.10 | 1446 | 1.306 | 0.267  |
| TD | ACTGAC | 2412.71 | 2615 | 1.084 | 0.081  |
| TD | ACGGAT | 980.07  | 922  | 0.941 | -0.061 |
| TD | ACCGAC | 3370.20 | 1547 | 0.459 | -0.779 |
| TD | ACCGAT | 2983.49 | 730  | 0.245 | -1.408 |
| TE | ACAGAA | 3127.33 | 5307 | 1.697 | 0.529  |
| TE | ACGGAG | 1697.07 | 2517 | 1.483 | 0.394  |
| TE | ACTGAA | 2765.58 | 4093 | 1.480 | 0.392  |
| TE | ACAGAG | 4182.23 | 5419 | 1.296 | 0.259  |
| TE | ACTGAG | 3698.46 | 4124 | 1.115 | 0.109  |
| TE | ACGGAA | 1269.01 | 1080 | 0.851 | -0.161 |
| TE | ACCGAG | 5166.20 | 2450 | 0.474 | -0.746 |
| TE | ACCGAA | 3863.10 | 779  | 0.202 | -1.601 |
| TF | ACCTTC | 3026.54 | 4955 | 1.637 | 0.493  |
| TF | ACATTT | 2140.61 | 2275 | 1.063 | 0.061  |
| TF | ACTTTT | 1893.00 | 1904 | 1.006 | 0.006  |
| TF | ACCTTT | 2644.23 | 2518 | 0.952 | -0.049 |
| TF | ACTTTC | 2166.69 | 1822 | 0.841 | -0.173 |
| TF | ACGTTT | 868.62  | 650  | 0.748 | -0.290 |
| TF | ACGTTC | 994.21  | 666  | 0.670 | -0.401 |
| TF | ACATTC | 2450.10 | 1394 | 0.569 | -0.564 |
| TG | ACTGGA | 1710.74 | 3660 | 2.139 | 0.761  |
| TG | ACTGGT | 1107.57 | 1887 | 1.704 | 0.533  |
| TG | ACAGGA | 1934.51 | 2970 | 1.535 | 0.429  |
| TG | ACGGGC | 1064.34 | 1583 | 1.487 | 0.397  |
| TG | ACTGGG | 1670.12 | 2322 | 1.390 | 0.330  |
| TG | ACGGGG | 766.35  | 1049 | 1.369 | 0.314  |
| TG | ACAGGT | 1252.44 | 1694 | 1.353 | 0.302  |
| TG | ACAGGG | 1888.57 | 2148 | 1.137 | 0.129  |
| TG | ACTGGC | 2319.53 | 2620 | 1.130 | 0.122  |
| TG | ACAGGC | 2622.93 | 2664 | 1.016 | 0.016  |
| TG | ACGGGT | 508.22  | 484  | 0.952 | -0.049 |
| TG | ACGGGA | 784.99  | 710  | 0.904 | -0.100 |
| TG | ACCGGG | 2332.90 | 1093 | 0.469 | -0.758 |
| TG | ACCGGC | 3240.03 | 1373 | 0.424 | -0.859 |
| TG | ACCGGT | 1547.11 | 355  | 0.229 | -1.472 |
| TG | ACCGGA | 2389.65 | 528  | 0.221 | -1.510 |
| TH | ACTCAT | 1054.95 | 1291 | 1.224 | 0.202  |
| TH | ACCCAC | 2032.09 | 2408 | 1.185 | 0.170  |
| TH | ACGCAC | 667.53  | 764  | 1.145 | 0.135  |
| TH | ACACAT | 1192.94 | 1186 | 0.994 | -0.006 |
| TH | ACTCAC | 1454.76 | 1384 | 0.951 | -0.050 |
| TH | ACCCAT | 1473.60 | 1287 | 0.873 | -0.135 |
| TH | ACACAC | 1645.05 | 1383 | 0.841 | -0.174 |
| TH | ACGCAT | 484.07  | 302  | 0.624 | -0.472 |
| TI | ACCATC | 2842.70 | 5915 | 2.081 | 0.733  |
| TI | ACCATT | 2247.97 | 2878 | 1.280 | 0.247  |
| TI | ACAATA | 836.96  | 980  | 1.171 | 0.158  |
| TI | ACCATA | 1033.87 | 1137 | 1.100 | 0.095  |

|    |        |         |      |       |        |
|----|--------|---------|------|-------|--------|
| TI | ACAATT | 1819.82 | 1579 | 0.868 | -0.142 |
| TI | ACTATA | 740.14  | 642  | 0.867 | -0.142 |
| TI | ACTATT | 1609.31 | 1337 | 0.831 | -0.185 |
| TI | ACGATA | 339.62  | 190  | 0.559 | -0.581 |
| TI | ACGATT | 738.45  | 389  | 0.527 | -0.641 |
| TI | ACGATC | 933.81  | 463  | 0.496 | -0.702 |
| TI | ACTATC | 2035.08 | 942  | 0.463 | -0.770 |
| TI | ACAATC | 2301.27 | 1027 | 0.446 | -0.807 |
| TK | ACCAAG | 3878.56 | 6678 | 1.722 | 0.543  |
| TK | ACCAAA | 2994.77 | 3789 | 1.265 | 0.235  |
| TK | ACAAAA | 2424.38 | 2546 | 1.050 | 0.049  |
| TK | ACAAAG | 3139.84 | 2507 | 0.798 | -0.225 |
| TK | ACTAAA | 2143.95 | 1684 | 0.785 | -0.241 |
| TK | ACGAAG | 1274.09 | 708  | 0.556 | -0.588 |
| TK | ACGAAA | 983.77  | 511  | 0.519 | -0.655 |
| TK | ACTAAG | 2776.65 | 1193 | 0.430 | -0.845 |
| TL | ACGCTG | 1815.48 | 3357 | 1.849 | 0.615  |
| TL | ACTTTA | 765.72  | 1207 | 1.576 | 0.455  |
| TL | ACTTTG | 1286.34 | 1876 | 1.458 | 0.377  |
| TL | ACATTA | 865.87  | 1115 | 1.288 | 0.253  |
| TL | ACCTTG | 1796.82 | 2257 | 1.256 | 0.228  |
| TL | ACTCTA | 707.99  | 876  | 1.237 | 0.213  |
| TL | ACGCTC | 873.61  | 1057 | 1.210 | 0.191  |
| TL | ACCCTC | 2659.44 | 3133 | 1.178 | 0.164  |
| TL | ACCCTG | 5526.65 | 6354 | 1.150 | 0.140  |
| TL | ACTCTT | 1312.81 | 1469 | 1.119 | 0.112  |
| TL | ACACTA | 800.60  | 799  | 0.998 | -0.002 |
| TL | ACGCTA | 324.87  | 307  | 0.945 | -0.057 |
| TL | ACCTTA | 1069.59 | 957  | 0.895 | -0.111 |
| TL | ACACTT | 1484.53 | 1316 | 0.886 | -0.121 |
| TL | ACGTTG | 590.25  | 505  | 0.856 | -0.156 |
| TL | ACATTG | 1454.60 | 1210 | 0.832 | -0.184 |
| TL | ACCCTT | 1833.80 | 1515 | 0.826 | -0.191 |
| TL | ACCCTA | 988.95  | 802  | 0.811 | -0.210 |
| TL | ACTCTG | 3956.51 | 3120 | 0.789 | -0.238 |
| TL | ACGTTA | 351.36  | 262  | 0.746 | -0.293 |
| TL | ACTCTC | 1903.88 | 1391 | 0.731 | -0.314 |
| TL | ACGCTT | 602.39  | 427  | 0.709 | -0.344 |
| TL | ACACTG | 4474.03 | 3013 | 0.673 | -0.395 |
| TL | ACACTC | 2152.92 | 1274 | 0.592 | -0.525 |
| TM | ACCATG | 2733.42 | 4467 | 1.634 | 0.491  |
| TM | ACAATG | 2212.81 | 1641 | 0.742 | -0.299 |
| TM | ACGATG | 897.92  | 655  | 0.729 | -0.315 |
| TM | ACTATG | 1956.85 | 1038 | 0.530 | -0.634 |
| TN | ACCAAC | 2378.62 | 4300 | 1.808 | 0.592  |
| TN | ACAAAT | 1748.34 | 2194 | 1.255 | 0.227  |
| TN | ACCAAT | 2159.68 | 2454 | 1.136 | 0.128  |
| TN | ACAAAC | 1925.59 | 1486 | 0.772 | -0.259 |
| TN | ACTAAT | 1546.11 | 1077 | 0.697 | -0.362 |
| TN | ACGAAT | 709.45  | 336  | 0.474 | -0.747 |
| TN | ACTAAC | 1702.85 | 789  | 0.463 | -0.769 |
| TN | ACGAAC | 781.37  | 316  | 0.404 | -0.905 |
| TP | ACGCCG | 349.03  | 632  | 1.811 | 0.594  |

|    |        |         |      |       |               |
|----|--------|---------|------|-------|---------------|
| TP | ACGCCC | 963.29  | 1491 | 1.548 | <b>0.437</b>  |
| TP | ACTCCA | 1814.66 | 2359 | 1.300 | <b>0.262</b>  |
| TP | ACCCCG | 1062.52 | 1331 | 1.253 | <b>0.225</b>  |
| TP | ACTCCT | 1880.23 | 2186 | 1.163 | <b>0.151</b>  |
| TP | ACACCA | 2052.02 | 2361 | 1.151 | <b>0.140</b>  |
| TP | ACCCCA | 2534.80 | 2784 | 1.098 | <b>0.094</b>  |
| TP | ACACCT | 2126.17 | 2104 | 0.990 | <b>-0.010</b> |
| TP | ACCCCT | 2626.39 | 2415 | 0.920 | <b>-0.084</b> |
| TP | ACGCCA | 832.67  | 748  | 0.898 | <b>-0.107</b> |
| TP | ACCCCC | 2932.43 | 2380 | 0.812 | <b>-0.209</b> |
| TP | ACACCC | 2373.91 | 1922 | 0.810 | <b>-0.211</b> |
| TP | ACGCCT | 862.76  | 697  | 0.808 | <b>-0.213</b> |
| TP | ACTCCC | 2099.31 | 1649 | 0.785 | <b>-0.241</b> |
| TP | ACTCCG | 760.66  | 538  | 0.707 | <b>-0.346</b> |
| TP | ACACCG | 860.15  | 534  | 0.621 | <b>-0.477</b> |
| TQ | ACTCAA | 1103.35 | 1368 | 1.240 | <b>0.215</b>  |
| TQ | ACCCAG | 4303.71 | 5173 | 1.202 | <b>0.184</b>  |
| TQ | ACGCAG | 1413.75 | 1518 | 1.074 | <b>0.071</b>  |
| TQ | ACACAA | 1247.67 | 1328 | 1.064 | <b>0.062</b>  |
| TQ | ACTCAG | 3081.01 | 2839 | 0.921 | <b>-0.082</b> |
| TQ | ACCCAA | 1541.21 | 1410 | 0.915 | <b>-0.089</b> |
| TQ | ACACAG | 3484.02 | 2765 | 0.794 | <b>-0.231</b> |
| TQ | ACGCAA | 506.28  | 280  | 0.553 | <b>-0.592</b> |
| TR | ACCAGG | 1331.08 | 2049 | 1.539 | <b>0.431</b>  |
| TR | ACGCGC | 403.79  | 605  | 1.498 | <b>0.404</b>  |
| TR | ACGCGG | 441.63  | 661  | 1.497 | <b>0.403</b>  |
| TR | ACTCGA | 521.72  | 717  | 1.374 | <b>0.318</b>  |
| TR | ACAAGA | 1097.61 | 1429 | 1.302 | <b>0.264</b>  |
| TR | ACCCGC | 1229.22 | 1547 | 1.259 | <b>0.230</b>  |
| TR | ACCCGG | 1344.40 | 1668 | 1.241 | <b>0.216</b>  |
| TR | ACTCGT | 376.76  | 448  | 1.189 | <b>0.173</b>  |
| TR | ACCAGA | 1355.85 | 1599 | 1.179 | <b>0.165</b>  |
| TR | ACCCGA | 728.77  | 758  | 1.040 | <b>0.039</b>  |
| TR | ACCCGT | 526.27  | 535  | 1.017 | <b>0.016</b>  |
| TR | ACAAGG | 1077.56 | 1072 | 0.995 | <b>-0.005</b> |
| TR | ACGAGG | 437.25  | 433  | 0.990 | <b>-0.010</b> |
| TR | ACTCGG | 962.45  | 823  | 0.855 | <b>-0.157</b> |
| TR | ACGCGT | 172.88  | 141  | 0.816 | <b>-0.204</b> |
| TR | ACACGT | 426.04  | 329  | 0.772 | <b>-0.258</b> |
| TR | ACGAGA | 445.39  | 331  | 0.743 | <b>-0.297</b> |
| TR | ACACGA | 589.97  | 432  | 0.732 | <b>-0.312</b> |
| TR | ACACGG | 1088.34 | 756  | 0.695 | <b>-0.364</b> |
| TR | ACTCGC | 879.99  | 607  | 0.690 | <b>-0.371</b> |
| TR | ACTAGA | 970.65  | 624  | 0.643 | <b>-0.442</b> |
| TR | ACGCGA | 239.40  | 150  | 0.627 | <b>-0.468</b> |
| TR | ACACGC | 995.10  | 498  | 0.500 | <b>-0.692</b> |
| TR | ACTAGG | 952.91  | 383  | 0.402 | <b>-0.911</b> |
| TS | ACCAGC | 2807.29 | 4575 | 1.630 | <b>0.488</b>  |
| TS | ACCTCG | 655.24  | 1060 | 1.618 | <b>0.481</b>  |
| TS | ACGTCT | 215.24  | 348  | 1.617 | <b>0.480</b>  |
| TS | ACTTCA | 1247.51 | 1844 | 1.478 | <b>0.391</b>  |
| TS | ACTTCT | 1543.11 | 1974 | 1.279 | <b>0.246</b>  |
| TS | ACATCA | 1410.69 | 1754 | 1.243 | <b>0.218</b>  |

|    |        |         |      |       |               |
|----|--------|---------|------|-------|---------------|
| TS | ACCAGT | 1771.14 | 2194 | 1.239 | <b>0.214</b>  |
| TS | ACCTCC | 2477.85 | 3050 | 1.231 | <b>0.208</b>  |
| TS | ACCTCA | 1742.59 | 1938 | 1.112 | <b>0.106</b>  |
| TS | ACATCT | 1744.95 | 1911 | 1.095 | <b>0.091</b>  |
| TS | ACGTCC | 813.96  | 840  | 1.032 | <b>0.031</b>  |
| TS | ACCTCT | 2155.49 | 2072 | 0.961 | <b>-0.040</b> |
| TS | ACAAGT | 1433.80 | 1335 | 0.931 | <b>-0.071</b> |
| TS | ACTTCC | 1773.89 | 1524 | 0.859 | <b>-0.152</b> |
| TS | ACGTCA | 572.43  | 450  | 0.786 | <b>-0.241</b> |
| TS | ACATCC | 2005.92 | 1570 | 0.783 | <b>-0.245</b> |
| TS | ACTTCG | 469.09  | 353  | 0.753 | <b>-0.284</b> |
| TS | ACGTCT | 708.07  | 527  | 0.744 | <b>-0.295</b> |
| TS | ACATCG | 530.44  | 361  | 0.681 | <b>-0.385</b> |
| TS | ACTAGT | 1267.95 | 725  | 0.572 | <b>-0.559</b> |
| TS | ACAAGC | 2272.61 | 1275 | 0.561 | <b>-0.578</b> |
| TS | ACGAGT | 581.81  | 297  | 0.510 | <b>-0.672</b> |
| TS | ACGAGC | 922.18  | 469  | 0.509 | <b>-0.676</b> |
| TS | ACTAGC | 2009.73 | 687  | 0.342 | <b>-1.073</b> |
| TT | ACCACG | 875.88  | 1567 | 1.789 | <b>0.582</b>  |
| TT | ACCACC | 2666.32 | 4767 | 1.788 | <b>0.581</b>  |
| TT | ACCACA | 2158.49 | 2882 | 1.335 | <b>0.289</b>  |
| TT | ACCACT | 1908.81 | 2309 | 1.210 | <b>0.190</b>  |
| TT | ACAACA | 1747.38 | 1793 | 1.026 | <b>0.026</b>  |
| TT | ACAACT | 1545.26 | 1567 | 1.014 | <b>0.014</b>  |
| TT | ACGACG | 287.72  | 252  | 0.876 | <b>-0.133</b> |
| TT | ACTACT | 1366.51 | 1065 | 0.779 | <b>-0.249</b> |
| TT | ACTACA | 1545.26 | 1196 | 0.774 | <b>-0.256</b> |
| TT | ACGACC | 875.88  | 575  | 0.656 | <b>-0.421</b> |
| TT | ACGACA | 709.06  | 437  | 0.616 | <b>-0.484</b> |
| TT | ACAACC | 2158.49 | 1310 | 0.607 | <b>-0.499</b> |
| TT | ACGACT | 627.04  | 357  | 0.569 | <b>-0.563</b> |
| TT | ACTACC | 1908.81 | 992  | 0.520 | <b>-0.655</b> |
| TT | ACAACG | 709.06  | 365  | 0.515 | <b>-0.664</b> |
| TT | ACTACG | 627.04  | 283  | 0.451 | <b>-0.796</b> |
| TV | ACTGTA | 845.20  | 1425 | 1.686 | <b>0.522</b>  |
| TV | ACTGTT | 1301.64 | 2058 | 1.581 | <b>0.458</b>  |
| TV | ACGGTG | 1512.80 | 2306 | 1.524 | <b>0.422</b>  |
| TV | ACAGTA | 955.76  | 1371 | 1.434 | <b>0.361</b>  |
| TV | ACTGTC | 1666.51 | 2289 | 1.374 | <b>0.317</b>  |
| TV | ACAGTT | 1471.90 | 2019 | 1.372 | <b>0.316</b>  |
| TV | ACTGTG | 3296.87 | 4505 | 1.366 | <b>0.312</b>  |
| TV | ACGGTC | 764.70  | 911  | 1.191 | <b>0.175</b>  |
| TV | ACAGTG | 3728.11 | 4108 | 1.102 | <b>0.097</b>  |
| TV | ACAGTC | 1884.50 | 1933 | 1.026 | <b>0.025</b>  |
| TV | ACGGTA | 387.83  | 286  | 0.737 | <b>-0.305</b> |
| TV | ACGGTT | 597.27  | 415  | 0.695 | <b>-0.364</b> |
| TV | ACCGTG | 4605.23 | 2640 | 0.573 | <b>-0.556</b> |
| TV | ACCGTC | 2327.87 | 1285 | 0.552 | <b>-0.594</b> |
| TV | ACCGTT | 1818.19 | 496  | 0.273 | <b>-1.299</b> |
| TV | ACCGTA | 1180.62 | 298  | 0.252 | <b>-1.377</b> |
| TW | ACGTGG | 606.25  | 837  | 1.381 | <b>0.323</b>  |
| TW | ACCTGG | 1845.52 | 2403 | 1.302 | <b>0.264</b>  |
| TW | ACATGG | 1494.02 | 1089 | 0.729 | <b>-0.316</b> |

|    |        |         |       |       |               |
|----|--------|---------|-------|-------|---------------|
| TW | ACTTGG | 1321.21 | 938   | 0.710 | <b>-0.343</b> |
| TY | ACCTAC | 2130.11 | 3648  | 1.713 | <b>0.538</b>  |
| TY | ACCTAT | 1730.88 | 1778  | 1.027 | <b>0.027</b>  |
| TY | ACTTAC | 1524.94 | 1383  | 0.907 | <b>-0.098</b> |
| TY | ACGTAC | 699.73  | 621   | 0.887 | <b>-0.119</b> |
| TY | ACATAT | 1401.21 | 1136  | 0.811 | <b>-0.210</b> |
| TY | ACTTAT | 1239.13 | 907   | 0.732 | <b>-0.312</b> |
| TY | ACGTAT | 568.59  | 408   | 0.718 | <b>-0.332</b> |
| TY | ACATAC | 1724.41 | 1138  | 0.660 | <b>-0.416</b> |
| VA | GTGGCC | 6082.92 | 9316  | 1.532 | <b>0.426</b>  |
| VA | GTAGCA | 897.78  | 1347  | 1.500 | <b>0.406</b>  |
| VA | GTTGCT | 1579.41 | 2217  | 1.404 | <b>0.339</b>  |
| VA | GTAGCT | 1025.57 | 1407  | 1.372 | <b>0.316</b>  |
| VA | GTGGCT | 4000.44 | 5252  | 1.313 | <b>0.272</b>  |
| VA | GTGGCG | 1644.71 | 2099  | 1.276 | <b>0.244</b>  |
| VA | GTTGCA | 1382.62 | 1728  | 1.250 | <b>0.223</b>  |
| VA | GTGGCA | 3501.98 | 3859  | 1.102 | <b>0.097</b>  |
| VA | GTAGCC | 1559.44 | 1363  | 0.874 | <b>-0.135</b> |
| VA | GTTGCC | 2401.60 | 1808  | 0.753 | <b>-0.284</b> |
| VA | GTAGCG | 421.64  | 216   | 0.512 | <b>-0.669</b> |
| VA | GTTGCG | 649.35  | 234   | 0.360 | <b>-1.021</b> |
| VA | GTCGCG | 831.37  | 284   | 0.342 | <b>-1.074</b> |
| VA | GTCGCC | 3074.82 | 992   | 0.323 | <b>-1.131</b> |
| VA | GTCGCT | 2022.16 | 406   | 0.201 | <b>-1.606</b> |
| VA | GTCGCA | 1770.19 | 318   | 0.180 | <b>-1.717</b> |
| VC | GTCTGC | 1410.66 | 2160  | 1.531 | <b>0.426</b>  |
| VC | GTCTGT | 1188.18 | 1572  | 1.323 | <b>0.280</b>  |
| VC | GTTTGT | 928.03  | 942   | 1.015 | <b>0.015</b>  |
| VC | GTATGT | 602.60  | 594   | 0.986 | <b>-0.014</b> |
| VC | GTGTGC | 2790.71 | 2583  | 0.926 | <b>-0.077</b> |
| VC | GTGTGT | 2350.57 | 1996  | 0.849 | <b>-0.164</b> |
| VC | GTTTGC | 1101.80 | 830   | 0.753 | <b>-0.283</b> |
| VC | GTATGC | 715.44  | 411   | 0.574 | <b>-0.554</b> |
| VD | GTAGAT | 1225.65 | 1924  | 1.570 | <b>0.451</b>  |
| VD | GTGGAC | 5400.58 | 7734  | 1.432 | <b>0.359</b>  |
| VD | GTTGAT | 1887.55 | 2389  | 1.266 | <b>0.236</b>  |
| VD | GTGGAT | 4780.91 | 5727  | 1.198 | <b>0.181</b>  |
| VD | GTAGAC | 1384.52 | 1346  | 0.972 | <b>-0.028</b> |
| VD | GTTGAC | 2132.21 | 1791  | 0.840 | <b>-0.174</b> |
| VD | GTCGAC | 2729.91 | 602   | 0.221 | <b>-1.512</b> |
| VD | GTCGAT | 2416.67 | 445   | 0.184 | <b>-1.692</b> |
| VE | GTAGAA | 1456.83 | 2855  | 1.960 | <b>0.673</b>  |
| VE | GTGGAG | 7599.48 | 11579 | 1.524 | <b>0.421</b>  |
| VE | GTTGAA | 2243.56 | 2905  | 1.295 | <b>0.258</b>  |
| VE | GTGGAA | 5682.64 | 6229  | 1.096 | <b>0.092</b>  |
| VE | GTAGAG | 1948.24 | 2002  | 1.028 | <b>0.027</b>  |
| VE | GTTGAG | 3000.36 | 1987  | 0.662 | <b>-0.412</b> |
| VE | GTCGAG | 3841.42 | 721   | 0.188 | <b>-1.673</b> |
| VE | GTCGAA | 2872.48 | 367   | 0.128 | <b>-2.058</b> |
| VF | GTCTTC | 2309.08 | 4216  | 1.826 | <b>0.602</b>  |
| VF | GTATTT | 1023.16 | 1512  | 1.478 | <b>0.391</b>  |
| VF | GTCTTT | 2017.40 | 2238  | 1.109 | <b>0.104</b>  |
| VF | GTTTTT | 1575.70 | 1706  | 1.083 | <b>0.079</b>  |



|    |         |         |      |       |        |
|----|---------|---------|------|-------|--------|
| VF | GTTTTTC | 1803.52 | 1604 | 0.889 | -0.117 |
| VF | GTGTTT  | 3991.02 | 3257 | 0.816 | -0.203 |
| VF | GTGTTC  | 4568.05 | 3205 | 0.702 | -0.354 |
| VF | GTATTC  | 1171.09 | 721  | 0.616 | -0.485 |
| VG | GTTGGT  | 779.74  | 1617 | 2.074 | 0.729  |
| VG | GTTGGA  | 1204.37 | 2315 | 1.922 | 0.653  |
| VG | GTGGGC  | 4136.07 | 5977 | 1.445 | 0.368  |
| VG | GTAGGA  | 782.04  | 1089 | 1.393 | 0.331  |
| VG | GTTGGG  | 1175.77 | 1510 | 1.284 | 0.250  |
| VG | GTTGGC  | 1632.96 | 1794 | 1.099 | 0.094  |
| VG | GTAGGT  | 506.31  | 554  | 1.094 | 0.090  |
| VG | GTGGGG  | 2978.07 | 3255 | 1.093 | 0.089  |
| VG | GTGGGT  | 1974.96 | 2009 | 1.017 | 0.017  |
| VG | GTAGGG  | 763.47  | 683  | 0.895 | -0.111 |
| VG | GTGGGA  | 3050.51 | 2599 | 0.852 | -0.160 |
| VG | GTAGGC  | 1060.34 | 676  | 0.638 | -0.450 |
| VG | GTCGGG  | 1505.36 | 734  | 0.488 | -0.718 |
| VG | GTCGGC  | 2090.72 | 734  | 0.351 | -1.047 |
| VG | GTCGGT  | 998.31  | 292  | 0.292 | -1.229 |
| VG | GTCGGA  | 1541.98 | 343  | 0.222 | -1.503 |
| VH | GTTCAT  | 911.79  | 1418 | 1.555 | 0.442  |
| VH | GTACAT  | 592.06  | 773  | 1.306 | 0.267  |
| VH | GTCCAC  | 1609.82 | 2085 | 1.295 | 0.259  |
| VH | GTCCAT  | 1167.39 | 1313 | 1.125 | 0.118  |
| VH | GTTCAC  | 1257.35 | 1319 | 1.049 | 0.048  |
| VH | GTGCAC  | 3184.70 | 2856 | 0.897 | -0.109 |
| VH | GTACAC  | 816.44  | 613  | 0.751 | -0.287 |
| VH | GTGCAT  | 2309.44 | 1472 | 0.637 | -0.450 |
| VI | GTCATC  | 2367.78 | 5207 | 2.199 | 0.788  |
| VI | GTCATT  | 1872.41 | 2827 | 1.510 | 0.412  |
| VI | GTAATA  | 436.74  | 614  | 1.406 | 0.341  |
| VI | GTAATT  | 949.63  | 1074 | 1.131 | 0.123  |
| VI | GTTATT  | 1462.46 | 1595 | 1.091 | 0.087  |
| VI | GTCATA  | 861.15  | 904  | 1.050 | 0.049  |
| VI | GTTATA  | 672.60  | 702  | 1.044 | 0.043  |
| VI | GTGATT  | 3704.20 | 2742 | 0.740 | -0.301 |
| VI | GTGATC  | 4684.19 | 3353 | 0.716 | -0.334 |
| VI | GTGATA  | 1703.61 | 1117 | 0.656 | -0.422 |
| VI | GTTATC  | 1849.37 | 1053 | 0.569 | -0.563 |
| VI | GTAATC  | 1200.86 | 577  | 0.480 | -0.733 |
| VK | GTAAAA  | 1288.46 | 1945 | 1.510 | 0.412  |
| VK | GTCAAG  | 3290.24 | 3982 | 1.210 | 0.191  |
| VK | GTGAAG  | 6509.08 | 7513 | 1.154 | 0.143  |
| VK | GTAAAG  | 1668.70 | 1704 | 1.021 | 0.021  |
| VK | GTCAAA  | 2540.51 | 2376 | 0.935 | -0.067 |
| VK | GTTAAA  | 1984.27 | 1777 | 0.896 | -0.110 |
| VK | GTGAAA  | 5025.89 | 4409 | 0.877 | -0.131 |
| VK | GTTAAG  | 2569.85 | 1171 | 0.456 | -0.786 |
| VL | GTTTTA  | 668.83  | 1311 | 1.960 | 0.673  |
| VL | GTTCTT  | 1146.70 | 1859 | 1.621 | 0.483  |
| VL | GTTTTG  | 1123.58 | 1737 | 1.546 | 0.436  |
| VL | GTATTA  | 434.30  | 646  | 1.487 | 0.397  |
| VL | GTCCTC  | 2129.16 | 3019 | 1.418 | 0.349  |



|    |         |         |       |       |               |
|----|---------|---------|-------|-------|---------------|
| VL | GTTCTA  | 618.41  | 832   | 1.345 | <b>0.297</b>  |
| VL | GTCCTG  | 4424.65 | 5574  | 1.260 | <b>0.231</b>  |
| VL | GTCCTT  | 1468.14 | 1722  | 1.173 | <b>0.159</b>  |
| VL | GTGCTG  | 8753.31 | 10107 | 1.155 | <b>0.144</b>  |
| VL | GTCTTG  | 1438.54 | 1628  | 1.132 | <b>0.124</b>  |
| VL | GTACTA  | 401.55  | 447   | 1.113 | <b>0.107</b>  |
| VL | GTCCTA  | 791.76  | 874   | 1.104 | <b>0.099</b>  |
| VL | GTCTTA  | 856.32  | 863   | 1.008 | <b>0.008</b>  |
| VL | GTATTG  | 729.58  | 711   | 0.975 | <b>-0.026</b> |
| VL | GTACTT  | 744.59  | 693   | 0.931 | <b>-0.072</b> |
| VL | GTTCTC  | 1662.99 | 1501  | 0.903 | <b>-0.102</b> |
| VL | GTGCTC  | 4212.12 | 3765  | 0.894 | <b>-0.112</b> |
| VL | GTGCTA  | 1566.34 | 1286  | 0.821 | <b>-0.197</b> |
| VL | GTTCTG  | 3455.90 | 2350  | 0.680 | <b>-0.386</b> |
| VL | GTGTTG  | 2845.87 | 1910  | 0.671 | <b>-0.399</b> |
| VL | GTGCTT  | 2904.43 | 1933  | 0.666 | <b>-0.407</b> |
| VL | GTGTTA  | 1694.06 | 965   | 0.570 | <b>-0.563</b> |
| VL | GTACTC  | 1079.84 | 541   | 0.501 | <b>-0.691</b> |
| VL | GTACTG  | 2244.04 | 1121  | 0.500 | <b>-0.694</b> |
| VM | GTCATG  | 2149.52 | 3308  | 1.539 | <b>0.431</b>  |
| VM | GTGATG  | 4252.41 | 3872  | 0.911 | <b>-0.094</b> |
| VM | GTAATG  | 1090.17 | 935   | 0.858 | <b>-0.154</b> |
| VM | GTTATG  | 1678.90 | 1056  | 0.629 | <b>-0.464</b> |
| VN | GTCAAC  | 2052.00 | 3311  | 1.614 | <b>0.478</b>  |
| VN | GTAAAT  | 944.92  | 1518  | 1.606 | <b>0.474</b>  |
| VN | GTCAAT  | 1863.13 | 2155  | 1.157 | <b>0.146</b>  |
| VN | GTTAAT  | 1455.20 | 1325  | 0.911 | <b>-0.094</b> |
| VN | GTGAAC  | 4059.49 | 3551  | 0.875 | <b>-0.134</b> |
| VN | GTGAAT  | 3685.83 | 3110  | 0.844 | <b>-0.170</b> |
| VN | GTAAAC  | 1040.71 | 854   | 0.821 | <b>-0.198</b> |
| VN | GTTAAC  | 1602.73 | 880   | 0.549 | <b>-0.600</b> |
| VP | GTTCCCT | 1434.04 | 2257  | 1.574 | <b>0.454</b>  |
| VP | GTTCCA  | 1384.03 | 1911  | 1.381 | <b>0.323</b>  |
| VP | GTGCCC  | 4055.45 | 4998  | 1.232 | <b>0.209</b>  |
| VP | GTACCT  | 931.17  | 1048  | 1.125 | <b>0.118</b>  |
| VP | GTCCCC  | 2049.96 | 2260  | 1.102 | <b>0.098</b>  |
| VP | GTCCCT  | 1836.02 | 2014  | 1.097 | <b>0.093</b>  |
| VP | GTACCA  | 898.70  | 963   | 1.072 | <b>0.069</b>  |
| VP | GTCCCG  | 742.77  | 786   | 1.058 | <b>0.057</b>  |
| VP | GTTCCC  | 1601.13 | 1506  | 0.941 | <b>-0.061</b> |
| VP | GTCCCA  | 1772.00 | 1596  | 0.901 | <b>-0.105</b> |
| VP | GTGCCT  | 3632.21 | 3062  | 0.843 | <b>-0.171</b> |
| VP | GTGCCG  | 1469.43 | 1228  | 0.836 | <b>-0.179</b> |
| VP | GTACCC  | 1039.67 | 809   | 0.778 | <b>-0.251</b> |
| VP | GTGCCA  | 3505.55 | 2431  | 0.693 | <b>-0.366</b> |
| VP | GTTCCG  | 580.15  | 279   | 0.481 | <b>-0.732</b> |
| VP | GTACCG  | 376.71  | 161   | 0.427 | <b>-0.850</b> |
| VQ | GTACAA  | 633.37  | 1049  | 1.656 | <b>0.505</b>  |
| VQ | GTTCAA  | 975.42  | 1485  | 1.522 | <b>0.420</b>  |
| VQ | GTCCAG  | 3487.32 | 3907  | 1.120 | <b>0.114</b>  |
| VQ | GTACAG  | 1768.65 | 1752  | 0.991 | <b>-0.009</b> |
| VQ | GTTCAG  | 2723.79 | 2689  | 0.987 | <b>-0.013</b> |
| VQ | GTGCAG  | 6898.98 | 6734  | 0.976 | <b>-0.024</b> |

|    |        |         |      |       |        |
|----|--------|---------|------|-------|--------|
| VQ | GTCCAA | 1248.85 | 1067 | 0.854 | -0.157 |
| VQ | GTGCAA | 2470.60 | 1524 | 0.617 | -0.483 |
| VR | GTTCGA | 463.33  | 867  | 1.871 | 0.627  |
| VR | GTTCGT | 334.59  | 580  | 1.733 | 0.550  |
| VR | GTCCGA | 593.21  | 805  | 1.357 | 0.305  |
| VR | GTCCGC | 1000.57 | 1332 | 1.331 | 0.286  |
| VR | GTGCGC | 1979.43 | 2543 | 1.285 | 0.251  |
| VR | GTCCGT | 428.38  | 549  | 1.282 | 0.248  |
| VR | GTCCGG | 1094.32 | 1346 | 1.230 | 0.207  |
| VR | GTACGA | 300.86  | 361  | 1.200 | 0.182  |
| VR | GTAAGA | 559.73  | 660  | 1.179 | 0.165  |
| VR | GTGCGG | 2164.91 | 2552 | 1.179 | 0.164  |
| VR | GTCAGA | 1103.65 | 1291 | 1.170 | 0.157  |
| VR | GTACGT | 217.26  | 253  | 1.165 | 0.152  |
| VR | GTCAGG | 1083.48 | 1238 | 1.143 | 0.133  |
| VR | GTGAGG | 2143.46 | 1986 | 0.927 | -0.076 |
| VR | GTGCGT | 847.46  | 761  | 0.898 | -0.108 |
| VR | GTAAGG | 549.51  | 444  | 0.808 | -0.213 |
| VR | GTTCGG | 854.73  | 650  | 0.760 | -0.274 |
| VR | GTGCGA | 1173.55 | 826  | 0.704 | -0.351 |
| VR | GTTCGC | 781.50  | 545  | 0.697 | -0.360 |
| VR | GTGAGA | 2183.35 | 1511 | 0.692 | -0.368 |
| VR | GTACGG | 555.00  | 377  | 0.679 | -0.387 |
| VR | GTTAGA | 862.01  | 556  | 0.645 | -0.438 |
| VR | GTACGC | 507.46  | 286  | 0.564 | -0.573 |
| VR | GTTAGG | 846.26  | 309  | 0.365 | -1.007 |
| VS | GTTTCT | 1206.81 | 2161 | 1.791 | 0.583  |
| VS | GTCTCC | 1776.18 | 2936 | 1.653 | 0.503  |
| VS | GTCAGC | 2012.32 | 3223 | 1.602 | 0.471  |
| VS | GTTTCA | 975.63  | 1465 | 1.502 | 0.407  |
| VS | GTCAGT | 1269.59 | 1841 | 1.450 | 0.372  |
| VS | GTATCT | 783.62  | 1093 | 1.395 | 0.333  |
| VS | GTATCA | 633.51  | 806  | 1.272 | 0.241  |
| VS | GTCTCT | 1545.10 | 1847 | 1.195 | 0.178  |
| VS | GTTTCC | 1387.29 | 1604 | 1.156 | 0.145  |
| VS | GTCTCG | 469.69  | 542  | 1.154 | 0.143  |
| VS | GTCTCA | 1249.12 | 1333 | 1.067 | 0.065  |
| VS | GTGTCC | 3513.81 | 3722 | 1.059 | 0.058  |
| VS | GTGTCT | 929.19  | 860  | 0.926 | -0.077 |
| VS | GTGTCT | 3056.67 | 2784 | 0.911 | -0.093 |
| VS | GTATCC | 900.82  | 763  | 0.847 | -0.166 |
| VS | GTAAGT | 643.89  | 499  | 0.775 | -0.255 |
| VS | GTGAGC | 3980.98 | 2901 | 0.729 | -0.316 |
| VS | GTGTCA | 2471.14 | 1710 | 0.692 | -0.368 |
| VS | GTTAGT | 991.62  | 640  | 0.645 | -0.438 |
| VS | GTATCG | 238.21  | 138  | 0.579 | -0.546 |
| VS | GTTTCG | 366.85  | 202  | 0.551 | -0.597 |
| VS | GTGAGT | 2511.63 | 1371 | 0.546 | -0.605 |
| VS | GTAAGC | 1020.58 | 514  | 0.504 | -0.686 |
| VS | GTTAGC | 1571.73 | 551  | 0.351 | -1.048 |
| VT | GTCACC | 2294.69 | 4477 | 1.951 | 0.668  |
| VT | GTCACT | 1642.76 | 2452 | 1.493 | 0.401  |
| VT | GTCACG | 753.80  | 997  | 1.323 | 0.280  |

|    |         |         |      |       |               |
|----|---------|---------|------|-------|---------------|
| VT | GTA ACT | 833.15  | 1046 | 1.255 | <b>0.228</b>  |
| VT | GTCACA  | 1857.64 | 2207 | 1.188 | <b>0.172</b>  |
| VT | GTAACA  | 942.13  | 1096 | 1.163 | <b>0.151</b>  |
| VT | GTTACT  | 1283.09 | 1208 | 0.941 | <b>-0.060</b> |
| VT | GTGACC  | 4539.59 | 4223 | 0.930 | <b>-0.072</b> |
| VT | GTGACG  | 1491.24 | 1318 | 0.884 | <b>-0.123</b> |
| VT | GTGACT  | 3249.88 | 2758 | 0.849 | <b>-0.164</b> |
| VT | GTGACA  | 3674.98 | 2947 | 0.802 | <b>-0.221</b> |
| VT | GTTACA  | 1450.92 | 1111 | 0.766 | <b>-0.267</b> |
| VT | GTAACC  | 1163.79 | 758  | 0.651 | <b>-0.429</b> |
| VT | GTTACC  | 1792.28 | 969  | 0.541 | <b>-0.615</b> |
| VT | GTAACG  | 382.30  | 191  | 0.500 | <b>-0.694</b> |
| VT | GTTACG  | 588.76  | 183  | 0.311 | <b>-1.169</b> |
| VV | GTTGTA  | 655.54  | 1109 | 1.692 | <b>0.526</b>  |
| VV | GTTGTT  | 1009.55 | 1701 | 1.685 | <b>0.522</b>  |
| VV | GTAGTA  | 425.66  | 698  | 1.640 | <b>0.495</b>  |
| VV | GTGGTG  | 6476.64 | 9025 | 1.393 | <b>0.332</b>  |
| VV | GTGGTC  | 3273.84 | 4256 | 1.300 | <b>0.262</b>  |
| VV | GTAGTT  | 655.54  | 800  | 1.220 | <b>0.199</b>  |
| VV | GTTGTC  | 1292.55 | 1561 | 1.208 | <b>0.189</b>  |
| VV | GTGGTA  | 1660.38 | 1777 | 1.070 | <b>0.068</b>  |
| VV | GTGGTT  | 2557.05 | 2613 | 1.022 | <b>0.022</b>  |
| VV | GTTGTG  | 2557.05 | 2261 | 0.884 | <b>-0.123</b> |
| VV | GTAGTG  | 1660.38 | 1161 | 0.699 | <b>-0.358</b> |
| VV | GTAGTC  | 839.30  | 553  | 0.659 | <b>-0.417</b> |
| VV | GTCGTC  | 1654.87 | 858  | 0.518 | <b>-0.657</b> |
| VV | GTCGTG  | 3273.84 | 1250 | 0.382 | <b>-0.963</b> |
| VV | GTCGTA  | 839.30  | 213  | 0.254 | <b>-1.371</b> |
| VV | GTCGTT  | 1292.55 | 288  | 0.223 | <b>-1.501</b> |
| VW | GTCTGG  | 1316.29 | 1763 | 1.339 | <b>0.292</b>  |
| VW | GTGTGG  | 2604.03 | 2451 | 0.941 | <b>-0.061</b> |
| VW | GTATGG  | 667.58  | 578  | 0.866 | <b>-0.144</b> |
| VW | GTTTGG  | 1028.10 | 824  | 0.801 | <b>-0.221</b> |
| VY | GTCTAC  | 1602.79 | 2490 | 1.554 | <b>0.441</b>  |
| VY | GTTTAT  | 1017.23 | 1438 | 1.414 | <b>0.346</b>  |
| VY | GTATAT  | 660.53  | 875  | 1.325 | <b>0.281</b>  |
| VY | GTCTAT  | 1302.39 | 1544 | 1.186 | <b>0.170</b>  |
| VY | GTGTAC  | 3170.80 | 2654 | 0.837 | <b>-0.178</b> |
| VY | GTTTAC  | 1251.87 | 1008 | 0.805 | <b>-0.217</b> |
| VY | GTATAC  | 812.88  | 582  | 0.716 | <b>-0.334</b> |
| VY | GTGTAT  | 2576.51 | 1804 | 0.700 | <b>-0.356</b> |
| WA | TGGGCA  | 1469.77 | 1535 | 1.044 | <b>0.043</b>  |
| WA | TGGGCG  | 690.28  | 695  | 1.007 | <b>0.007</b>  |
| WA | TGGGCT  | 1678.97 | 1664 | 0.991 | <b>-0.009</b> |
| WA | TGGGCC  | 2552.98 | 2498 | 0.978 | <b>-0.022</b> |
| WC | TGGTGC  | 1057.38 | 1066 | 1.008 | <b>0.008</b>  |
| WC | TGGTGT  | 890.62  | 882  | 0.990 | <b>-0.010</b> |
| WD | TGGGAC  | 2699.37 | 2807 | 1.040 | <b>0.039</b>  |
| WD | TGGGAT  | 2389.63 | 2282 | 0.955 | <b>-0.046</b> |
| WE | TGGGAG  | 3580.00 | 3650 | 1.020 | <b>0.019</b>  |
| WE | TGGGAA  | 2677.00 | 2607 | 0.974 | <b>-0.026</b> |
| WF | TGGTTT  | 1639.95 | 1735 | 1.058 | <b>0.056</b>  |
| WF | TGGTTC  | 1877.05 | 1782 | 0.949 | <b>-0.052</b> |

|    |        |         |      |       |               |
|----|--------|---------|------|-------|---------------|
| WG | TGGGGT | 955.95  | 1064 | 1.113 | <b>0.107</b>  |
| WG | TGGGGC | 2002.00 | 2179 | 1.088 | <b>0.085</b>  |
| WG | TGGGGA | 1476.56 | 1454 | 0.985 | <b>-0.015</b> |
| WG | TGGGGG | 1441.49 | 1179 | 0.818 | <b>-0.201</b> |
| WH | TGGCAT | 971.42  | 1000 | 1.029 | <b>0.029</b>  |
| WH | TGGCAC | 1339.58 | 1311 | 0.979 | <b>-0.022</b> |
| WI | TGGATT | 1537.91 | 1627 | 1.058 | <b>0.056</b>  |
| WI | TGGATA | 707.30  | 714  | 1.009 | <b>0.009</b>  |
| WI | TGGATC | 1944.78 | 1849 | 0.951 | <b>-0.051</b> |
| WK | TGGAAG | 3491.83 | 3645 | 1.044 | <b>0.043</b>  |
| WK | TGGAAG | 2696.17 | 2543 | 0.943 | <b>-0.058</b> |
| WL | TGGCTA | 683.88  | 798  | 1.167 | <b>0.154</b>  |
| WL | TGGCTG | 3821.78 | 4228 | 1.106 | <b>0.101</b>  |
| WL | TGGCTT | 1268.11 | 1334 | 1.052 | <b>0.051</b>  |
| WL | TGGCTC | 1839.05 | 1879 | 1.022 | <b>0.021</b>  |
| WL | TGGTTG | 1242.54 | 855  | 0.688 | <b>-0.374</b> |
| WL | TGGTTA | 739.64  | 501  | 0.677 | <b>-0.390</b> |
| WM | TGGATG | 2335.00 | 2335 | 1.000 | <b>0.000</b>  |
| WN | TGGAAT | 1978.70 | 2005 | 1.013 | <b>0.013</b>  |
| WN | TGGAAC | 2179.30 | 2153 | 0.988 | <b>-0.012</b> |
| WP | TGGCCC | 1302.21 | 1381 | 1.061 | <b>0.059</b>  |
| WP | TGGCCG | 471.84  | 486  | 1.030 | <b>0.030</b>  |
| WP | TGGCCA | 1125.64 | 1123 | 0.998 | <b>-0.002</b> |
| WP | TGGCCT | 1166.31 | 1076 | 0.923 | <b>-0.081</b> |
| WQ | TGGCAG | 2983.56 | 2997 | 1.005 | <b>0.004</b>  |
| WQ | TGGCAA | 1068.44 | 1055 | 0.987 | <b>-0.013</b> |
| WR | TGGAGG | 1198.99 | 1665 | 1.389 | <b>0.328</b>  |
| WR | TGGAGA | 1221.30 | 1472 | 1.205 | <b>0.187</b>  |
| WR | TGGCGG | 1210.98 | 979  | 0.808 | <b>-0.213</b> |
| WR | TGGCGC | 1107.23 | 895  | 0.808 | <b>-0.213</b> |
| WR | TGGCGT | 474.05  | 377  | 0.795 | <b>-0.229</b> |
| WR | TGGCGA | 656.45  | 481  | 0.733 | <b>-0.311</b> |
| WS | TGGAGT | 1031.75 | 1239 | 1.201 | <b>0.183</b>  |
| WS | TGGAGC | 1635.35 | 1956 | 1.196 | <b>0.179</b>  |
| WS | TGGTCA | 1015.12 | 898  | 0.885 | <b>-0.123</b> |
| WS | TGGTCC | 1443.44 | 1271 | 0.881 | <b>-0.127</b> |
| WS | TGGTCT | 1255.65 | 1076 | 0.857 | <b>-0.154</b> |
| WS | TGGTCG | 381.70  | 323  | 0.846 | <b>-0.167</b> |
| WT | TGGACG | 598.07  | 674  | 1.127 | <b>0.120</b>  |
| WT | TGGACA | 1473.88 | 1559 | 1.058 | <b>0.056</b>  |
| WT | TGGACT | 1303.39 | 1240 | 0.951 | <b>-0.050</b> |
| WT | TGGACC | 1820.65 | 1723 | 0.946 | <b>-0.055</b> |
| WV | TGGGTC | 1318.64 | 1378 | 1.045 | <b>0.044</b>  |
| WV | TGGGTG | 2608.66 | 2633 | 1.009 | <b>0.009</b>  |
| WV | TGGGTA | 668.77  | 665  | 0.994 | <b>-0.006</b> |
| WV | TGGGTT | 1029.93 | 950  | 0.922 | <b>-0.081</b> |
| WW | TGGTGG | 1559.00 | 1559 | 1.000 | <b>0.000</b>  |
| WY | TGGTAC | 1444.91 | 1520 | 1.052 | <b>0.051</b>  |
| WY | TGGTAT | 1174.09 | 1099 | 0.936 | <b>-0.066</b> |
| YA | TATGCA | 1120.39 | 2249 | 2.007 | <b>0.697</b>  |
| YA | TATGCT | 1279.86 | 2296 | 1.794 | <b>0.584</b>  |
| YA | TATGCC | 1946.11 | 2862 | 1.471 | <b>0.386</b>  |
| YA | TACGCG | 647.56  | 622  | 0.961 | <b>-0.040</b> |

|    |        |         |      |       |               |
|----|--------|---------|------|-------|---------------|
| YA | TATGCG | 526.19  | 482  | 0.916 | <b>-0.088</b> |
| YA | TACGCC | 2395.00 | 1402 | 0.585 | <b>-0.535</b> |
| YA | TACGCA | 1378.81 | 512  | 0.371 | <b>-0.991</b> |
| YA | TACGCT | 1575.07 | 444  | 0.282 | <b>-1.266</b> |
| YC | TACTGC | 1588.07 | 2411 | 1.518 | <b>0.418</b>  |
| YC | TACTGT | 1337.61 | 1587 | 1.186 | <b>0.171</b>  |
| YC | TATTGT | 1086.90 | 659  | 0.606 | <b>-0.500</b> |
| YC | TATTGC | 1290.42 | 646  | 0.501 | <b>-0.692</b> |
| YD | TATGAT | 2091.17 | 3707 | 1.773 | <b>0.572</b>  |
| YD | TATGAC | 2362.22 | 3731 | 1.579 | <b>0.457</b>  |
| YD | TACGAC | 2907.08 | 1653 | 0.569 | <b>-0.565</b> |
| YD | TACGAT | 2573.52 | 843  | 0.328 | <b>-1.116</b> |
| YE | TATGAA | 2515.85 | 5225 | 2.077 | <b>0.731</b>  |
| YE | TATGAG | 3364.48 | 4722 | 1.403 | <b>0.339</b>  |
| YE | TACGAG | 4140.53 | 2309 | 0.558 | <b>-0.584</b> |
| YE | TACGAA | 3096.14 | 861  | 0.278 | <b>-1.280</b> |
| YF | TACTTC | 2766.63 | 3380 | 1.222 | <b>0.200</b>  |
| YF | TATTTT | 1964.12 | 2124 | 1.081 | <b>0.078</b>  |
| YF | TACTTT | 2417.16 | 2201 | 0.911 | <b>-0.094</b> |
| YF | TATTTT | 2248.09 | 1691 | 0.752 | <b>-0.285</b> |
| YG | TATGGA | 1472.35 | 2874 | 1.952 | <b>0.669</b>  |
| YG | TATGGT | 953.23  | 1665 | 1.747 | <b>0.558</b>  |
| YG | TATGGG | 1437.38 | 2129 | 1.481 | <b>0.393</b>  |
| YG | TATGGC | 1996.30 | 2749 | 1.377 | <b>0.320</b>  |
| YG | TACGGG | 1768.93 | 1088 | 0.615 | <b>-0.486</b> |
| YG | TACGGC | 2456.76 | 1484 | 0.604 | <b>-0.504</b> |
| YG | TACGGT | 1173.10 | 448  | 0.382 | <b>-0.963</b> |
| YG | TACGGA | 1811.96 | 633  | 0.349 | <b>-1.052</b> |
| YH | TACCAC | 1862.81 | 2378 | 1.277 | <b>0.244</b>  |
| YH | TACCAT | 1350.85 | 1420 | 1.051 | <b>0.050</b>  |
| YH | TATCAT | 1097.67 | 1021 | 0.930 | <b>-0.072</b> |
| YH | TATCAC | 1513.67 | 1006 | 0.665 | <b>-0.409</b> |
| YI | TACATC | 2684.66 | 3935 | 1.466 | <b>0.382</b>  |
| YI | TACATT | 2122.99 | 2162 | 1.018 | <b>0.018</b>  |
| YI | TATATT | 1725.09 | 1554 | 0.901 | <b>-0.104</b> |
| YI | TACATA | 976.39  | 846  | 0.866 | <b>-0.143</b> |
| YI | TATATA | 793.39  | 648  | 0.817 | <b>-0.202</b> |
| YI | TATATC | 2181.48 | 1339 | 0.614 | <b>-0.488</b> |
| YK | TACAAG | 3508.58 | 4372 | 1.246 | <b>0.220</b>  |
| YK | TACAAA | 2709.10 | 2847 | 1.051 | <b>0.050</b>  |
| YK | TATAAA | 2201.34 | 2262 | 1.028 | <b>0.027</b>  |
| YK | TATAAG | 2850.98 | 1789 | 0.628 | <b>-0.466</b> |
| YL | TACCTG | 4522.42 | 6324 | 1.398 | <b>0.335</b>  |
| YL | TATTTA | 711.20  | 966  | 1.358 | <b>0.306</b>  |
| YL | TACCTC | 2176.20 | 2598 | 1.194 | <b>0.177</b>  |
| YL | TACTTG | 1470.33 | 1701 | 1.157 | <b>0.146</b>  |
| YL | TATTTG | 1194.75 | 1358 | 1.137 | <b>0.128</b>  |
| YL | TACCTA | 809.25  | 876  | 1.082 | <b>0.079</b>  |
| YL | TACCTT | 1500.58 | 1449 | 0.966 | <b>-0.035</b> |
| YL | TATCTT | 1219.33 | 1166 | 0.956 | <b>-0.045</b> |
| YL | TACTTA | 875.24  | 763  | 0.872 | <b>-0.137</b> |
| YL | TATCTA | 657.58  | 541  | 0.823 | <b>-0.195</b> |
| YL | TATCTC | 1768.32 | 1087 | 0.615 | <b>-0.487</b> |

|    |        |         |      |       |        |
|----|--------|---------|------|-------|--------|
| YL | TATCTG | 3674.80 | 1751 | 0.476 | -0.741 |
| YM | TACATG | 2325.97 | 3055 | 1.313 | 0.273  |
| YM | TATATG | 1890.03 | 1161 | 0.614 | -0.487 |
| YN | TACAAC | 2442.24 | 3341 | 1.368 | 0.313  |
| YN | TACAAT | 2217.44 | 2200 | 0.992 | -0.008 |
| YN | TATAAT | 1801.83 | 1629 | 0.904 | -0.101 |
| YN | TATAAC | 1984.50 | 1276 | 0.643 | -0.442 |
| YP | TACCCG | 668.65  | 1004 | 1.502 | 0.406  |
| YP | TACCCA | 1595.15 | 1925 | 1.207 | 0.188  |
| YP | TATCCA | 1296.18 | 1438 | 1.109 | 0.104  |
| YP | TACCCC | 1845.38 | 1961 | 1.063 | 0.061  |
| YP | TATCCT | 1343.02 | 1379 | 1.027 | 0.026  |
| YP | TACCCT | 1652.79 | 1558 | 0.943 | -0.059 |
| YP | TATCCC | 1499.51 | 937  | 0.625 | -0.470 |
| YP | TATCCG | 543.32  | 242  | 0.445 | -0.809 |
| YQ | TACCAG | 3987.12 | 5013 | 1.257 | 0.229  |
| YQ | TATCAA | 1160.22 | 1179 | 1.016 | 0.016  |
| YQ | TACCAA | 1427.83 | 1397 | 0.978 | -0.022 |
| YQ | TATCAG | 3239.83 | 2226 | 0.687 | -0.375 |
| YR | TACCGC | 1307.70 | 2153 | 1.646 | 0.499  |
| YR | TACCGA | 775.30  | 990  | 1.277 | 0.244  |
| YR | TACAGA | 1442.41 | 1834 | 1.271 | 0.240  |
| YR | TACCGG | 1430.23 | 1796 | 1.256 | 0.228  |
| YR | TACAGG | 1416.06 | 1671 | 1.180 | 0.166  |
| YR | TACCGT | 559.87  | 642  | 1.147 | 0.137  |
| YR | TATCGA | 629.99  | 570  | 0.905 | -0.100 |
| YR | TATCGT | 454.94  | 383  | 0.842 | -0.172 |
| YR | TATAGA | 1172.07 | 827  | 0.706 | -0.349 |
| YR | TATCGG | 1162.17 | 629  | 0.541 | -0.614 |
| YR | TATAGG | 1150.66 | 560  | 0.487 | -0.720 |
| YR | TATCGC | 1062.60 | 509  | 0.479 | -0.736 |
| YS | TACAGC | 2204.13 | 3590 | 1.629 | 0.488  |
| YS | TACTCG | 514.46  | 783  | 1.522 | 0.420  |
| YS | TACAGT | 1390.60 | 1887 | 1.357 | 0.305  |
| YS | TATTCA | 1111.75 | 1210 | 1.088 | 0.085  |
| YS | TACTCC | 1945.47 | 2088 | 1.073 | 0.071  |
| YS | TATTCT | 1375.18 | 1466 | 1.066 | 0.064  |
| YS | TACTCA | 1368.18 | 1188 | 0.868 | -0.141 |
| YS | TATTCC | 1580.84 | 1306 | 0.826 | -0.191 |
| YS | TACTCT | 1692.37 | 1173 | 0.693 | -0.367 |
| YS | TATAGT | 1129.96 | 728  | 0.644 | -0.440 |
| YS | TATTCG | 418.04  | 229  | 0.548 | -0.602 |
| YS | TATAGC | 1791.02 | 874  | 0.488 | -0.717 |
| YT | TACACG | 697.26  | 1311 | 1.880 | 0.631  |
| YT | TACACC | 2122.58 | 2696 | 1.270 | 0.239  |
| YT | TACACA | 1718.31 | 2158 | 1.256 | 0.228  |
| YT | TACACT | 1519.54 | 1409 | 0.927 | -0.076 |
| YT | TATACT | 1234.74 | 1049 | 0.850 | -0.163 |
| YT | TATACA | 1396.25 | 1049 | 0.751 | -0.286 |
| YT | TATACC | 1724.75 | 1063 | 0.616 | -0.484 |
| YT | TATACG | 566.57  | 245  | 0.432 | -0.838 |
| YV | TATGTT | 986.79  | 1723 | 1.746 | 0.557  |
| YV | TATGTA | 640.76  | 1113 | 1.737 | 0.552  |

|    |        |         |      |       |               |
|----|--------|---------|------|-------|---------------|
| YV | TATGTC | 1263.40 | 1862 | 1.474 | <b>0.388</b>  |
| YV | TATGTG | 2499.39 | 3382 | 1.353 | <b>0.302</b>  |
| YV | TACGTG | 3075.90 | 2279 | 0.741 | <b>-0.300</b> |
| YV | TACGTC | 1554.82 | 991  | 0.637 | <b>-0.450</b> |
| YV | TACGTA | 788.55  | 284  | 0.360 | <b>-1.021</b> |
| YV | TACGTT | 1214.40 | 390  | 0.321 | <b>-1.136</b> |
| YW | TACTGG | 1609.87 | 2212 | 1.374 | <b>0.318</b>  |
| YW | TATTGG | 1308.13 | 706  | 0.540 | <b>-0.617</b> |
| YY | TACTAC | 2256.03 | 2854 | 1.265 | <b>0.235</b>  |
| YY | TATTAT | 1489.60 | 1459 | 0.979 | <b>-0.021</b> |
| YY | TACTAT | 1833.19 | 1760 | 0.960 | <b>-0.041</b> |
| YY | TATTAC | 1833.19 | 1339 | 0.730 | <b>-0.314</b> |

Table S2

| <u>P1-Region</u> | <u>Codon Pair Bias</u> |
|------------------|------------------------|
| PV-Max           | +0.246                 |
| PV(M)-wt         | -0.034                 |
| PV-SD            | -0.095                 |
| PV-AB            | -0.096                 |
| PV-MinZ          | -0.205                 |
| PV-MinXY         | -0.391                 |
| PV-Min           | -0.474                 |

**Table S2.** Includes the Codon-pair Bias of various designed as well as the natural nucleotide encodings of the poliovirus P1 protein. The table includes two viruses previously constructed PV-AB and PV-SD (S4). The virus PV-SD, had 937 mutations in synonymous codons in the P1 region and was constructed by randomly shuffling the existing codons (S4). In PV-SD neither codon bias nor codon pair bias was significantly altered and PV-SD grew with a wt phenotype (S4). The second virus PV-AB used only rare codons (S4), yet its CPB was not altered drastically either, thus despite derivatives of PV-AB having an attenuated phenotype the attenuation was not due to codon pairing. These two viruses indicate that the attenuation observed in PV-Min derivative viruses was not a result of random changes in synonymous codons.



## References and Notes

- S1. G. A. Gutman, G. W. Hatfield, *Proc Natl Acad Sci U S A* **86**, 3699 (May, 1989).
  - S2. S. Park, X. Yang, J. G. Saven, *Curr Opin Struct Biol* **14**, 487 (Aug, 2004).
  - S3. S. van der Werf, J. Bradley, E. Wimmer, F. W. Studier, J. J. Dunn, *Proc. Natl. Acad. Sci. U.S.A.* **78**, 2330 (1986).
  - S4. S. Mueller, D. Papamichail, J. R. Coleman, S. Skiena, E. Wimmer, *J Virol* **80**, 9687 (Oct, 2006).
  - S5. S. Mueller, E. Wimmer, J. Cello, *Virus Res* **111**, 175 (Aug, 2005).
  - S6. R. R. Rueckert, *Picornaviridae and their replication*. B. N. Fields *et al.*, Eds., Virology (Raven Press, New York, ed. 2nd ed., 1990), pp. 507-548.
  - S7. S. Koike *et al.*, *Proc. Natl. Acad. Sci. U. S. A.* **88**, 951 (1991).
  - S8. L. J. Reed, M. Muench, *Am. J. Hyg.* **27**, 493 (1938).
  - S9. H. Toyoda, J. Yin, S. Mueller, E. Wimmer, J. Cello, *Cancer Res* **67**, 2857 (Mar 15, 2007).
  - S10. A. F. Wahby, *Clin Diagn Lab Immunol* **7**, 915 (Nov, 2000).
  - S11. M. Zucker. *Nucleic Acids Res.* **31 (13)**, 3406-15, (2003)
  - S12. O. M. Kew, R. W. Sutter, E. M. de Gourville, W. R. Dowdle, M. A. Pallansch, *Annu Rev Microbiol* **59**, 587 (2005).
-
